# Supplementary material for: Identifying Quantitative Trait Loci for Thousand Grain Weight in Eggplant by Genome Re-Sequencing Analysis
Source: Front Genet. 2022 May 18;13:841198. doi: 10.3389/fgene.2022.841198 (PMC9157640; doi:10.3389/fgene.2022.841198)
Supplement: Supplementary file 1 [file Table1.XLS]

## Sheet: Primers
Table S1. The primers used in this study
Primer name	Sequence
EF1α-F	CCACACTTCTCATATTGCTGTCA
EF1α-R	ACCAGCATCACCATTCTTCAAAA
SMEL_009g329850-F	AAGCAGTGTTGTGTGGTGGA
SMEL_009g329850-R	AGCAAAGGCGTCCATCTTCA

## Sheet: phenotype
Table S1. The thousand grain weight (TGW) in six generations
ID	TGW (g)
P1	3
P2	3.97
F1	3.77
BC1P1-1	3.05
BC1P1-2	3.63667
BC1P1-3	4.03333
BC1P1-4	3.44333
BC1P1-5	3.70333
BC1P1-6	2.42667
BC1P1-7	2.7
BC1P1-8	3.51333
BC1P1-9	3.37333
BC1P1-10	3.36
BC1P1-11	3.21333
BC1P1-12	3.22667
BC1P1-13	2.84
BC1P1-14	3.44333
BC1P1-15	3.12
BC1P1-16	3.5
BC1P1-17	3.13667
BC1P1-18	3.76667
BC1P1-19	4.62
BC1P1-20	3.51
BC1P1-21	3.45333
BC1P1-22	2.79333
BC1P1-23	N/A
BC1P1-24	3.15667
BC1P1-25	N/A
BC1P1-26	3.03333
BC1P1-27	3.18
BC1P1-28	3.275
BC1P1-29	3.35333
BC1P1-30	5.07
BC1P1-31	3.47333
BC1P1-32	2.93
BC1P1-33	3.59
BC1P1-34	3.49333
BC1P1-35	4.06
BC1P1-36	3.58667
BC1P1-37	3.50333
BC1P1-38	3.50333
BC1P1-39	3.55
BC1P1-40	N/A
BC1P1-41	3.71
BC1P1-42	2.05333
BC1P1-43	2.93
BC1P1-44	2.57667
BC1P2-1	4.16333
BC1P2-2	3.58333
BC1P2-3	4.42667
BC1P2-4	4.65333
BC1P2-5	4.37333
BC1P2-6	4.28
BC1P2-7	3.77667
BC1P2-8	4.57333
BC1P2-9	4.21
BC1P2-10	4.05333
BC1P2-11	4.21333
BC1P2-12	4.37667
BC1P2-13	3.87333
BC1P2-14	4.04667
BC1P2-15	3.64
BC1P2-16	4.33667
BC1P2-17	4.45
BC1P2-18	3.64
BC1P2-19	4.04
BC1P2-20	4.56
BC1P2-21	3.86333
BC1P2-22	4.28
BC1P2-23	N/A
BC1P2-24	4.08667
BC1P2-25	4.41333
BC1P2-26	4.65667
BC1P2-27	N/A
BC1P2-28	3.65333
BC1P2-29	3.92
BC1P2-30	3.95
BC1P2-31	4.29
BC1P2-32	3.50333
BC1P2-33	4.39667
BC1P2-34	4.88333
BC1P2-35	3.27333
BC1P2-36	4.32333
BC1P2-37	2.93333
BC1P2-38	4.2
BC1P2-39	3.88
BC1P2-40	4.05333
BC1P2-41	4.14333
BC1P2-42	3.7
BC1P2-43	3.90667
BC1P2-44	4.06
F2-1	3.34333
F2-2	3.82
F2-3	2.96667
F2-4	3.05
F2-5	3.39333
F2-6	3.45667
F2-7	4.25
F2-8	4.14
F2-9	4.12667
F2-10	3.8
F2-11	4.08667
F2-12	3.61333
F2-13	4.16333
F2-14	3.22
F2-15	N/A
F2-16	3.59333
F2-17	4.04667
F2-18	4.79667
F2-19	3.38667
F2-20	3.46333
F2-21	3.38667
F2-22	4.04
F2-23	2.86333
F2-24	4.16
F2-25	3.76667
F2-26	4.12
F2-27	4.17667
F2-28	3.96
F2-29	3.61
F2-30	3.73667
F2-31	4.19667
F2-32	4.87
F2-33	4.35
F2-34	4.54667
F2-35	3.74
F2-36	3.52667
F2-37	3.83667
F2-38	4.26
F2-39	4.02333
F2-40	4.26
F2-41	4.07
F2-42	4.3
F2-43	3.6
F2-44	3.7
F2-45	3.09667
F2-46	3.15333
F2-47	3.43333
F2-48	3.53
F2-49	4.16
F2-50	3.22667
F2-51	4.13333
F2-52	3.65667
F2-53	3.37
F2-54	3.17333
F2-55	4.81
F2-56	3.91333
F2-57	4.39333
F2-58	3.02333
F2-59	3.82667
F2-60	3.65333
F2-61	3.68333
F2-62	3.59
F2-63	N/A
F2-64	4.28667
F2-65	4.01667
F2-66	4.39333
F2-67	3.57667
F2-68	3.72
F2-69	3.62667
F2-70	3.71667
F2-71	3.39
F2-72	4.19333
F2-73	N/A
F2-74	3.17667
F2-75	3.975
F2-76	4.33333
F2-77	4.25667
F2-78	5.28667
F2-79	3.85667
F2-80	3.11333
F2-81	4.14
F2-82	3.605
F2-83	3.22333
F2-84	3.54333
F2-85	4.29333
F2-86	4.01
F2-87	3.63
F2-88	3.02
F2-89	4.46333
F2-90	3.71
F2-91	3.13
F2-92	4.15
F2-93	4.48
F2-94	3.55333
F2-95	3.9
F2-96	3.96667
F2-97	2.62333
F2-98	4.31
F2-99	4.27667
F2-100	3.39
F2-101	3.46667
F2-102	3.00333
F2-103	3.95667
F2-104	3.50333
F2-105	4.04
F2-106	4.12333
F2-107	3.63667
F2-108	N/A
F2-109	N/A
F2-110	3.37
F2-111	3.85333
F2-112	4.55667
F2-113	2.97
F2-114	4.13333
F2-115	3.99333
F2-116	4.34667
F2-117	3.95
F2-118	3.76333
F2-119	4.33
F2-120	3.65333
F2-121	3.58
F2-122	4.00667
F2-123	3.30667
F2-124	3.78333
F2-125	3.78
F2-126	4.97667
F2-127	3.57333
F2-128	3.94
F2-129	3.14333
F2-130	N/A
F2-131	3.74333
F2-132	4.54
F2-133	3.9
F2-134	3.94667
F2-135	3.68333
F2-136	3.27
F2-137	3.24
F2-138	3.84
F2-139	4.16667
F2-140	N/A
F2-141	3.90333
F2-142	3.71667
F2-143	3.73
F2-144	5.27667
F2-145	3.73333
F2-146	3.94667
F2-147	4.68
F2-148	3.66333
F2-149	4.03667
F2-150	3.75333
F2-151	4.25667
F2-152	4.00333
F2-153	N/A
F2-154	N/A
F2-155	3.79
F2-156	N/A
F2-157	4.22667
F2-158	N/A
F2-159	3.89333
F2-160	3.81333
F2-161	3.31333
F2-162	4.10667
F2-163	4.22333
F2-164	3.87667
F2-165	4.49
F2-166	4.45667
F2-167	4.43667
F2-168	4.19
F2-169	3.92
F2-170	4.21333
F2-171	4.58333
F2-172	4.35
F2-173	3.68
F2-174	4.64333
F2-175	3.20667
F2-176	2.92
F2-177	3.82
F2-178	N/A
F2-179	3.76333
F2-180	4.25667
F2-181	3.79
F2-182	3.96
F2-183	3.51
F2-184	4.72667
F2-185	3.72667
F2-186	3.69
F2-187	3.85333
F2-188	3.07
F2-189	3.14667
F2-190	N/A
F2-191	3.12667
F2-192	3.43667
F2-193	4.20333
F2-194	3.46667
F2-195	3.60333
F2-196	3.48667
F2-197	4.67667
F2-198	3.44333
F2-199	3.59333
F2-200	3.68667
F2-201	4.12333
F2-202	3.44667
F2-203	4.24333
F2-204	3.70333
F2-205	3.35667
F2-206	4.78333
F2-207	3.53333
F2-208	3.86333
F2-209	3.97
F2-210	3.39667
F2-211	4.24667
F2-212	4.17
F2-213	3.73667
F2-214	3.10667
F2-215	4.51
F2-216	3.31667
F2-217	3.13333
F2-218	3.66333
F2-219	3.64667
F2-220	3.67667
F2-221	4.49333
F2-222	4
F2-223	3.10667
F2-224	3.58
F2-225	4.33333
F2-226	3.75
F2-227	4.52333
F2-228	3.94
F2-229	4.77667
F2-230	4.22
F2-231	3.95
F2-232	3.52667
F2-233	3.47667
F2-234	4.32667
F2-235	4.34667
F2-236	4.09333
F2-237	N/A
F2-238	4.21667
F2-239	3.43667
F2-240	3.59667
F2-241	N/A
F2-242	3.37
F2-243	4.12667
F2-244	3.23667
F2-245	3.46333
F2-246	3.10667
F2-247	4.07333
F2-248	4.17667
F2-249	3.81667
F2-250	3.52333
F2-251	3.46
F2-252	4.68667
F2-253	N/A
F2-254	4.22667
F2-255	4.38
F2-256	3.85333
F2-257	3.88667
F2-258	3.58667
F2-259	3.60667
F2-260	3.77667
F2-261	3.55
F2-262	3.55333
F2-263	N/A
F2-264	3.10667
F2-265	3.5
F2-266	3.31
F2-267	3.89
F2-268	3.5
F2-269	3.56667
F2-270	4.82333
F2-271	3.50333
F2-272	3.25
F2-273	4.16333
F2-274	3.44333
F2-275	4.65667
F2-276	4.41333
F2-277	3.23333
F2-278	3.9
F2-279	4.29
F2-280	2.97
F2-281	N/A
F2-282	3.61667
F2-283	3.86667
F2-284	3.01333
F2-285	4.61667
F2-286	4.10333
F2-287	4.03333
F2-288	4.73667
F2-289	4.85
F2-290	3.66
F2-291	4.97
F2-292	3.795
F2-293	3.39
F2-294	5.12
F2-295	3.84667
F2-296	4.62333
F2-297	4.24
F2-298	4.21
F2-299	4.31667
F2-300	3.37333
F2-301	4.33333
F2-302	4.56333
F2-303	4.44
F2-304	4.41333
F2-305	4.37667
F2-306	4.37333
F2-307	3.61333
F2-308	3.81

## Sheet: genetic analysis-1
Table S3. The estimation of long-max-likelihood-value（MLV）and Akaike’s information criterion（AIC）value of each genetic model of TGW
Model	TGW
	MLV	AIC
1MG-AD	-268.876	545.753
1MG-A	-269.674	545.347
1MG-EAD	-289.002	584.005
1MG-NCD	-270.148	546.295
2MG-ADI	-258.201	536.402
2MG-AD	-261.214	534.427
2MG-A	-320.675	649.351
2MG-EA	-268.998	543.995
2MG-CD	-287.038	582.077
2MG-EAD	-287.038	580.075
PG-ADI	-248.157	516.314
PG-AD	-260.737	535.474
MX1-AD-ADI	-247.135	518.271
MX1-AD-AD	-252.621	523.242
MX1-A-AD	-259.992	535.983
MX1-EAD-AD	-258.343	532.686
MX1-NCD-AD	-260.601	537.203
MX2-ADI-ADI	-245.579	527.158
MX2-ADI-AD	-245.57	521.14
MX2-AD-AD	-260.585	543.17
MX2-A-AD	-245.324	508.648
MX2-EA-AD	-259.536	535.072
MX2-CD-AD	-321.949	661.897
MX2-EAD-AD	-257.849	531.699

## Sheet: genetic analysis-2
Table S4. Tests for goodness of fit of genetic models of TGW
Model	Population	U12	U22	U32	nW2	Dn
PG-ADI	P1	0.0564(0.8122)	0.0315(0.8592)	0.0444(0.8331)	0.0429(0.9175)	0.1538(0.9227)
	P2	0.0941(0.7591)	0.0935(0.7597)	0.0013(0.9716)	0.1382(0.4304)	0.2305(0.5293)
	F1	0.1048(0.7462)	0.1024(0.7489)	0.0007(0.9787)	0.1144(0.5261)	0.2320(0.5210)
	B1	0.0292(0.8642)	0.3271(0.5674)	2.6416(0.1041)	0.1573(0.3692)	0.1389(0.3730)
	B2	0.0967(0.7558)	0.0460(0.8302)	0.1200(0.7290)	0.0469(0.8947)	0.0963(0.7957)
	F2	0.1102(0.7399)	0.0342(0.8533)	0.2983(0.5849)	0.0797(0.7044)	0.0393(0.7461)
MX1-AD-ADI	P1	0.0564(0.8122)	0.0315(0.8592)	0.0444(0.8331)	0.0429(0.9175)	0.1538(0.9227)
	P2	0.0940(0.7592)	0.0935(0.7598)	0.0013(0.9717)	0.1382(0.4304)	0.2305(0.5293)
	F1	0.1046(0.7464)	0.1023(0.7491)	0.0007(0.9789)	0.1143(0.5263)	0.2320(0.5212)
	B1	0.0296(0.8634)	0.3115(0.5768)	2.4533(0.1173)	0.1517(0.3860)	0.1373(0.3871)
	B2	0.0615(0.8041)	0.0014(0.9703)	0.6591(0.4169)	0.0533(0.8565)	0.0971(0.7876)
	F2	0.0201(0.8872)	0.0000(0.9959)	0.3249(0.5687)	0.0494(0.8801)	0.0376(0.7915)
MX2-A-AD	P1	0.0470(0.8284)	0.0242(0.8764)	0.0473(0.8278)	0.0417(0.9242)	0.1514(0.9308)
	P2	1.6799(0.1949)	1.1015(0.2939)	0.6752(0.4113)	0.3250(0.1211)	0.3541(0.0972)
	F1	4.2098(0.0402)*	2.5581(0.1097)	2.3989(0.1214)	0.5505(0.0300)*	0.4299(0.0231)*
	B1	0.4226(0.5156)	0.8265(0.3633)	1.2516(0.2632)	0.1482(0.3968)	0.1446(0.3262)
	B2	0.1614(0.6879)	0.0928(0.7607)	0.1139(0.7357)	0.0555(0.8434)	0.1024(0.7317)
	F2	0.0951(0.7578)	0.0609(0.8051)	0.0431(0.8355)	0.0417(0.9243)	0.0386(0.7650)
Note：U12,U22,U32are the statistic of Uniformity test；nW2 is the statistic of Smirnov test；Dn is the statistic of Kolmogorov test. * indicates the different significance at P < 0.05 level.

## Sheet: LOD
Table S5. The LOD values and phenotypic contribution rate of bin markers
TGW
Nr	Group	Position	Locus	LOD	Additive	Dominance	expl%
1	1	0	Block339	0.462066	-0.0142	0.00382449	0.0540114
2	1	0	Block340	0.462066	-0.0142	0.00382449	0.0540114
3	1	0	Block179	0.462066	-0.0142	0.00382449	0.0540114
4	1	0	Block194	0.462066	-0.0142	0.00382449	0.0540114
5	1	0	Block188	0.462066	-0.0142	0.00382449	0.0540114
6	1	1	Block198	0.473807	-0.0189072	-0.00472163	0.0943792
7	1	1.5	Block101	0.637934	-0.0238545	-0.0134007	0.167529
8	1	1.5	Block16	0.637934	-0.0238545	-0.0134007	0.167529
9	1	1.5	Block85	0.637934	-0.0238545	-0.0134007	0.167529
10	1	1.5	Block17	0.637934	-0.0238545	-0.0134007	0.167529
11	1	1.5	Block185	0.637934	-0.0238545	-0.0134007	0.167529
12	1	2	Block289	0.633381	-0.0217333	-0.0100967	0.133343
13	1	2	Block125	0.633381	-0.0217333	-0.0100967	0.133343
14	1	2	Block277	0.633381	-0.0217333	-0.0100967	0.133343
15	1	2	Block270	0.633381	-0.0217333	-0.0100967	0.133343
16	1	2.5	Block268	0.51345	-0.0225	-0.00884615	0.139184
17	1	2.5	Block299	0.51345	-0.0225	-0.00884615	0.139184
18	1	2.5	Block168	0.51345	-0.0225	-0.00884615	0.139184
19	1	2.5	Block313	0.51345	-0.0225	-0.00884615	0.139184
20	1	2.5	Block300	0.51345	-0.0225	-0.00884615	0.139184
21	1	2.5	Block64	0.51345	-0.0225	-0.00884615	0.139184
22	1	3	Block232	0.419822	-0.0126389	0.00968137	0.0535423
23	1	3	Block319	0.419822	-0.0126389	0.00968137	0.0535423
24	1	4	Block490	0.324819	-0.0286696	0.0164029	0.247815
25	1	4.5	Block486	0.214341	-0.0365121	0.0300147	0.462178
26	1	4.5	Block445	0.214341	-0.0365121	0.0300147	0.462178
27	1	4.5	Block379	0.214341	-0.0365121	0.0300147	0.462178
28	1	4.5	Block438	0.214341	-0.0365121	0.0300147	0.462178
29	1	4.5	Block382	0.214341	-0.0365121	0.0300147	0.462178
30	1	4.5	Block441	0.214341	-0.0365121	0.0300147	0.462178
31	1	4.5	Block492	0.214341	-0.0365121	0.0300147	0.462178
32	1	4.5	Block487	0.214341	-0.0365121	0.0300147	0.462178
33	1	4.5	Block459	0.214341	-0.0365121	0.0300147	0.462178
34	1	4.5	Block448	0.214341	-0.0365121	0.0300147	0.462178
35	1	4.5	Block433	0.214341	-0.0365121	0.0300147	0.462178
36	1	4.5	Block431	0.214341	-0.0365121	0.0300147	0.462178
37	1	4.5	Block384	0.214341	-0.0365121	0.0300147	0.462178
38	1	4.5	Block485	0.214341	-0.0365121	0.0300147	0.462178
39	1	4.5	Block435	0.214341	-0.0365121	0.0300147	0.462178
40	1	4.5	Block456	0.214341	-0.0365121	0.0300147	0.462178
41	1	4.5	Block566	0.214341	-0.0365121	0.0300147	0.462178
42	1	4.5	Block429	0.214341	-0.0365121	0.0300147	0.462178
43	1	5	Block385	0.323887	-0.0426958	0.0174295	0.511185
44	1	6.001	Block376	0.361191	-0.0216095	0.00204726	0.120936
45	1	6.501	Block569	0.36523	-0.0257967	-0.0067033	0.17609
46	1	7.501	Block565	0.104629	-0.0408278	0.0229201	0.49992
47	1	7.501	Block591	0.104629	-0.0408278	0.0229201	0.49992
48	1	8.001	Block594	0.144152	-0.0449072	0.0151922	0.551533
49	1	8.001	Block579	0.144152	-0.0449072	0.0151922	0.551533
50	1	8.501	Block602	0.0991473	-0.0500818	0.0235895	0.72159
51	1	8.501	Block592	0.0991473	-0.0500818	0.0235895	0.72159
52	1	8.501	Block596	0.0991473	-0.0500818	0.0235895	0.72159
53	1	9.001	Block607	0.129086	-0.0437651	0.010877	0.510256
54	1	9.501	Block660	0.114294	-0.0317485	-0.0102566	0.271088
55	1	9.501	Block616	0.114294	-0.0317485	-0.0102566	0.271088
56	1	11.001	Block668	0.059716	-0.0417623	0.0273283	0.548743
57	1	11.001	Block659	0.059716	-0.0417623	0.0273283	0.548743
58	1	11.501	Block666	0.0491968	-0.0325364	0.00896713	0.284051
59	1	11.501	Block667	0.0491968	-0.0325364	0.00896713	0.284051
60	1	11.501	Block677	0.0491968	-0.0325364	0.00896713	0.284051
61	1	12.001	Block669	0.0279127	-0.0234441	0.0268679	0.235636
62	1	12.001	Block670	0.0279127	-0.0234441	0.0268679	0.235636
63	1	12.001	Block689	0.0279127	-0.0234441	0.0268679	0.235636
64	1	12.501	Block688	0.0262782	-0.013895	0.00863858	0.0596993
65	1	12.501	Block690	0.0262782	-0.013895	0.00863858	0.0596993
66	1	12.501	Block673	0.0262782	-0.013895	0.00863858	0.0596993
67	1	12.501	Block676	0.0262782	-0.013895	0.00863858	0.0596993
68	1	12.501	Block674	0.0262782	-0.013895	0.00863858	0.0596993
69	1	13.001	Block691	0.0414523	-0.0183077	0.0159565	0.119827
70	1	13.001	Block1013	0.0414523	-0.0183077	0.0159565	0.119827
71	1	13.706	Block1025	0.0713065	-0.0231654	-0.0129243	0.157708
72	1	14.206	Block1064	0.307331	-0.0495591	-0.0679718	1.19827
73	1	15.207	Block1045	0.158101	-0.051527	-0.0673611	1.23854
74	1	15.207	Block1039	0.158101	-0.051527	-0.0673611	1.23854
75	1	15.207	Block1041	0.158101	-0.051527	-0.0673611	1.23854
76	1	15.207	Block1026	0.158101	-0.051527	-0.0673611	1.23854
77	1	15.207	Block1027	0.158101	-0.051527	-0.0673611	1.23854
78	1	15.207	Block1080	0.158101	-0.051527	-0.0673611	1.23854
79	1	15.207	Block1038	0.158101	-0.051527	-0.0673611	1.23854
80	1	15.207	Block1060	0.158101	-0.051527	-0.0673611	1.23854
81	1	15.707	Block1103	0.296805	-0.0584219	-0.0834371	1.73251
82	1	16.207	Block1082	0.301588	-0.0549767	-0.0903451	1.78293
83	1	16.207	Block1101	0.301588	-0.0549767	-0.0903451	1.78293
84	1	16.207	Block1097	0.301588	-0.0549767	-0.0903451	1.78293
85	1	16.207	Block1090	0.301588	-0.0549767	-0.0903451	1.78293
86	1	16.207	Block1093	0.301588	-0.0549767	-0.0903451	1.78293
87	1	16.207	Block1104	0.301588	-0.0549767	-0.0903451	1.78293
88	1	16.707	Block1111	0.295837	-0.0643673	-0.0730224	1.71572
89	1	17.207	Block1462	0.160664	-0.0520725	-0.0459798	0.952727
90	1	17.707	Block1123	0.15479	-0.0535447	-0.0469254	1.00324
91	1	17.707	Block1505	0.15479	-0.0535447	-0.0469254	1.00324
92	1	17.707	Block1251	0.15479	-0.0535447	-0.0469254	1.00324
93	1	17.707	Block1459	0.15479	-0.0535447	-0.0469254	1.00324
94	1	17.707	Block1159	0.15479	-0.0535447	-0.0469254	1.00324
95	1	17.707	Block1502	0.15479	-0.0535447	-0.0469254	1.00324
96	1	17.707	Block1135	0.15479	-0.0535447	-0.0469254	1.00324
97	1	17.707	Block1508	0.15479	-0.0535447	-0.0469254	1.00324
98	1	18.707	Block1528	0.203379	-0.051675	-0.0471301	0.955421
99	1	18.707	Block1488	0.203379	-0.051675	-0.0471301	0.955421
100	1	18.707	Block1125	0.203379	-0.051675	-0.0471301	0.955421
101	1	18.707	Block1522	0.203379	-0.051675	-0.0471301	0.955421
102	1	19.207	Block1381	0.241107	-0.0385723	-0.0716263	1.01641
103	1	19.207	Block1523	0.241107	-0.0385723	-0.0716263	1.01641
104	1	19.207	Block1271	0.241107	-0.0385723	-0.0716263	1.01641
105	1	19.207	Block1526	0.241107	-0.0385723	-0.0716263	1.01641
106	1	19.707	Block1268	0.16154	-0.0227104	-0.0408377	0.338525
107	1	20.207	Block1405	0.133384	-0.020582	-0.0443635	0.352773
108	1	20.207	Block1399	0.133384	-0.020582	-0.0443635	0.352773
109	1	20.707	Block1446	0.129458	-0.0168284	-0.0356074	0.229856
110	1	21.707	Block1415	0.247183	-0.00668911	-0.0663134	0.564018
111	1	21.707	Block1450	0.247183	-0.00668911	-0.0663134	0.564018
112	1	21.707	Block1411	0.247183	-0.00668911	-0.0663134	0.564018
113	1	21.707	Block1412	0.247183	-0.00668911	-0.0663134	0.564018
114	1	22.707	Block1768	0.400069	-0.0341667	-0.082319	1.14132
115	1	23.207	Block1729	0.333819	-0.0447262	-0.0625334	0.994294
116	1	23.707	Block1671	0.397119	-0.0494043	-0.0700069	1.22931
117	1	23.707	Block1762	0.397119	-0.0494043	-0.0700069	1.22931
118	1	23.707	Block1766	0.397119	-0.0494043	-0.0700069	1.22931
119	1	24.207	Block1684	0.289425	-0.0455962	-0.0602094	0.978791
120	1	24.207	Block1751	0.289425	-0.0455962	-0.0602094	0.978791
121	1	24.207	Block1606	0.289425	-0.0455962	-0.0602094	0.978791
122	1	24.207	Block1618	0.289425	-0.0455962	-0.0602094	0.978791
123	1	24.207	Block1607	0.289425	-0.0455962	-0.0602094	0.978791
124	1	24.207	Block1626	0.289425	-0.0455962	-0.0602094	0.978791
125	1	24.207	Block1625	0.289425	-0.0455962	-0.0602094	0.978791
126	1	24.207	Block1622	0.289425	-0.0455962	-0.0602094	0.978791
127	1	24.207	Block1670	0.289425	-0.0455962	-0.0602094	0.978791
128	1	24.707	Block1637	0.291166	-0.0546356	-0.0445382	1.00647
129	1	25.207	Block1752	0.288457	-0.0524573	-0.048326	0.990292
130	1	25.207	Block1629	0.288457	-0.0524573	-0.048326	0.990292
131	1	25.707	Block1628	0.294457	-0.0442848	-0.062173	0.978727
132	1	26.207	Block1754	0.292872	-0.0537536	-0.0461812	1.00042
133	1	26.707	Block1845	0.301759	-0.0576181	-0.0394569	1.03959
134	1	26.707	Block1847	0.301759	-0.0576181	-0.0394569	1.03959
135	1	27.707	Block1856	0.206315	-0.0471694	-0.0189465	0.613513
136	1	28.207	Block1840	0.284219	-0.0639053	-0.0496947	1.34691
137	1	28.207	Block1841	0.284219	-0.0639053	-0.0496947	1.34691
138	1	28.207	Block1833	0.284219	-0.0639053	-0.0496947	1.34691
139	1	28.207	Block1817	0.284219	-0.0639053	-0.0496947	1.34691
140	1	28.207	Block1832	0.284219	-0.0639053	-0.0496947	1.34691
141	1	28.707	Block1781	0.214617	-0.0539108	-0.0291051	0.847131
142	1	29.708	Block1870	0.162424	-0.0414167	-0.0294228	0.544663
143	1	30.208	Block1780	0.168111	-0.0369365	-0.037227	0.519152
144	1	30.208	Block1873	0.168111	-0.0369365	-0.037227	0.519152
145	1	30.208	Block1881	0.168111	-0.0369365	-0.037227	0.519152
146	1	30.208	Block1884	0.168111	-0.0369365	-0.037227	0.519152
147	1	30.708	Block1890	0.164909	-0.0418333	-0.0286975	0.548363
148	1	30.708	Block1895	0.164909	-0.0418333	-0.0286975	0.548363
149	1	30.708	Block1905	0.164909	-0.0418333	-0.0286975	0.548363
150	1	30.708	Block1917	0.164909	-0.0418333	-0.0286975	0.548363
151	1	30.708	Block1882	0.164909	-0.0418333	-0.0286975	0.548363
152	1	30.708	Block1901	0.164909	-0.0418333	-0.0286975	0.548363
153	1	31.208	Block1903	0.0740908	-0.0308386	-0.00774127	0.25115
154	1	32.208	Block1918	0.0127887	-0.0126944	0.027154	0.13619
155	1	33.208	Block1923	0.0043802	-0.00924359	0.0345363	0.174025
156	1	33.208	Block1922	0.0043802	-0.00924359	0.0345363	0.174025
157	1	33.708	Block1924	0.0528417	0.00850202	0.00349228	0.019996
158	1	34.208	Block1927	0.0160092	0.0054416	0.00864698	0.01682
159	1	35.208	Block1931	0.0600898	0.025454	0.020537	0.217373
160	1	35.708	Block1947	0.0474873	0.0131511	-0.00442845	0.0472761
161	1	35.708	Block1926	0.0474873	0.0131511	-0.00442845	0.0472761
162	1	37.208	Block1936	0.0868894	-0.0183138	0.0626395	0.586935
163	1	37.208	Block1933	0.0868894	-0.0183138	0.0626395	0.586935
164	1	37.208	Block1942	0.0868894	-0.0183138	0.0626395	0.586935
165	1	37.208	Block1940	0.0868894	-0.0183138	0.0626395	0.586935
166	1	37.708	Block1977	0.055988	-0.0136111	0.0533025	0.409655
167	1	37.708	Block1955	0.055988	-0.0136111	0.0533025	0.409655
168	1	38.209	Block1944	0.083251	-0.00993386	0.061614	0.50729
169	1	38.209	Block1941	0.083251	-0.00993386	0.061614	0.50729
170	1	38.709	Block1980	0.124432	-0.0154261	0.0724957	0.729723
171	1	39.209	Block1984	0.106489	-0.0167576	0.0687306	0.673847
172	1	39.209	Block1978	0.106489	-0.0167576	0.0687306	0.673847
173	1	39.709	Block2100	0.0469714	-0.0257557	0.0501052	0.493797
174	1	41.209	Block2105	0.0102804	-0.0217381	-0.0136564	0.143679
175	1	41.709	Block2192	0.0399337	-0.000422414	0.0316776	0.12669
176	1	41.709	Block2110	0.0399337	-0.000422414	0.0316776	0.12669
177	1	42.914	Block2495	0.00315148	-0.00589286	0.0247643	0.0870175
178	1	43.414	Block2283	0.0129687	-0.0116585	0.0125592	0.0556037
179	1	43.414	Block2236	0.0129687	-0.0116585	0.0125592	0.0556037
180	1	43.914	Block2540	0.0449114	0.000451933	-0.0101478	0.0130649
181	1	43.914	Block2357	0.0449114	0.000451933	-0.0101478	0.0130649
182	1	43.914	Block2281	0.0449114	0.000451933	-0.0101478	0.0130649
183	1	43.914	Block2280	0.0449114	0.000451933	-0.0101478	0.0130649
184	1	43.914	Block2267	0.0449114	0.000451933	-0.0101478	0.0130649
185	1	43.914	Block2541	0.0449114	0.000451933	-0.0101478	0.0130649
186	1	43.914	Block2228	0.0449114	0.000451933	-0.0101478	0.0130649
187	1	44.914	Block2235	0.00423242	-0.00787302	0.0210952	0.0729085
188	1	45.915	Block2177	0.0190369	0.00993469	0.0107933	0.039567
189	1	45.915	Block2493	0.0190369	0.00993469	0.0107933	0.039567
190	1	45.915	Block2172	0.0190369	0.00993469	0.0107933	0.039567
191	1	45.915	Block2491	0.0190369	0.00993469	0.0107933	0.039567
192	1	45.915	Block2494	0.0190369	0.00993469	0.0107933	0.039567
193	1	45.915	Block2273	0.0190369	0.00993469	0.0107933	0.039567
194	1	45.915	Block2178	0.0190369	0.00993469	0.0107933	0.039567
195	1	46.415	Block2144	0.00984784	-0.0021757	0.0332665	0.14117
196	1	46.415	Block2150	0.00984784	-0.0021757	0.0332665	0.14117
197	1	46.415	Block2166	0.00984784	-0.0021757	0.0332665	0.14117
198	1	46.415	Block2168	0.00984784	-0.0021757	0.0332665	0.14117
199	1	46.415	Block2148	0.00984784	-0.0021757	0.0332665	0.14117
200	1	46.415	Block2152	0.00984784	-0.0021757	0.0332665	0.14117
201	1	46.415	Block2556	0.00984784	-0.0021757	0.0332665	0.14117
202	1	46.415	Block2187	0.00984784	-0.0021757	0.0332665	0.14117
203	1	47.415	Block2161	0.184639	0.0132628	0.0638323	0.555052
204	1	47.415	Block2581	0.184639	0.0132628	0.0638323	0.555052
205	1	47.415	Block2542	0.184639	0.0132628	0.0638323	0.555052
206	1	47.415	Block2543	0.184639	0.0132628	0.0638323	0.555052
207	1	48.915	Block2582	0.0970691	0.0155159	0.0638051	0.570593
208	1	49.915	Block2606	0.363182	0.054971	0.109483	2.25996
209	1	50.415	Block2599	0.359107	0.0422083	0.088572	1.42961
210	1	50.415	Block2594	0.359107	0.0422083	0.088572	1.42961
211	1	50.415	Block2608	0.359107	0.0422083	0.088572	1.42961
212	1	50.415	Block2603	0.359107	0.0422083	0.088572	1.42961
213	1	50.915	Block2609	0.377345	0.0546528	0.0673071	1.32202
214	1	51.415	Block2615	0.32509	0.0571256	0.0696307	1.43182
215	1	51.915	Block2616	0.361846	0.0695751	0.0472687	1.51146
216	1	51.915	Block2612	0.361846	0.0695751	0.0472687	1.51146
217	1	52.415	Block2625	0.291738	0.0667424	0.0400455	1.33557
218	1	53.416	Block2617	0.229066	0.0757937	0.0140727	1.49826
219	1	53.416	Block2623	0.229066	0.0757937	0.0140727	1.49826
220	1	53.416	Block2621	0.229066	0.0757937	0.0140727	1.49826
221	1	53.416	Block2620	0.229066	0.0757937	0.0140727	1.49826
222	1	53.416	Block2624	0.229066	0.0757937	0.0140727	1.49826
223	1	53.416	Block2626	0.229066	0.0757937	0.0140727	1.49826
224	1	53.416	Block2619	0.229066	0.0757937	0.0140727	1.49826
225	1	53.416	Block2618	0.229066	0.0757937	0.0140727	1.49826
226	1	54.416	Block2628	0.185576	0.0785833	0.0196067	1.63027
227	1	54.916	Block2627	0.240446	0.0776051	0.0203354	1.59443
228	1	54.916	Block2630	0.240446	0.0776051	0.0203354	1.59443
229	1	55.416	Block2629	0.274837	0.0780571	0.0200377	1.61109
230	1	56.416	Block2634	0.206752	0.0676329	0.00452877	1.17837
231	1	57.416	Block2644	0.0806231	0.0501111	0.0361992	0.802627
232	1	58.416	Block2647	0.04999	0.0581481	0.0191068	0.910803
233	1	59.416	Block2645	0.022071	0.0430077	0.0505751	0.787949
234	1	59.416	Block2680	0.022071	0.0430077	0.0505751	0.787949
235	1	59.916	Block2648	0.171236	0.0573511	0.0800163	1.63148
236	1	59.916	Block2649	0.171236	0.0573511	0.0800163	1.63148
237	1	59.916	Block2660	0.171236	0.0573511	0.0800163	1.63148
238	1	59.916	Block2650	0.171236	0.0573511	0.0800163	1.63148
239	1	60.416	Block2677	0.175023	0.0642323	0.0648328	1.57149
240	1	60.916	Block2672	0.00881135	0.0378254	0.012631	0.386008
241	1	60.916	Block2670	0.00881135	0.0378254	0.012631	0.386008
242	1	60.916	Block2679	0.00881135	0.0378254	0.012631	0.386008
243	1	60.916	Block2676	0.00881135	0.0378254	0.012631	0.386008
244	1	60.916	Block2674	0.00881135	0.0378254	0.012631	0.386008
245	1	60.916	Block2671	0.00881135	0.0378254	0.012631	0.386008
246	1	60.916	Block2675	0.00881135	0.0378254	0.012631	0.386008
247	1	61.416	Block2946	0.00207525	0.0327929	0.00396078	0.278115
248	1	61.416	Block2668	0.00207525	0.0327929	0.00396078	0.278115
249	1	61.916	Block2669	0.000854237	0.0252517	0.0210395	0.217326
250	1	61.916	Block2951	0.000854237	0.0252517	0.0210395	0.217326
251	1	65.02	Block2957	0.0403901	-0.00445707	-0.0235985	0.0748386
252	1	65.52	Block2896	0.0329704	-0.00833333	-0.0135078	0.0403321
253	1	67.021	Block2897	0.137832	-0.0176517	0.0384752	0.270285
254	1	67.021	Block2956	0.137832	-0.0176517	0.0384752	0.270285
255	1	67.021	Block2895	0.137832	-0.0176517	0.0384752	0.270285
256	1	67.521	Block2832	0.153855	-0.0315483	0.0105281	0.271792
257	1	67.521	Block3030	0.153855	-0.0315483	0.0105281	0.271792
258	1	68.021	Block2893	0.232081	-0.0411266	0.0321016	0.571848
259	1	68.021	Block3032	0.232081	-0.0411266	0.0321016	0.571848
260	1	69.021	Block3042	0.221072	-0.0317326	0.050481	0.588541
261	1	69.521	Block3037	0.101179	-0.0319981	0.052951	0.625578
262	1	69.521	Block3044	0.101179	-0.0319981	0.052951	0.625578
263	1	70.021	Block3045	0.102501	-0.0292677	0.0480556	0.518727
264	1	70.021	Block3046	0.102501	-0.0292677	0.0480556	0.518727
265	1	70.021	Block3047	0.102501	-0.0292677	0.0480556	0.518727
266	1	70.021	Block3059	0.102501	-0.0292677	0.0480556	0.518727
267	1	70.521	Block3078	0.117334	-0.0283158	0.0504627	0.534644
268	1	71.021	Block3079	0.126223	-0.0339646	0.0386616	0.491951
269	1	71.021	Block3082	0.126223	-0.0339646	0.0386616	0.491951
270	1	72.021	Block3090	0.129936	-0.0369673	0.0425536	0.587924
271	1	72.521	Block3092	0.109669	-0.0305354	0.0262188	0.330654
272	1	74.227	Block3098	0.24426	-0.0473045	-0.000350312	0.575873
273	1	74.227	Block3129	0.24426	-0.0473045	-0.000350312	0.575873
274	1	74.227	Block3093	0.24426	-0.0473045	-0.000350312	0.575873
275	1	74.227	Block3091	0.24426	-0.0473045	-0.000350312	0.575873
276	1	74.727	Block3136	0.22321	-0.0500859	0.0049827	0.650024
277	1	74.727	Block3127	0.22321	-0.0500859	0.0049827	0.650024
278	1	74.727	Block3135	0.22321	-0.0500859	0.0049827	0.650024
279	1	74.727	Block3133	0.22321	-0.0500859	0.0049827	0.650024
280	1	74.727	Block3099	0.22321	-0.0500859	0.0049827	0.650024
281	1	74.727	Block3134	0.22321	-0.0500859	0.0049827	0.650024
282	1	74.727	Block3131	0.22321	-0.0500859	0.0049827	0.650024
283	1	75.227	Block3139	0.0929714	-0.0427302	0.0197143	0.52313
284	1	75.227	Block3125	0.0929714	-0.0427302	0.0197143	0.52313
285	1	75.227	Block3140	0.0929714	-0.0427302	0.0197143	0.52313
286	1	75.727	Block3138	0.0818258	-0.0385769	0.00937055	0.395889
287	1	75.727	Block3137	0.0818258	-0.0385769	0.00937055	0.395889
288	1	75.727	Block3141	0.0818258	-0.0385769	0.00937055	0.395889
289	1	76.727	Block3120	0.349442	-0.0749343	-0.0431282	1.66386
290	1	76.727	Block3123	0.349442	-0.0749343	-0.0431282	1.66386
291	1	77.227	Block3121	0.444751	-0.0792657	-0.0543575	1.96852
292	1	77.727	Block3147	0.305031	-0.0721397	-0.0380176	1.50818
293	1	78.727	Block3149	0.468954	-0.0883123	-0.0322932	2.12475
294	1	79.727	Block3148	0.486055	-0.0827424	-0.00652257	1.76479
295	1	80.232	Block3145	0.432211	-0.0789528	-0.000913913	1.60413
296	1	80.732	Block3151	0.349047	-0.0739762	0.0117738	1.43029
297	1	81.733	Block3150	0.267848	-0.0755825	0.0307656	1.60123
298	1	82.233	Block3157	0.181382	-0.0664848	0.0123166	1.16086
299	1	82.733	Block3158	0.210382	-0.0708124	0.0202316	1.34932
300	1	82.733	Block4494	0.210382	-0.0708124	0.0202316	1.34932
301	1	82.733	Block3152	0.210382	-0.0708124	0.0202316	1.34932
302	1	83.233	Block4497	0.198549	-0.066596	0.0125695	1.16555
303	1	83.733	Block4490	0.23404	-0.0787857	-0.00916071	1.60461
304	1	83.733	Block4495	0.23404	-0.0787857	-0.00916071	1.60461
305	1	84.733	Block4483	0.408154	-0.0951794	-0.00830207	2.3364
306	1	86.734	Block3301	0.409388	-0.0677056	0.0613569	1.67526
307	1	88.234	Block3302	0.592801	-0.0793201	0.0586665	2.0765
308	1	88.939	Block3307	0.531295	-0.0686858	0.0607895	1.70103
309	1	89.94	Block3304	0.59882	-0.053871	0.087621	1.73871
310	1	89.94	Block3305	0.59882	-0.053871	0.087621	1.73871
311	1	89.94	Block3306	0.59882	-0.053871	0.087621	1.73871
312	1	90.44	Block3303	0.509465	-0.0637004	0.0605358	1.5257
313	1	90.945	Block3309	0.503265	-0.0652458	0.0576475	1.53346
314	1	91.945	Block3314	0.659412	-0.048236	0.0990094	1.85901
315	1	92.945	Block3316	0.76086	-0.0648232	0.0918316	2.17471
316	1	95.447	Block3449	0.673635	-0.0565476	0.106786	2.29127
317	1	95.947	Block3357	0.592116	-0.0526499	0.0998605	1.99735
318	1	96.947	Block3323	0.643522	-0.0725505	0.0768703	2.12769
319	1	97.447	Block3487	0.642984	-0.0683937	0.0852778	2.15012
320	1	99.448	Block3507	0.795337	-0.0747518	0.0883061	2.45448
321	1	99.448	Block3506	0.795337	-0.0747518	0.0883061	2.45448
322	1	100.448	Block3517	0.776142	-0.0720507	0.0823411	2.22071
323	1	100.948	Block3518	0.870056	-0.0773647	0.0905775	2.61004
324	1	105.662	Block3519	0.669726	-0.102308	0.000680124	2.69436
325	1	107.163	Block4513	0.774389	-0.105136	-9.81837e-05	2.84492
326	1	108.163	Block4521	0.804673	-0.134725	0.0405978	4.90656
327	1	109.763	Block4130	0.597786	-0.122858	0.0146814	3.921
328	1	111.364	Block4552	1.33482	-0.172986	0.0738857	8.45368
329	1	111.864	Block4348	1.49466	-0.169133	0.0792	8.22008
330	1	112.364	Block3558	1.50196	-0.175903	0.0688152	8.62097
331	1	112.364	Block4274	1.50196	-0.175903	0.0688152	8.62097
332	1	112.864	Block3557	1.34129	-0.180217	0.0631159	8.91798
333	1	113.364	Block3908	1.37999	-0.179924	0.0653494	8.92889
334	1	113.364	Block3555	1.37999	-0.179924	0.0653494	8.92889
335	1	113.364	Block3559	1.37999	-0.179924	0.0653494	8.92889
336	1	113.364	Block4607	1.37999	-0.179924	0.0653494	8.92889
337	1	113.364	Block39058	1.37999	-0.179924	0.0653494	8.92889
338	1	113.364	Block3573	1.37999	-0.179924	0.0653494	8.92889
339	1	113.364	Block4604	1.37999	-0.179924	0.0653494	8.92889
340	1	113.364	Block3561	1.37999	-0.179924	0.0653494	8.92889
341	1	113.364	Block3560	1.37999	-0.179924	0.0653494	8.92889
342	1	113.364	Block4558	1.37999	-0.179924	0.0653494	8.92889
343	1	113.364	Block42889	1.37999	-0.179924	0.0653494	8.92889
344	1	113.364	Block4559	1.37999	-0.179924	0.0653494	8.92889
345	1	113.364	Block3563	1.37999	-0.179924	0.0653494	8.92889
346	1	113.364	Block4556	1.37999	-0.179924	0.0653494	8.92889
347	1	114.364	Block40481	1.18404	-0.159621	0.0989858	7.87183
348	1	114.364	Block40482	1.18404	-0.159621	0.0989858	7.87183
349	1	114.864	Block40197	1.48509	-0.178095	0.069993	8.84313
350	1	114.864	Block4588	1.48509	-0.178095	0.069993	8.84313
351	1	114.864	Block4589	1.48509	-0.178095	0.069993	8.84313
352	1	115.369	Block4587	1.48509	-0.178095	0.069993	8.84313
353	1	116.074	Block4241	1.99766	-0.208636	0.0177815	11.2617
354	1	116.074	Block4143	1.99766	-0.208636	0.0177815	11.2617
355	1	116.074	Block4590	1.99766	-0.208636	0.0177815	11.2617
356	1	116.574	Block4142	1.65215	-0.190303	-0.00323232	9.3193
357	1	118.175	Block4464	1.70724	-0.174589	-0.0170226	7.86706
358	1	120.777	Block9852	1.61305	-0.150654	-0.0430556	6.04336
359	1	123.881	Block7413	1.12569	-0.115229	-0.0672594	3.94972
360	1	127.99	Block16068	1.12114	-0.107174	-0.0783103	3.68835
361	1	128.49	Block30194	1.22747	-0.110139	-0.0888986	4.07059
362	1	128.99	Block6301	1.09468	-0.0982	-0.0674857	3.02366
363	1	129.491	Block10789	0.860879	-0.0980128	-0.0711023	3.07574
364	1	129.491	Block17548	0.860879	-0.0980128	-0.0711023	3.07574
365	1	129.491	Block36257	0.860879	-0.0980128	-0.0711023	3.07574
366	1	129.491	Block16064	0.860879	-0.0980128	-0.0711023	3.07574
367	1	129.491	Block11492	0.860879	-0.0980128	-0.0711023	3.07574
368	1	129.491	Block16060	0.860879	-0.0980128	-0.0711023	3.07574
369	1	130.491	Block31613	1.29786	-0.106806	-0.0818443	3.73773
370	1	130.491	Block21325	1.29786	-0.106806	-0.0818443	3.73773
371	1	130.491	Block7423	1.29786	-0.106806	-0.0818443	3.73773
372	1	130.491	Block28861	1.29786	-0.106806	-0.0818443	3.73773
373	1	130.491	Block18701	1.29786	-0.106806	-0.0818443	3.73773
374	1	130.491	Block9931	1.29786	-0.106806	-0.0818443	3.73773
375	1	130.491	Block26314	1.29786	-0.106806	-0.0818443	3.73773
376	1	130.491	Block24781	1.29786	-0.106806	-0.0818443	3.73773
377	1	130.491	Block25334	1.29786	-0.106806	-0.0818443	3.73773
378	1	130.491	Block24482	1.29786	-0.106806	-0.0818443	3.73773
379	1	130.491	Block12446	1.29786	-0.106806	-0.0818443	3.73773
380	1	130.491	Block25392	1.29786	-0.106806	-0.0818443	3.73773
381	1	130.491	Block25912	1.29786	-0.106806	-0.0818443	3.73773
382	1	130.491	Block11039	1.29786	-0.106806	-0.0818443	3.73773
383	1	130.491	Block23159	1.29786	-0.106806	-0.0818443	3.73773
384	1	130.491	Block25154	1.29786	-0.106806	-0.0818443	3.73773
385	1	130.491	Block11291	1.29786	-0.106806	-0.0818443	3.73773
386	1	130.491	Block10162	1.29786	-0.106806	-0.0818443	3.73773
387	1	130.491	Block24831	1.29786	-0.106806	-0.0818443	3.73773
388	1	130.491	Block35093	1.29786	-0.106806	-0.0818443	3.73773
389	1	130.491	Block9791	1.29786	-0.106806	-0.0818443	3.73773
390	1	130.491	Block17890	1.29786	-0.106806	-0.0818443	3.73773
391	1	130.491	Block22513	1.29786	-0.106806	-0.0818443	3.73773
392	1	130.491	Block11523	1.29786	-0.106806	-0.0818443	3.73773
393	1	130.491	Block26549	1.29786	-0.106806	-0.0818443	3.73773
394	1	130.491	Block12942	1.29786	-0.106806	-0.0818443	3.73773
395	1	130.491	Block15535	1.29786	-0.106806	-0.0818443	3.73773
396	1	130.491	Block41301	1.29786	-0.106806	-0.0818443	3.73773
397	1	130.991	Block26397	1.32661	-0.0995333	-0.0704063	3.14044
398	1	130.991	Block26120	1.32661	-0.0995333	-0.0704063	3.14044
399	1	130.991	Block32759	1.32661	-0.0995333	-0.0704063	3.14044
400	1	130.991	Block26104	1.32661	-0.0995333	-0.0704063	3.14044
401	1	130.991	Block29887	1.32661	-0.0995333	-0.0704063	3.14044
402	1	130.991	Block16527	1.32661	-0.0995333	-0.0704063	3.14044
403	1	130.991	Block20391	1.32661	-0.0995333	-0.0704063	3.14044
404	1	130.991	Block16738	1.32661	-0.0995333	-0.0704063	3.14044
405	1	130.991	Block24438	1.32661	-0.0995333	-0.0704063	3.14044
406	1	131.991	Block10811	0.832237	-0.0897333	-0.0489397	2.35282
407	1	131.991	Block12800	0.832237	-0.0897333	-0.0489397	2.35282
408	1	131.991	Block5875	0.832237	-0.0897333	-0.0489397	2.35282
409	1	131.991	Block5706	0.832237	-0.0897333	-0.0489397	2.35282
410	1	131.991	Block10156	0.832237	-0.0897333	-0.0489397	2.35282
411	1	132.991	Block43416	0.661704	-0.0831481	-0.0403981	1.96866
412	1	133.991	Block42579	1.12558	-0.0931034	-0.0720508	2.85267
413	1	134.491	Block42585	1.30193	-0.103571	-0.093315	3.81149
414	1	135.992	Block42637	1.2873	-0.0892036	-0.128257	4.06642
415	1	137.492	Block42827	1.14261	-0.0697655	-0.0727234	1.89474
416	1	138.992	Block42819	0.950541	-0.058804	-0.104807	2.24509
417	1	140.198	Block43439	0.340378	-0.0272194	-0.0676861	0.759477
418	1	140.698	Block43448	0.340929	-0.0181784	-0.0871475	1.03521
419	1	141.698	Block43519	0.262595	-0.0192348	-0.0620269	0.574626
420	1	141.698	Block43453	0.262595	-0.0192348	-0.0620269	0.574626
421	1	142.198	Block43533	0.0581155	0.0126394	-0.00161958	0.0415494
422	1	142.698	Block43527	0.0500231	0.0165035	-0.00970314	0.0827693
423	1	142.698	Block43596	0.0500231	0.0165035	-0.00970314	0.0827693
424	1	143.198	Block43598	0.0453418	0.0168895	-0.00913614	0.0847106
425	1	143.698	Block43599	0.00949437	0.0215641	-0.00107983	0.119946
426	1	143.698	Block43614	0.00949437	0.0215641	-0.00107983	0.119946
427	1	144.198	Block43580	0.0316713	0.0160958	-0.0105708	0.0816175
428	1	144.698	Block43634	0.2428	-0.0172086	-0.0725002	0.733076
429	1	144.698	Block43588	0.2428	-0.0172086	-0.0725002	0.733076
430	1	145.198	Block43611	0.171211	-0.0113645	-0.0602106	0.487154
431	1	145.198	Block43630	0.171211	-0.0113645	-0.0602106	0.487154
432	1	145.698	Block43645	0.0968591	-0.00402681	-0.0479459	0.29319
433	1	146.198	Block43570	0.143659	-0.0100153	-0.0577717	0.443955
434	1	146.198	Block43637	0.143659	-0.0100153	-0.0577717	0.443955
435	1	147.198	Block43566	0.0593324	0.0123657	-0.0173138	0.0782276
436	1	148.198	Block43568	0.0946337	-0.00539072	0.018199	0.0497429
437	1	148.198	Block43573	0.0946337	-0.00539072	0.018199	0.0497429
438	1	148.198	Block43798	0.0946337	-0.00539072	0.018199	0.0497429
439	1	148.698	Block43565	0.116852	-0.00977564	0.0102631	0.0383786
440	1	149.198	Block43799	0.224651	-0.021978	-0.0117857	0.140562
441	1	151.801	Block43800	0.0943223	-0.000659091	-0.0136655	0.0236233
442	1	152.801	Block43828	0.0123404	0.0276011	0.0674282	0.760373
443	1	154.301	Block43826	0.138626	0.0112895	0.0926228	1.10979
444	1	155.301	Block43878	0.240682	0.00174951	0.0915599	1.05746
445	1	155.301	Block44181	0.240682	0.00174951	0.0915599	1.05746
446	1	157.007	Block43851	0.428117	-0.0447083	0.0940681	1.65145
447	1	157.007	Block44350	0.428117	-0.0447083	0.0940681	1.65145
448	1	157.507	Block43850	0.408033	-0.0401206	0.100609	1.71106
449	1	160.711	Block44184	0.746048	-0.0813889	0.0992025	2.98622
450	1	161.211	Block44660	0.752148	-0.0846212	0.0939307	2.99527
451	1	161.211	Block44329	0.752148	-0.0846212	0.0939307	2.99527
452	1	162.712	Block43933	0.738495	-0.0353758	0.122234	2.22817
453	1	162.712	Block43934	0.738495	-0.0353758	0.122234	2.22817
454	1	163.212	Block44358	0.270104	0.00805556	0.0541374	0.384244
455	1	163.212	Block44661	0.270104	0.00805556	0.0541374	0.384244
456	1	163.712	Block44261	0.146017	0.0273693	0.0227073	0.254763
457	1	163.712	Block1211	0.146017	0.0273693	0.0227073	0.254763
458	1	163.712	Block44260	0.146017	0.0273693	0.0227073	0.254763
459	1	163.712	Block44269	0.146017	0.0273693	0.0227073	0.254763
460	1	164.212	Block44355	0.243521	0.0401804	0.0476348	0.692282
461	2	0	Block61625	0.109819	0.057109	0.0392819	1.02297
462	2	0	Block61629	0.109819	0.057109	0.0392819	1.02297
463	2	0.5	Block48546	0.0738594	0.05595	0.0352648	0.952807
464	2	1	Block72020	0.0654162	0.0531667	0.0283939	0.821759
465	2	1	Block68104	0.0654162	0.0531667	0.0283939	0.821759
466	2	1	Block59012	0.0654162	0.0531667	0.0283939	0.821759
467	2	1.5	Block49551	0.0655694	0.0498514	0.0208991	0.689569
468	2	1.5	Block61347	0.0655694	0.0498514	0.0208991	0.689569
469	2	2	Block49545	0.0771153	0.0491136	0.0183505	0.658853
470	2	3	Block45666	0.0667762	0.044947	0.0109674	0.532698
471	2	3	Block54071	0.0667762	0.044947	0.0109674	0.532698
472	2	3	Block47339	0.0667762	0.044947	0.0109674	0.532698
473	2	3	Block62333	0.0667762	0.044947	0.0109674	0.532698
474	2	3	Block65802	0.0667762	0.044947	0.0109674	0.532698
475	2	3	Block46490	0.0667762	0.044947	0.0109674	0.532698
476	2	4	Block78484	0.0642279	0.0407045	0.00345016	0.427247
477	2	4	Block71832	0.0642279	0.0407045	0.00345016	0.427247
478	2	4	Block48840	0.0642279	0.0407045	0.00345016	0.427247
479	2	4	Block79057	0.0642279	0.0407045	0.00345016	0.427247
480	2	4	Block67312	0.0642279	0.0407045	0.00345016	0.427247
481	2	4	Block46992	0.0642279	0.0407045	0.00345016	0.427247
482	2	4	Block78160	0.0642279	0.0407045	0.00345016	0.427247
483	2	4	Block59436	0.0642279	0.0407045	0.00345016	0.427247
484	2	4	Block75025	0.0642279	0.0407045	0.00345016	0.427247
485	2	4	Block61219	0.0642279	0.0407045	0.00345016	0.427247
486	2	4	Block67688	0.0642279	0.0407045	0.00345016	0.427247
487	2	4.5	Block67338	0.0718529	0.0274601	-0.0198851	0.246658
488	2	4.5	Block60674	0.0718529	0.0274601	-0.0198851	0.246658
489	2	4.5	Block71493	0.0718529	0.0274601	-0.0198851	0.246658
490	2	4.5	Block48926	0.0718529	0.0274601	-0.0198851	0.246658
491	2	4.5	Block77700	0.0718529	0.0274601	-0.0198851	0.246658
492	2	4.5	Block72114	0.0718529	0.0274601	-0.0198851	0.246658
493	2	4.5	Block59104	0.0718529	0.0274601	-0.0198851	0.246658
494	2	4.5	Block93403	0.0718529	0.0274601	-0.0198851	0.246658
495	2	4.5	Block71094	0.0718529	0.0274601	-0.0198851	0.246658
496	2	5.501	Block55426	0.0688574	0.0462421	0.0122363	0.566447
497	2	5.501	Block71700	0.0688574	0.0462421	0.0122363	0.566447
498	2	5.501	Block52377	0.0688574	0.0462421	0.0122363	0.566447
499	2	5.501	Block47475	0.0688574	0.0462421	0.0122363	0.566447
500	2	5.501	Block71682	0.0688574	0.0462421	0.0122363	0.566447
501	2	5.501	Block64323	0.0688574	0.0462421	0.0122363	0.566447
502	2	5.501	Block67604	0.0688574	0.0462421	0.0122363	0.566447
503	2	5.501	Block48238	0.0688574	0.0462421	0.0122363	0.566447
504	2	5.501	Block60808	0.0688574	0.0462421	0.0122363	0.566447
505	2	5.501	Block69924	0.0688574	0.0462421	0.0122363	0.566447
506	2	5.501	Block47460	0.0688574	0.0462421	0.0122363	0.566447
507	2	5.501	Block47480	0.0688574	0.0462421	0.0122363	0.566447
508	2	5.501	Block63676	0.0688574	0.0462421	0.0122363	0.566447
509	2	5.501	Block62348	0.0688574	0.0462421	0.0122363	0.566447
510	2	5.501	Block78079	0.0688574	0.0462421	0.0122363	0.566447
511	2	5.501	Block71979	0.0688574	0.0462421	0.0122363	0.566447
512	2	5.501	Block47479	0.0688574	0.0462421	0.0122363	0.566447
513	2	5.501	Block54105	0.0688574	0.0462421	0.0122363	0.566447
514	2	5.501	Block78031	0.0688574	0.0462421	0.0122363	0.566447
515	2	5.501	Block71508	0.0688574	0.0462421	0.0122363	0.566447
516	2	5.501	Block71510	0.0688574	0.0462421	0.0122363	0.566447
517	2	5.501	Block73735	0.0688574	0.0462421	0.0122363	0.566447
518	2	5.501	Block44963	0.0688574	0.0462421	0.0122363	0.566447
519	2	5.501	Block78517	0.0688574	0.0462421	0.0122363	0.566447
520	2	5.501	Block65119	0.0688574	0.0462421	0.0122363	0.566447
521	2	5.501	Block73737	0.0688574	0.0462421	0.0122363	0.566447
522	2	5.501	Block60947	0.0688574	0.0462421	0.0122363	0.566447
523	2	5.501	Block78033	0.0688574	0.0462421	0.0122363	0.566447
524	2	5.501	Block49300	0.0688574	0.0462421	0.0122363	0.566447
525	2	5.501	Block67357	0.0688574	0.0462421	0.0122363	0.566447
526	2	5.501	Block45643	0.0688574	0.0462421	0.0122363	0.566447
527	2	5.501	Block54614	0.0688574	0.0462421	0.0122363	0.566447
528	2	5.501	Block56494	0.0688574	0.0462421	0.0122363	0.566447
529	2	6.501	Block95931	0.106554	0.0524278	0.00959055	0.716566
530	2	7.001	Block95963	0.11307	0.0559489	0.0171841	0.83816
531	2	7.501	Block96199	0.106945	0.0521627	0.0113867	0.71373
532	2	7.501	Block96169	0.106945	0.0521627	0.0113867	0.71373
533	2	8.501	Block87531	0.101169	0.0551196	0.0192981	0.823673
534	2	9.001	Block96190	0.160319	0.0568219	0.0156445	0.857482
535	2	9.001	Block96192	0.160319	0.0568219	0.0156445	0.857482
536	2	9.001	Block96187	0.160319	0.0568219	0.0156445	0.857482
537	2	9.501	Block52263	0.122434	0.0501196	0.0278696	0.737592
538	2	9.501	Block56929	0.122434	0.0501196	0.0278696	0.737592
539	2	10.001	Block96245	0.122434	0.0501196	0.0278696	0.737592
540	2	10.001	Block97966	0.122434	0.0501196	0.0278696	0.737592
541	2	10.001	Block96226	0.122434	0.0501196	0.0278696	0.737592
542	2	10.001	Block69299	0.122434	0.0501196	0.0278696	0.737592
543	2	10.001	Block87596	0.122434	0.0501196	0.0278696	0.737592
544	2	10.001	Block67882	0.122434	0.0501196	0.0278696	0.737592
545	2	10.501	Block97427	0.117279	0.048947	0.0244236	0.685959
546	2	10.501	Block96373	0.117279	0.048947	0.0244236	0.685959
547	2	10.501	Block97510	0.117279	0.048947	0.0244236	0.685959
548	2	10.501	Block97665	0.117279	0.048947	0.0244236	0.685959
549	2	10.501	Block97464	0.117279	0.048947	0.0244236	0.685959
550	2	10.501	Block96630	0.117279	0.048947	0.0244236	0.685959
551	2	10.501	Block97519	0.117279	0.048947	0.0244236	0.685959
552	2	11.001	Block96307	0.132715	0.0605198	0.0431118	1.16423
553	2	11.001	Block96610	0.132715	0.0605198	0.0431118	1.16423
554	2	11.501	Block96389	0.0814481	0.0530159	0.0558396	1.10208
555	2	12.001	Block96387	0.0897689	0.055588	0.0512969	1.11312
556	2	12.001	Block96458	0.0897689	0.055588	0.0512969	1.11312
557	2	12.501	Block97629	0.0678397	0.0418939	0.0285909	0.548912
558	2	12.501	Block96946	0.0678397	0.0418939	0.0285909	0.548912
559	2	12.501	Block97632	0.0678397	0.0418939	0.0285909	0.548912
560	2	12.501	Block96540	0.0678397	0.0418939	0.0285909	0.548912
561	2	12.501	Block98601	0.0678397	0.0418939	0.0285909	0.548912
562	2	13.001	Block97635	0.0687039	0.0354776	0.0180141	0.361724
563	2	13.501	Block97634	0.124185	0.0472464	-0.00429861	0.577861
564	2	13.501	Block98599	0.124185	0.0472464	-0.00429861	0.577861
565	2	14.001	Block98435	0.229147	0.0558122	-0.0217626	0.867484
566	2	14.001	Block98595	0.229147	0.0558122	-0.0217626	0.867484
567	2	14.001	Block98819	0.229147	0.0558122	-0.0217626	0.867484
568	2	14.001	Block98479	0.229147	0.0558122	-0.0217626	0.867484
569	2	14.001	Block98438	0.229147	0.0558122	-0.0217626	0.867484
570	2	14.001	Block98579	0.229147	0.0558122	-0.0217626	0.867484
571	2	14.001	Block98436	0.229147	0.0558122	-0.0217626	0.867484
572	2	14.501	Block98830	0.264549	0.0490278	-0.0342647	0.775074
573	2	14.501	Block98832	0.264549	0.0490278	-0.0342647	0.775074
574	2	14.501	Block98839	0.264549	0.0490278	-0.0342647	0.775074
575	2	15.501	Block98843	0.284673	0.0456143	-0.040698	0.753631
576	2	17.502	Block98851	0.270151	0.0504266	-0.0299428	0.775035
577	2	18.002	Block98858	0.220076	0.060285	-0.007209	0.944089
578	2	18.502	Block98862	0.22583	0.0629306	0.000143519	1.01924
579	2	19.502	Block98864	0.226614	0.0621892	-0.0118542	1.01678
580	2	21.003	Block98869	0.221783	0.0677914	-0.0369202	1.36715
581	2	23.004	Block98871	0.236479	0.065987	0.00576248	1.12301
582	2	23.709	Block98881	0.221882	0.0539949	-0.0135089	0.777001
583	2	24.709	Block98888	0.208573	0.0677538	-0.018589	1.23134
584	2	27.417	Block98898	0.16826	0.0593959	0.00133422	0.907832
585	2	28.417	Block98899	0.0957224	0.0567188	0.0084026	0.834542
586	2	30.023	Block98900	0.2321	0.0326073	-0.0451929	0.538572
587	2	31.523	Block98908	0.390057	0.0222109	-0.0831363	1.00794
588	2	32.844	Block98914	0.386955	0.0281884	-0.103396	1.56746
589	2	35.478	Block98918	0.633827	0.0462882	-0.165513	4.04492
590	2	37.479	Block98923	0.412589	0.0232246	-0.131536	2.33637
591	2	38.979	Block98932	0.551792	0.0363301	-0.125051	2.33472
592	2	43.799	Block98941	1.20456	0.0928162	-0.207128	7.72405
593	2	44.799	Block98949	1.16601	0.0865278	-0.221448	8.20763
594	2	46.8	Block98960	1.02487	0.0908909	-0.197575	7.13908
595	2	47.3	Block98952	0.873997	0.0867369	-0.185339	6.34884
596	2	47.8	Block98953	0.910219	0.0834848	-0.196673	6.75422
597	2	48.301	Block98963	0.904255	0.0838914	-0.193149	6.59739
598	2	49.801	Block98951	0.893853	0.0829585	-0.188944	6.35205
599	2	50.801	Block98958	0.941779	0.079337	-0.202213	6.85727
600	2	51.301	Block98962	0.937122	0.0795532	-0.199933	6.7498
601	2	52.802	Block98964	0.88004	0.0869372	-0.186917	6.43273
602	2	54.803	Block98965	0.878644	0.0924341	-0.178901	6.31803
603	2	57.806	Block98967	1.37833	0.0894199	-0.203821	7.38836
604	2	60.308	Block98973	1.64722	0.0873313	-0.231907	8.84707
605	2	61.809	Block98987	1.49611	0.092712	-0.210899	7.91954
606	2	65.315	Block98979	1.45655	0.0993283	-0.19142	7.25533
607	2	65.815	Block98990	1.34228	0.100264	-0.189525	7.21231
608	2	65.815	Block98989	1.34228	0.100264	-0.189525	7.21231
609	2	66.315	Block98991	1.32307	0.103419	-0.173525	6.63978
610	2	66.815	Block99003	1.33553	0.106241	-0.158046	6.13895
611	2	68.215	Block99034	1.07022	0.12353	-0.032692	4.08231
612	2	68.715	Block99035	1.08488	0.125467	-0.0229058	4.13205
613	2	68.715	Block99012	1.08488	0.125467	-0.0229058	4.13205
614	2	69.215	Block99021	1.08052	0.120464	-0.0621373	4.25901
615	2	69.215	Block99017	1.08052	0.120464	-0.0621373	4.25901
616	2	69.715	Block98998	1.10722	0.118573	-0.0731331	4.33619
617	2	70.215	Block98996	1.12368	0.115438	-0.0968599	4.66855
618	2	71.215	Block99032	1.12693	0.115985	-0.0949868	4.65501
619	2	71.215	Block99025	1.12693	0.115985	-0.0949868	4.65501
620	2	71.715	Block99036	1.08638	0.118517	-0.0807385	4.48482
621	2	72.215	Block99043	1.0847	0.115804	-0.0976364	4.70998
622	2	73.215	Block99048	1.09883	0.111598	-0.120862	5.11477
623	2	74.215	Block99053	1.0844	0.107683	-0.139039	5.49705
624	2	74.215	Block99060	1.0844	0.107683	-0.139039	5.49705
625	2	74.215	Block99065	1.0844	0.107683	-0.139039	5.49705
626	2	76.718	Block99070	1.15824	0.100118	-0.164605	6.07909
627	2	80.827	Block99075	1.23365	0.0807315	-0.214784	7.5824
628	2	83.329	Block99079	1.26425	0.0683194	-0.234062	8.19104
629	2	84.329	Block99081	1.16698	0.0744664	-0.211616	7.15392
630	2	86.33	Block99099	1.33763	0.0701552	-0.211108	6.96164
631	2	86.83	Block99101	1.29924	0.0670076	-0.215492	7.08463
632	2	87.33	Block99111	1.40815	0.064184	-0.218902	7.17418
633	2	88.33	Block99106	1.2195	0.0633611	-0.215162	6.94035
634	2	88.83	Block99112	1.2117	0.0704256	-0.202987	6.5447
635	2	89.33	Block99115	0.854724	0.0583209	-0.190131	5.49024
636	2	90.33	Block99116	0.811615	0.0566357	-0.188906	5.37988
637	2	90.83	Block99125	0.794266	0.0569826	-0.185944	5.24944
638	2	91.33	Block99231	1.08297	0.0665675	-0.196168	6.05919
639	2	92.331	Block99184	0.860167	0.0581576	-0.181508	5.07844
640	2	92.331	Block99178	0.860167	0.0581576	-0.181508	5.07844
641	2	92.331	Block99175	0.860167	0.0581576	-0.181508	5.07844
642	2	92.831	Block99230	1.07093	0.0507584	-0.174669	4.55539
643	2	92.831	Block99218	1.07093	0.0507584	-0.174669	4.55539
644	2	94.932	Block99211	0.0454388	-0.0360802	-0.0466358	0.60107
645	2	95.432	Block99205	0.0454388	-0.0360802	-0.0466358	0.60107
646	2	95.932	Block99204	0.0392054	-0.0462216	-0.0294225	0.652342
647	2	96.432	Block99349	0.100174	-0.0626347	-0.064966	1.52198
648	2	96.432	Block99199	0.100174	-0.0626347	-0.064966	1.52198
649	2	96.932	Block99357	0.0998006	-0.0710119	-0.0500642	1.59645
650	2	97.432	Block99348	0.0862469	-0.0740675	-0.044023	1.64031
651	2	97.432	Block99378	0.0862469	-0.0740675	-0.044023	1.64031
652	2	97.932	Block99418	0.0845466	-0.0877543	-0.0174327	2.01279
653	2	97.932	Block99422	0.0845466	-0.0877543	-0.0174327	2.01279
654	2	104.474	Block99416	0.364547	-0.0854289	-0.0833999	2.7205
655	2	104.474	Block99415	0.364547	-0.0854289	-0.0833999	2.7205
656	3	0	Block100162	0.10166	-0.110421	-0.0115867	3.14879
657	3	0	Block100270	0.10166	-0.110421	-0.0115867	3.14879
658	3	0	Block100501	0.10166	-0.110421	-0.0115867	3.14879
659	3	0	Block99708	0.10166	-0.110421	-0.0115867	3.14879
660	3	0	Block100163	0.10166	-0.110421	-0.0115867	3.14879
661	3	0	Block100271	0.10166	-0.110421	-0.0115867	3.14879
662	3	0	Block99526	0.10166	-0.110421	-0.0115867	3.14879
663	3	0	Block100494	0.10166	-0.110421	-0.0115867	3.14879
664	3	0	Block99529	0.10166	-0.110421	-0.0115867	3.14879
665	3	0	Block99710	0.10166	-0.110421	-0.0115867	3.14879
666	3	0	Block100711	0.10166	-0.110421	-0.0115867	3.14879
667	3	0	Block100517	0.10166	-0.110421	-0.0115867	3.14879
668	3	0	Block100266	0.10166	-0.110421	-0.0115867	3.14879
669	3	0	Block99516	0.10166	-0.110421	-0.0115867	3.14879
670	3	0	Block100160	0.10166	-0.110421	-0.0115867	3.14879
671	3	0	Block99697	0.10166	-0.110421	-0.0115867	3.14879
672	3	0	Block100276	0.10166	-0.110421	-0.0115867	3.14879
673	3	0	Block100500	0.10166	-0.110421	-0.0115867	3.14879
674	3	0	Block100263	0.10166	-0.110421	-0.0115867	3.14879
675	3	0	Block100265	0.10166	-0.110421	-0.0115867	3.14879
676	3	0	Block100269	0.10166	-0.110421	-0.0115867	3.14879
677	3	0	Block99531	0.10166	-0.110421	-0.0115867	3.14879
678	3	0.5	Block100713	0.0830982	-0.100582	0.00718944	2.61394
679	3	2.501	Block100497	0.018382	-0.0867553	0.00111309	1.93779
680	3	2.501	Block100758	0.018382	-0.0867553	0.00111309	1.93779
681	3	3.002	Block100848	0.0319319	-0.0938414	0.0180253	2.31588
682	3	4.002	Block100837	0.0303868	-0.0957954	0.0135527	2.39149
683	3	5.022	Block100829	0.0752432	-0.0775471	0.012201	1.57122
684	3	8.126	Block100827	0.13913	-0.0557361	0.0850324	1.73505
685	3	8.126	Block100765	0.13913	-0.0557361	0.0850324	1.73505
686	3	9.126	Block100791	0.0262427	-0.0559057	0.0497091	1.12986
687	3	9.126	Block100850	0.0262427	-0.0559057	0.0497091	1.12986
688	3	10.126	Block100812	0.00560345	-0.0478267	0.0363966	0.764437
689	3	11.127	Block100822	0.0402815	-0.063444	0.0716263	1.7056
690	3	11.127	Block100784	0.0402815	-0.063444	0.0716263	1.7056
691	3	11.627	Block100783	0.00253966	-0.0541605	0.0531808	1.12598
692	3	12.127	Block100776	0.00964968	-0.0462659	0.0726046	1.23248
693	3	13.127	Block100864	0.0244871	-0.0452778	0.0761923	1.27699
694	3	13.627	Block100917	0.0675216	-0.0402414	0.0877586	1.40574
695	3	15.628	Block100866	0.0158517	-0.0267388	0.042804	0.420789
696	3	15.628	Block100923	0.0158517	-0.0267388	0.042804	0.420789
697	3	15.628	Block100774	0.0158517	-0.0267388	0.042804	0.420789
698	3	15.628	Block100918	0.0158517	-0.0267388	0.042804	0.420789
699	3	15.628	Block100781	0.0158517	-0.0267388	0.042804	0.420789
700	3	16.133	Block100929	0.0206553	-0.0140679	0.0443038	0.301611
701	3	16.133	Block100778	0.0206553	-0.0140679	0.0443038	0.301611
702	3	17.338	Block100931	0.039564	-0.00821895	0.0934529	1.12282
703	3	17.838	Block100924	0.0586937	-0.0055007	0.102589	1.33814
704	3	17.838	Block100934	0.0586937	-0.0055007	0.102589	1.33814
705	3	18.338	Block100935	0.0689213	-0.00453571	0.10275	1.33933
706	3	19.839	Block100925	0.0195636	-0.00832956	0.0666202	0.580443
707	3	19.839	Block100937	0.0195636	-0.00832956	0.0666202	0.580443
708	3	20.339	Block100930	0.0200648	-0.0111685	0.0766611	0.777655
709	3	20.339	Block101317	0.0200648	-0.0111685	0.0766611	0.777655
710	3	20.839	Block100932	0.0160393	-0.0145551	0.0837004	0.944258
711	3	20.839	Block101730	0.0160393	-0.0145551	0.0837004	0.944258
712	3	21.339	Block101281	0.00669952	-0.0192627	0.0713794	0.744989
713	3	22.339	Block112147	0.0346602	-0.0198535	0.0479034	0.395611
714	3	22.839	Block101872	0.0234924	-0.0181938	0.0416126	0.307367
715	3	23.339	Block101876	0.0442405	-0.0153225	0.0325084	0.196195
716	3	24.839	Block101782	0.0687807	-0.013635	0.0291051	0.156667
717	3	25.839	Block102401	0.166248	-0.0224579	0.00413882	0.132431
718	3	25.839	Block101789	0.166248	-0.0224579	0.00413882	0.132431
719	3	26.84	Block101753	0.0307688	-0.0257579	0.0324246	0.307512
720	3	27.34	Block109623	0.0543717	-0.0348451	0.0118118	0.332139
721	3	27.84	Block101793	0.128263	-0.0383007	0.00487247	0.381476
722	3	27.84	Block101740	0.128263	-0.0383007	0.00487247	0.381476
723	3	27.84	Block101742	0.128263	-0.0383007	0.00487247	0.381476
724	3	27.84	Block101744	0.128263	-0.0383007	0.00487247	0.381476
725	3	27.84	Block101741	0.128263	-0.0383007	0.00487247	0.381476
726	3	27.84	Block101743	0.128263	-0.0383007	0.00487247	0.381476
727	3	28.34	Block102237	0.135174	-0.0343889	-0.00480556	0.30647
728	3	28.34	Block102235	0.135174	-0.0343889	-0.00480556	0.30647
729	3	28.34	Block102238	0.135174	-0.0343889	-0.00480556	0.30647
730	3	28.34	Block102239	0.135174	-0.0343889	-0.00480556	0.30647
731	3	28.34	Block101794	0.135174	-0.0343889	-0.00480556	0.30647
732	3	28.84	Block101889	0.0465617	-0.0372754	-0.00997455	0.368326
733	3	28.84	Block101888	0.0465617	-0.0372754	-0.00997455	0.368326
734	3	28.84	Block101745	0.0465617	-0.0372754	-0.00997455	0.368326
735	3	29.34	Block113442	0.0102486	-0.0288333	0.00843651	0.224156
736	3	29.84	Block102141	0.00268494	-0.0366176	0.0276642	0.446653
737	3	30.34	Block108873	0.0243493	-0.0518954	-0.00199346	0.693144
738	3	30.84	Block102230	0.00111616	-0.0393676	0.0228676	0.469304
739	3	30.84	Block102037	0.00111616	-0.0393676	0.0228676	0.469304
740	3	30.84	Block101914	0.00111616	-0.0393676	0.0228676	0.469304
741	3	30.84	Block102040	0.00111616	-0.0393676	0.0228676	0.469304
742	3	30.84	Block101912	0.00111616	-0.0393676	0.0228676	0.469304
743	3	30.84	Block102236	0.00111616	-0.0393676	0.0228676	0.469304
744	3	31.34	Block114099	0.0394401	-0.0275311	0.0457498	0.465331
745	3	32.34	Block112666	0.0069734	-0.0430859	0.0152252	0.510281
746	3	32.34	Block112949	0.0069734	-0.0430859	0.0152252	0.510281
747	3	32.34	Block102324	0.0069734	-0.0430859	0.0152252	0.510281
748	3	32.84	Block113487	0.00908404	-0.035557	0.02981	0.442741
749	3	32.84	Block113017	0.00908404	-0.035557	0.02981	0.442741
750	3	32.84	Block114170	0.00908404	-0.035557	0.02981	0.442741
751	3	32.84	Block114357	0.00908404	-0.035557	0.02981	0.442741
752	3	32.84	Block114365	0.00908404	-0.035557	0.02981	0.442741
753	3	32.84	Block114628	0.00908404	-0.035557	0.02981	0.442741
754	3	33.34	Block107958	0.0240301	-0.0201061	-0.00983622	0.115272
755	3	33.84	Block113006	0.0290305	-0.0162063	-0.00143116	0.067743
756	3	34.34	Block114567	0.0340456	-0.0239167	-0.01575	0.17665
757	3	34.84	Block109945	0.0262752	-0.0162105	-0.000654971	0.0676358
758	3	35.34	Block117707	0.0255671	-0.0209167	-0.0100227	0.124239
759	3	35.84	Block116336	0.0238247	-0.0138241	-0.0287379	0.151396
760	3	36.34	Block117712	0.0833943	-0.0305214	-0.0588884	0.668307
761	3	36.84	Block117711	0.140856	-0.0414907	-0.082141	1.2773
762	3	37.84	Block116125	0.113767	-0.0508426	-0.0571303	1.06265
763	3	38.34	Block117730	0.140134	-0.0447738	-0.072711	1.16675
764	3	38.84	Block117715	0.149253	-0.0511422	-0.0560986	1.05596
765	3	39.84	Block117725	0.0695516	-0.0708021	-0.00945678	1.29819
766	3	42.944	Block117731	0.078471	-0.0895962	0.020832	2.13007
767	3	43.944	Block115604	0.0893349	-0.104986	0.0456376	3.12327
768	3	44.444	Block113239	0.122753	-0.114264	0.0598478	3.84606
769	3	45.945	Block115601	0.297706	-0.128333	0.0746017	4.98826
770	3	46.445	Block115600	0.399	-0.141934	0.0934342	6.35177
771	3	46.945	Block115803	0.411608	-0.151028	0.104036	7.31364
772	3	47.445	Block114705	0.435458	-0.114971	0.16295	6.84415
773	3	47.945	Block114719	0.326964	-0.0983695	0.132978	4.7858
774	3	48.445	Block114722	0.173487	-0.0841374	0.114214	3.51502
775	3	48.945	Block114740	0.127814	-0.0894479	0.119242	3.90556
776	3	49.445	Block114704	0.0515506	-0.0807346	0.102911	3.05463
777	3	49.945	Block114751	0.215853	-0.0942518	0.126638	4.36838
778	3	50.445	Block117846	0.393079	-0.110005	0.146817	5.91348
779	3	50.945	Block117847	0.413846	-0.117979	0.134365	5.93823
780	3	51.445	Block117852	0.372016	-0.151939	0.077664	6.76095
781	3	51.945	Block117836	0.151662	-0.138571	0.0542857	5.35113
782	3	51.945	Block117856	0.151662	-0.138571	0.0542857	5.35113
783	3	51.945	Block117837	0.151662	-0.138571	0.0542857	5.35113
784	3	54.046	Block117937	0.211654	-0.169905	0.0343638	7.60779
785	3	54.546	Block117936	0.281926	-0.18374	0.0133433	8.72379
786	3	55.546	Block117939	0.498824	-0.197143	0.0413571	10.2592
787	3	56.547	Block117853	0.483035	-0.209643	0.0613571	11.8503
788	3	57.047	Block117858	0.455155	-0.216717	0.0464938	12.4106
789	3	57.547	Block118867	0.49622	-0.213135	0.0554206	12.1377
790	3	58.047	Block118895	0.841688	-0.239111	0.0149964	14.7615
791	3	58.547	Block118917	0.73264	-0.213395	-0.0227719	11.7617
792	3	59.047	Block117930	0.892965	-0.217974	-0.034614	12.3426
793	3	59.547	Block118921	0.862364	-0.21869	-0.0365238	12.438
794	3	60.052	Block118869	0.946429	-0.194702	-0.0483538	10.0053
795	3	60.552	Block118970	0.908938	-0.182333	-0.0666271	9.05652
796	3	61.052	Block118930	0.907511	-0.176193	-0.0785848	8.70054
797	3	62.552	Block119132	1.04709	-0.177561	-0.0710242	8.68849
798	3	63.758	Block118969	0.959125	-0.162253	-0.103307	8.03902
799	3	64.258	Block119443	1.03404	-0.173489	-0.0801599	8.48838
800	3	65.258	Block119454	1.09182	-0.181983	-0.0403932	8.69329
801	3	65.963	Block119192	0.815086	-0.164321	-0.0369369	7.09165
802	3	66.963	Block119520	0.791797	-0.15092	-0.0605837	6.27999
803	3	73.398	Block119947	0.718563	-0.115497	-0.126886	5.39171
804	3	73.898	Block120057	0.732726	-0.111372	-0.135588	5.4367
805	3	74.398	Block119793	0.6543	-0.105206	-0.118845	4.5685
806	3	75.398	Block119519	0.842229	-0.106332	-0.13393	5.10221
807	3	75.898	Block119545	0.696312	-0.0989603	-0.114796	4.12664
808	3	76.403	Block119768	0.763697	-0.111889	-0.120958	5.00075
809	3	76.904	Block120211	0.536293	-0.0976465	-0.0983368	3.62635
810	3	77.404	Block120813	0.225555	-0.0790628	-0.06543	2.12328
811	3	77.904	Block120814	0.232471	-0.0857371	-0.0508093	2.19604
812	3	78.904	Block120829	0.267084	-0.0677912	-0.089958	2.17343
813	3	80.404	Block120855	0.237193	-0.0890192	-0.0444259	2.26897
814	3	81.905	Block120861	0.225494	-0.0825762	-0.0578709	2.15383
815	3	82.405	Block120862	0.243774	-0.083285	-0.0557005	2.15369
816	3	83.405	Block121018	0.254533	-0.0845833	-0.0614722	2.29231
817	3	83.91	Block121270	0.398735	-0.0996552	-0.0594559	2.97266
818	3	86.116	Block121020	0.265144	-0.0692308	-0.0652209	1.74782
819	3	86.616	Block121343	0.192163	-0.0670872	-0.0580434	1.56409
820	3	87.616	Block121317	0.268775	-0.0671415	-0.0636019	1.6494
821	3	88.116	Block121323	0.277608	-0.0743178	-0.0764871	2.13137
822	3	88.822	Block121673	0.165567	-0.047669	-0.0621705	1.05774
823	3	89.822	Block121311	0.23367	-0.0417284	-0.0557562	0.828792
824	3	90.527	Block121601	0.37095	-0.0448469	-0.0855051	1.42091
825	3	91.527	Block121828	0.0965066	-0.0250275	-0.0303694	0.273794
826	3	92.027	Block121829	0.0485976	-0.0287429	-0.0224994	0.27329
827	3	92.527	Block122320	0.0695764	-0.0327728	-0.0300693	0.385616
828	3	93.232	Block123241	0.196814	-0.0676757	-0.01471	1.20116
829	3	94.732	Block122308	0.34656	-0.0937506	-0.0352854	2.40283
830	3	95.232	Block122543	0.315651	-0.0826045	-0.0577605	2.15346
831	3	96.233	Block122345	0.321014	-0.0908737	-0.0401435	2.31067
832	3	96.733	Block123145	0.325817	-0.0922173	-0.0384499	2.3577
833	3	97.733	Block123146	0.32957	-0.0825404	-0.0578971	2.15269
834	3	98.233	Block122908	0.361351	-0.0916667	-0.0741326	2.8223
835	3	98.733	Block123037	0.249915	-0.0916144	-0.0776234	2.88509
836	3	99.733	Block123042	0.307322	-0.0932811	-0.0812465	3.0347
837	3	100.233	Block122960	0.303533	-0.0965432	-0.0738025	3.05073
838	3	100.733	Block122877	0.359159	-0.100364	-0.086357	3.49036
839	3	101.233	Block122813	0.481474	-0.114259	-0.112778	4.90073
840	3	101.733	Block122923	0.316379	-0.103711	-0.0853694	3.64385
841	3	102.238	Block122977	0.155801	-0.0913272	-0.0816895	2.95155
842	3	103.238	Block122964	0.0709422	-0.0940983	-0.0590618	2.69148
843	3	104.238	Block102668	0.15896	-0.102475	-0.0866993	3.607
844	3	105.238	Block122939	0.347072	-0.114586	-0.116112	5.0142
845	3	105.744	Block122950	0.347072	-0.114586	-0.116112	5.0142
846	3	106.949	Block102656	0.304812	-0.112461	-0.122122	5.0685
847	3	107.449	Block102659	0.300238	-0.112026	-0.126964	5.19305
848	3	108.449	Block117922	0.496588	-0.12442	-0.175724	7.77123
849	3	108.949	Block118753	0.760954	-0.131836	-0.206312	9.708
850	4	0	Block123293	0.886488	-0.0793556	-0.0604063	2.05735
851	4	1.5	Block123402	1.18091	-0.0899246	-0.0731159	2.72309
852	4	1.5	Block123799	1.18091	-0.0899246	-0.0731159	2.72309
853	4	1.5	Block123798	1.18091	-0.0899246	-0.0731159	2.72309
854	4	3.001	Block123607	1.16352	-0.0908286	-0.071757	2.74059
855	4	4.001	Block123462	1.27352	-0.0792	-0.0938	2.68753
856	4	4.001	Block123399	1.27352	-0.0792	-0.0938	2.68753
857	4	4.001	Block123414	1.27352	-0.0792	-0.0938	2.68753
858	4	4.001	Block123468	1.27352	-0.0792	-0.0938	2.68753
859	4	4.001	Block123405	1.27352	-0.0792	-0.0938	2.68753
860	4	6.002	Block123777	1.27563	-0.087341	-0.0774479	2.68655
861	4	7.002	Block123764	1.21361	-0.084825	-0.082775	2.68145
862	4	7.002	Block123765	1.21361	-0.084825	-0.082775	2.68145
863	4	7.002	Block123802	1.21361	-0.084825	-0.082775	2.68145
864	4	8.002	Block123762	1.50299	-0.0656583	-0.120342	2.89725
865	4	9.503	Block123754	1.55231	-0.0612185	-0.100245	2.20182
866	4	10.003	Block123905	1.52342	-0.0700772	-0.083341	2.11118
867	4	10.503	Block123758	1.27817	-0.0631548	-0.0714349	1.64793
868	4	13.929	Block123919	1.00395	-0.0327053	-0.0569999	0.675908
869	4	14.949	Block123999	1.00395	-0.0327053	-0.0569999	0.675908
870	4	16.871	Block124004	0.499982	0.0160374	-0.0291293	0.17554
871	4	17.871	Block124005	0.278788	0.0227573	-0.0267129	0.226313
872	4	20.473	Block124014	0.738839	-0.01139	-0.0825375	0.888061
873	4	22.474	Block124016	0.249372	0.0275556	-0.0364376	0.367873
874	4	22.974	Block124017	0.231177	0.0253012	-0.0311901	0.291376
875	4	23.474	Block124022	0.158671	0.0174259	-0.0166481	0.114552
876	4	24.975	Block124023	0.0237333	0.043951	-0.0112074	0.515455
877	4	24.975	Block124027	0.0237333	0.043951	-0.0112074	0.515455
878	4	25.475	Block124121	0.090469	0.0515	-0.0251667	0.768935
879	4	26.475	Block124122	0.15236	0.0515608	-0.054982	1.07959
880	4	26.975	Block124126	0.256408	0.0537845	-0.0611155	1.23194
881	4	28.475	Block124127	0.36862	0.0691504	-0.0988545	2.49721
882	4	28.975	Block124128	0.22642	0.0644436	-0.0863329	2.03658
883	4	29.475	Block124129	0.153213	0.0581359	-0.0770599	1.64109
884	4	29.975	Block124131	0.119246	0.06228	-0.0676868	1.59708
885	4	31.476	Block124132	0.176412	0.062298	-0.0987046	2.25825
886	4	32.476	Block124134	0.415818	0.0800556	-0.124387	3.65041
887	4	32.976	Block124135	0.431738	0.0846149	-0.113652	3.51964
888	4	33.976	Block124138	0.481353	0.0684247	-0.151964	4.16943
889	4	36.478	Block124150	0.243353	0.0376875	-0.132249	2.59638
890	4	37.978	Block124156	0.290058	0.049733	-0.126817	2.69645
891	4	37.978	Block124157	0.290058	0.049733	-0.126817	2.69645
892	4	38.478	Block124237	0.282871	0.0647867	-0.0891436	2.11125
893	4	38.478	Block124158	0.282871	0.0647867	-0.0891436	2.11125
894	4	38.979	Block124238	0.284567	0.0613997	-0.0980394	2.2125
895	4	38.979	Block124240	0.284567	0.0613997	-0.0980394	2.2125
896	4	38.979	Block124321	0.284567	0.0613997	-0.0980394	2.2125
897	4	38.979	Block124235	0.284567	0.0613997	-0.0980394	2.2125
898	4	39.979	Block124318	0.184534	0.0485833	-0.0603241	1.08102
899	4	40.479	Block124317	0.191253	0.0417976	-0.0781721	1.23664
900	4	41.184	Block124310	0.133544	0.0402963	-0.0717273	1.08119
901	4	41.684	Block124438	0.136077	0.0392105	-0.0755263	1.12989
902	4	42.684	Block124588	0.187406	0.0430351	-0.0658684	1.03797
903	4	44.184	Block124621	0.174338	0.0683869	0.0141018	1.22401
904	4	46.185	Block124624	0.439433	0.0964352	-0.00341667	2.39666
905	4	46.685	Block124623	0.350104	0.0865784	-0.0288437	2.04656
906	4	47.686	Block124626	0.620805	0.108342	-0.0219526	3.09363
907	4	48.186	Block124627	0.509468	0.100742	-0.0427078	2.86349
908	4	48.686	Block124861	0.524785	0.106027	-0.0278906	3.00611
909	4	48.686	Block124628	0.524785	0.106027	-0.0278906	3.00611
910	4	48.686	Block124633	0.524785	0.106027	-0.0278906	3.00611
911	4	48.686	Block124632	0.524785	0.106027	-0.0278906	3.00611
912	4	48.686	Block124649	0.524785	0.106027	-0.0278906	3.00611
913	4	48.686	Block124631	0.524785	0.106027	-0.0278906	3.00611
914	4	49.686	Block124931	0.580504	0.110188	0.000162435	3.12483
915	4	49.686	Block124629	0.580504	0.110188	0.000162435	3.12483
916	4	49.686	Block124820	0.580504	0.110188	0.000162435	3.12483
917	4	49.686	Block124966	0.580504	0.110188	0.000162435	3.12483
918	4	49.686	Block124965	0.580504	0.110188	0.000162435	3.12483
919	4	49.686	Block124630	0.580504	0.110188	0.000162435	3.12483
920	4	49.686	Block124651	0.580504	0.110188	0.000162435	3.12483
921	4	49.686	Block124961	0.580504	0.110188	0.000162435	3.12483
922	4	49.686	Block124824	0.580504	0.110188	0.000162435	3.12483
923	4	49.686	Block124816	0.580504	0.110188	0.000162435	3.12483
924	4	49.686	Block124865	0.580504	0.110188	0.000162435	3.12483
925	4	49.686	Block124944	0.580504	0.110188	0.000162435	3.12483
926	4	49.686	Block124819	0.580504	0.110188	0.000162435	3.12483
927	4	49.686	Block124949	0.580504	0.110188	0.000162435	3.12483
928	4	49.686	Block125049	0.580504	0.110188	0.000162435	3.12483
929	4	49.686	Block124734	0.580504	0.110188	0.000162435	3.12483
930	4	49.686	Block124959	0.580504	0.110188	0.000162435	3.12483
931	4	49.686	Block124963	0.580504	0.110188	0.000162435	3.12483
932	4	49.686	Block124818	0.580504	0.110188	0.000162435	3.12483
933	4	49.686	Block124770	0.580504	0.110188	0.000162435	3.12483
934	4	49.686	Block124652	0.580504	0.110188	0.000162435	3.12483
935	4	49.686	Block124941	0.580504	0.110188	0.000162435	3.12483
936	4	49.686	Block124948	0.580504	0.110188	0.000162435	3.12483
937	4	49.686	Block124817	0.580504	0.110188	0.000162435	3.12483
938	4	49.686	Block125054	0.580504	0.110188	0.000162435	3.12483
939	4	50.686	Block124831	0.503162	0.111563	-0.00116598	3.20425
940	4	50.686	Block124825	0.503162	0.111563	-0.00116598	3.20425
941	4	51.186	Block124833	0.570961	0.111552	-0.00354227	3.20633
942	4	51.186	Block124857	0.570961	0.111552	-0.00354227	3.20633
943	4	51.186	Block124854	0.570961	0.111552	-0.00354227	3.20633
944	4	51.186	Block124849	0.570961	0.111552	-0.00354227	3.20633
945	4	51.186	Block124847	0.570961	0.111552	-0.00354227	3.20633
946	4	51.186	Block124855	0.570961	0.111552	-0.00354227	3.20633
947	4	51.186	Block124839	0.570961	0.111552	-0.00354227	3.20633
948	4	51.186	Block124851	0.570961	0.111552	-0.00354227	3.20633
949	4	52.186	Block124856	0.695016	0.110139	-0.00241667	3.1242
950	4	53.186	Block124956	0.498185	0.109722	-0.0035	3.10201
951	4	53.186	Block124958	0.498185	0.109722	-0.0035	3.10201
952	4	53.186	Block124952	0.498185	0.109722	-0.0035	3.10201
953	4	54.186	Block125353	0.494261	0.100349	0.016138	2.6166
954	4	54.686	Block124974	0.417311	0.0897807	-0.010779	2.09406
955	4	54.686	Block125066	0.417311	0.0897807	-0.010779	2.09406
956	4	54.686	Block125065	0.417311	0.0897807	-0.010779	2.09406
957	4	54.686	Block125061	0.417311	0.0897807	-0.010779	2.09406
958	4	54.686	Block124973	0.417311	0.0897807	-0.010779	2.09406
959	4	54.686	Block125152	0.417311	0.0897807	-0.010779	2.09406
960	4	54.686	Block124977	0.417311	0.0897807	-0.010779	2.09406
961	4	54.686	Block125151	0.417311	0.0897807	-0.010779	2.09406
962	4	54.686	Block125063	0.417311	0.0897807	-0.010779	2.09406
963	4	54.686	Block124786	0.417311	0.0897807	-0.010779	2.09406
964	4	54.686	Block124784	0.417311	0.0897807	-0.010779	2.09406
965	4	55.186	Block125068	0.206244	0.0717588	0.0223726	1.38052
966	4	55.186	Block125174	0.206244	0.0717588	0.0223726	1.38052
967	4	55.186	Block125071	0.206244	0.0717588	0.0223726	1.38052
968	4	55.186	Block125069	0.206244	0.0717588	0.0223726	1.38052
969	4	55.186	Block125056	0.206244	0.0717588	0.0223726	1.38052
970	4	55.186	Block125171	0.206244	0.0717588	0.0223726	1.38052
971	4	56.186	Block125148	0.291605	0.0891754	-0.0120359	2.07032
972	4	56.686	Block125143	0.577487	0.108114	-0.0456997	3.29628
973	4	56.686	Block125145	0.577487	0.108114	-0.0456997	3.29628
974	4	56.686	Block125146	0.577487	0.108114	-0.0456997	3.29628
975	4	57.186	Block125083	0.587184	0.104381	-0.0554219	3.22032
976	4	58.187	Block125084	0.515284	0.102675	-0.0321308	2.85989
977	4	58.187	Block125112	0.515284	0.102675	-0.0321308	2.85989
978	4	58.687	Block125141	0.540077	0.102688	-0.0396672	2.93262
979	4	59.392	Block125080	0.704387	0.112592	-0.0582981	3.72396
980	4	59.392	Block125079	0.704387	0.112592	-0.0582981	3.72396
981	4	59.392	Block125076	0.704387	0.112592	-0.0582981	3.72396
982	4	59.897	Block125074	0.557365	0.103045	-0.0588887	3.20039
983	4	60.397	Block125073	0.483923	0.0945513	-0.0392582	2.51372
984	4	60.397	Block125072	0.483923	0.0945513	-0.0392582	2.51372
985	4	60.897	Block125150	0.507818	0.0996199	-0.0265171	2.65602
986	4	61.397	Block125629	0.625424	0.104781	-0.0393505	3.04147
987	4	62.397	Block125628	1.01568	0.118084	-0.094244	4.76426
988	4	62.397	Block125626	1.01568	0.118084	-0.094244	4.76426
989	4	62.897	Block125625	0.861909	0.114293	-0.0830426	4.27891
990	4	63.897	Block125659	1.17024	0.127276	-0.115627	5.92855
991	4	64.397	Block125621	1.03449	0.124751	-0.106625	5.50538
992	4	64.397	Block125623	1.03449	0.124751	-0.106625	5.50538
993	4	65.397	Block125657	1.0237	0.126924	-0.101619	5.5127
994	4	65.397	Block125658	1.0237	0.126924	-0.101619	5.5127
995	4	65.397	Block125654	1.0237	0.126924	-0.101619	5.5127
996	4	65.397	Block125656	1.0237	0.126924	-0.101619	5.5127
997	4	65.897	Block125673	0.840343	0.116015	-0.0773882	4.26403
998	4	65.897	Block125655	0.840343	0.116015	-0.0773882	4.26403
999	4	65.897	Block125653	0.840343	0.116015	-0.0773882	4.26403
1000	4	66.897	Block125679	0.662776	0.0964425	-0.0566281	2.82543
1001	4	66.897	Block125664	0.662776	0.0964425	-0.0566281	2.82543
1002	4	66.897	Block125665	0.662776	0.0964425	-0.0566281	2.82543
1003	4	66.897	Block125678	0.662776	0.0964425	-0.0566281	2.82543
1004	4	66.897	Block125671	0.662776	0.0964425	-0.0566281	2.82543
1005	4	66.897	Block125663	0.662776	0.0964425	-0.0566281	2.82543
1006	4	66.897	Block125670	0.662776	0.0964425	-0.0566281	2.82543
1007	4	66.897	Block125676	0.662776	0.0964425	-0.0566281	2.82543
1008	4	66.897	Block125672	0.662776	0.0964425	-0.0566281	2.82543
1009	4	66.897	Block125667	0.662776	0.0964425	-0.0566281	2.82543
1010	4	66.897	Block125669	0.662776	0.0964425	-0.0566281	2.82543
1011	4	67.397	Block125677	0.965781	0.103991	-0.0746512	3.52469
1012	4	67.897	Block125682	1.07151	0.0964425	-0.0566281	2.82543
1013	4	67.897	Block125684	1.07151	0.0964425	-0.0566281	2.82543
1014	4	67.897	Block125675	1.07151	0.0964425	-0.0566281	2.82543
1015	4	67.897	Block125683	1.07151	0.0964425	-0.0566281	2.82543
1016	4	68.397	Block125688	1.31391	0.113496	-0.0833802	4.23914
1017	4	68.397	Block125686	1.31391	0.113496	-0.0833802	4.23914
1018	4	68.397	Block125685	1.31391	0.113496	-0.0833802	4.23914
1019	4	68.397	Block125740	1.31391	0.113496	-0.0833802	4.23914
1020	4	68.397	Block125687	1.31391	0.113496	-0.0833802	4.23914
1021	4	68.397	Block125741	1.31391	0.113496	-0.0833802	4.23914
1022	4	68.898	Block125742	1.30799	0.120204	-0.0663101	4.31293
1023	4	68.898	Block125743	1.30799	0.120204	-0.0663101	4.31293
1024	4	69.398	Block125761	1.5313	0.132618	-0.0833057	5.45671
1025	4	69.398	Block125745	1.5313	0.132618	-0.0833057	5.45671
1026	4	69.398	Block125746	1.5313	0.132618	-0.0833057	5.45671
1027	4	69.398	Block125744	1.5313	0.132618	-0.0833057	5.45671
1028	4	69.898	Block125760	1.53749	0.130579	-0.0895188	5.45717
1029	4	70.398	Block125766	1.53274	0.129851	-0.0921627	5.47037
1030	4	70.898	Block125767	1.5872	0.108819	-0.144611	5.76353
1031	4	70.898	Block125776	1.5872	0.108819	-0.144611	5.76353
1032	4	71.898	Block125781	1.47269	0.110006	-0.116623	4.8937
1033	4	71.898	Block125798	1.47269	0.110006	-0.116623	4.8937
1034	4	71.898	Block125780	1.47269	0.110006	-0.116623	4.8937
1035	4	72.398	Block125777	1.81287	0.120476	-0.138827	6.24955
1036	4	73.398	Block125779	1.17413	0.0796171	-0.0700206	2.27752
1037	4	73.398	Block125799	1.17413	0.0796171	-0.0700206	2.27752
1038	4	73.398	Block125801	1.17413	0.0796171	-0.0700206	2.27752
1039	4	73.898	Block125803	0.930688	0.0736727	-0.057098	1.82901
1040	4	73.898	Block125802	0.930688	0.0736727	-0.057098	1.82901
1041	4	74.898	Block126207	1.10801	0.075318	-0.0841172	2.38393
1042	4	78.002	Block126210	0.780401	0.0649087	-0.0415427	1.3154
1043	4	79.002	Block126327	0.769518	0.0697623	-0.031026	1.38474
1044	4	80.002	Block126325	0.782001	0.0678431	-0.0341552	1.34325
1045	4	80.002	Block126323	0.782001	0.0678431	-0.0341552	1.34325
1046	4	80.002	Block126321	0.782001	0.0678431	-0.0341552	1.34325
1047	4	80.002	Block126322	0.782001	0.0678431	-0.0341552	1.34325
1048	4	80.002	Block126329	0.782001	0.0678431	-0.0341552	1.34325
1049	4	80.002	Block126346	0.782001	0.0678431	-0.0341552	1.34325
1050	4	80.502	Block126347	0.827799	0.0537228	-0.0696447	1.37316
1051	4	81.002	Block126348	0.771778	0.0562215	-0.0633907	1.33805
1052	4	82.002	Block126443	0.87023	0.0802692	0.000250151	1.65824
1053	4	83.003	Block126461	0.844998	0.0692107	-0.0271733	1.33532
1054	4	83.003	Block126415	0.844998	0.0692107	-0.0271733	1.33532
1055	4	83.003	Block126418	0.844998	0.0692107	-0.0271733	1.33532
1056	4	83.003	Block126417	0.844998	0.0692107	-0.0271733	1.33532
1057	4	83.003	Block126421	0.844998	0.0692107	-0.0271733	1.33532
1058	4	84.003	Block126462	0.734764	0.0664254	-0.0081116	1.14661
1059	4	85.003	Block126466	0.848094	0.06697	-0.0434603	1.40699
1060	4	85.503	Block126463	0.722662	0.047424	-0.0947886	1.73444
1061	4	85.503	Block126465	0.722662	0.047424	-0.0947886	1.73444
1062	4	86.003	Block126464	0.748665	0.0446727	-0.100864	1.81922
1063	4	86.003	Block127182	0.748665	0.0446727	-0.100864	1.81922
1064	4	92.947	Block127179	0.185427	0.00641125	-0.036228	0.177283
1065	4	94.948	Block127199	0.200778	-0.011819	-0.0223746	0.0977931
1066	4	96.449	Block127174	0.107551	-0.00782068	0.00367657	0.0175893
1067	4	98.45	Block127198	0.110547	-0.0309375	-0.000831117	0.246304
1068	4	98.45	Block127223	0.110547	-0.0309375	-0.000831117	0.246304
1069	4	98.45	Block127201	0.110547	-0.0309375	-0.000831117	0.246304
1070	4	99.45	Block127226	0.0697347	-0.0316595	0.0320972	0.392956
1071	4	99.955	Block127237	0.0527668	-0.0393686	0.0437059	0.648372
1072	4	100.455	Block127227	0.0314933	-0.041096	0.0483533	0.739431
1073	4	100.455	Block127485	0.0314933	-0.041096	0.0483533	0.739431
1074	4	100.455	Block127228	0.0314933	-0.041096	0.0483533	0.739431
1075	4	100.955	Block127233	0.0326582	-0.0556277	0.0784358	1.59406
1076	4	102.956	Block127484	0.38449	-0.0735	0.0503085	1.72797
1077	4	102.956	Block127413	0.38449	-0.0735	0.0503085	1.72797
1078	4	103.456	Block127351	0.430359	-0.0645614	0.0317142	1.2098
1079	4	104.161	Block127352	0.48453	-0.0710729	0.0188278	1.35144
1080	4	104.161	Block127369	0.48453	-0.0710729	0.0188278	1.35144
1081	4	104.161	Block127495	0.48453	-0.0710729	0.0188278	1.35144
1082	4	104.661	Block127499	0.547954	-0.0778925	0.00428808	1.56555
1083	4	105.161	Block127567	0.543598	-0.0814798	0.0128296	1.73466
1084	4	106.161	Block127555	0.595124	-0.0878776	-0.00200799	1.98723
1085	4	107.161	Block127647	0.599369	-0.0842903	-0.0103737	1.83789
1086	4	108.162	Block127580	0.444025	-0.100957	0.0201819	2.68474
1087	4	108.162	Block127581	0.444025	-0.100957	0.0201819	2.68474
1088	4	108.662	Block127671	0.628026	-0.0943062	0.0101653	2.30681
1089	4	109.162	Block127678	1.00153	-0.100828	-0.0072604	2.61963
1090	4	109.162	Block127930	1.00153	-0.100828	-0.0072604	2.61963
1091	4	109.662	Block127693	0.86695	-0.10596	0.000702508	2.89015
1092	4	110.662	Block127696	1.09057	-0.113343	0.0195697	3.36571
1093	4	111.662	Block127928	1.9582	-0.113203	0.0610823	3.80315
1094	4	113.162	Block127953	0.418277	-0.0982423	0.0472664	2.78888
1095	4	113.662	Block127939	0.635522	-0.0959804	0.0460739	2.66068
1096	4	114.663	Block127940	0.993867	-0.0931774	0.0404026	2.45909
1097	4	116.163	Block127960	0.604406	-0.103662	0.0280051	2.87901
1098	4	116.663	Block127962	0.693886	-0.106618	0.0186149	2.97923
1099	4	117.163	Block127968	0.404782	-0.120467	0.0428376	3.99215
1100	4	117.163	Block127998	0.404782	-0.120467	0.0428376	3.99215
1101	4	117.163	Block128117	0.404782	-0.120467	0.0428376	3.99215
1102	4	117.663	Block127970	0.324857	-0.119809	0.0443744	3.96913
1103	4	118.168	Block128050	0.335512	-0.117492	0.0488498	3.88235
1104	4	118.168	Block128048	0.335512	-0.117492	0.0488498	3.88235
1105	4	118.668	Block127974	0.577937	-0.113359	0.0609303	3.80984
1106	4	120.669	Block128173	0.00785245	-0.156483	0.0625594	6.8445
1107	4	121.169	Block128200	0.153743	-0.160164	0.0561373	7.04441
1108	4	121.669	Block128195	0.191748	-0.147629	0.0376626	5.81582
1109	4	121.669	Block128198	0.191748	-0.147629	0.0376626	5.81582
1110	4	121.669	Block128196	0.191748	-0.147629	0.0376626	5.81582
1111	4	122.669	Block128193	0.0495013	-0.132145	0.0731465	5.21715
1112	4	124.17	Block128160	0.164694	-0.142824	0.0423987	5.50686
1113	4	124.67	Block128247	0.0506743	-0.139595	0.0484805	5.34544
1114	4	125.17	Block128363	0.050979	-0.134343	0.0636939	5.19925
1115	4	125.67	Block128359	0.065896	-0.129929	0.073526	5.07409
1116	4	125.67	Block128448	0.065896	-0.129929	0.073526	5.07409
1117	5	0	Block128878	0.564097	0.00990253	-0.052117	0.370411
1118	5	0.5	Block128877	0.394608	0.0111481	-0.0507251	0.359347
1119	5	1	Block128658	0.364983	-0.00491667	-0.0182337	0.0477157
1120	5	1	Block128572	0.364983	-0.00491667	-0.0182337	0.0477157
1121	5	1	Block128771	0.364983	-0.00491667	-0.0182337	0.0477157
1122	5	1	Block128880	0.364983	-0.00491667	-0.0182337	0.0477157
1123	5	1	Block128653	0.364983	-0.00491667	-0.0182337	0.0477157
1124	5	1	Block128665	0.364983	-0.00491667	-0.0182337	0.0477157
1125	5	1	Block128761	0.364983	-0.00491667	-0.0182337	0.0477157
1126	5	1	Block128876	0.364983	-0.00491667	-0.0182337	0.0477157
1127	5	1	Block128879	0.364983	-0.00491667	-0.0182337	0.0477157
1128	5	1	Block128875	0.364983	-0.00491667	-0.0182337	0.0477157
1129	5	1	Block129237	0.364983	-0.00491667	-0.0182337	0.0477157
1130	5	1	Block128762	0.364983	-0.00491667	-0.0182337	0.0477157
1131	5	1	Block129235	0.364983	-0.00491667	-0.0182337	0.0477157
1132	5	1	Block129153	0.364983	-0.00491667	-0.0182337	0.0477157
1133	5	1	Block128749	0.364983	-0.00491667	-0.0182337	0.0477157
1134	5	1.5	Block128831	0.51915	0.00605159	0.00148492	0.00965932
1135	5	2.5	Block129154	0.612297	0.00567659	0.0181934	0.049535
1136	5	4.501	Block129057	0.860544	0.00068743	0.0514701	0.334114
1137	5	5.001	Block129269	0.970972	-0.00833916	0.0687046	0.616154
1138	5	5.001	Block129400	0.970972	-0.00833916	0.0687046	0.616154
1139	5	5.001	Block129266	0.970972	-0.00833916	0.0687046	0.616154
1140	5	5.501	Block129258	0.873557	-0.00315455	0.0570531	0.414045
1141	5	5.501	Block129415	0.873557	-0.00315455	0.0570531	0.414045
1142	5	6.001	Block129449	0.732731	-0.0112145	0.0427803	0.265598
1143	5	6.001	Block129373	0.732731	-0.0112145	0.0427803	0.265598
1144	5	6.501	Block129474	1.0931	0.00118889	0.0677222	0.578482
1145	5	7.001	Block129430	1.14598	-0.00662393	0.085184	0.929397
1146	5	7.001	Block129447	1.14598	-0.00662393	0.085184	0.929397
1147	5	7.001	Block129482	1.14598	-0.00662393	0.085184	0.929397
1148	5	8.001	Block129481	0.726821	-0.00447115	0.0894456	1.01631
1149	5	9.002	Block129477	0.957325	0.00478681	0.108335	1.48377
1150	5	9.502	Block129693	0.817315	0.00358718	0.107668	1.46368
1151	5	9.502	Block129470	0.817315	0.00358718	0.107668	1.46368
1152	5	10.502	Block129466	1.28965	0.0109378	0.128485	2.10622
1153	5	10.502	Block129583	1.28965	0.0109378	0.128485	2.10622
1154	5	10.502	Block129676	1.28965	0.0109378	0.128485	2.10622
1155	5	13.004	Block129688	1.59436	0.0140741	0.129358	2.15274
1156	5	13.004	Block129675	1.59436	0.0140741	0.129358	2.15274
1157	5	14.004	Block129905	1.15317	0.0113187	0.0966178	1.20508
1158	5	14.504	Block129909	0.911773	0.00317418	0.0801905	0.81248
1159	5	14.504	Block129835	0.911773	0.00317418	0.0801905	0.81248
1160	5	15.504	Block129911	0.719445	-0.00746439	0.0534386	0.37653
1161	5	16.504	Block129914	0.713657	-0.00287037	0.041713	0.222193
1162	5	17.004	Block129927	0.640621	-0.00425926	0.045528	0.267091
1163	5	17.004	Block129910	0.640621	-0.00425926	0.045528	0.267091
1164	5	17.504	Block129944	0.641609	-0.00849537	0.052963	0.374634
1165	5	17.504	Block129968	0.641609	-0.00849537	0.052963	0.374634
1166	5	18.004	Block129926	0.641609	-0.00849537	0.052963	0.374634
1167	5	18.004	Block129923	0.641609	-0.00849537	0.052963	0.374634
1168	5	18.004	Block129977	0.641609	-0.00849537	0.052963	0.374634
1169	5	19.004	Block129981	0.532701	-0.0128667	0.0540261	0.414228
1170	5	19.504	Block129985	0.371376	-0.0160851	0.0475742	0.35587
1171	5	20.505	Block130012	0.553489	-0.00359127	0.0438851	0.247033
1172	5	21.005	Block130029	0.274035	-0.0145525	0.0197531	0.105146
1173	5	21.505	Block130074	0.256702	-0.0254643	0.0402086	0.375891
1174	5	21.505	Block129996	0.256702	-0.0254643	0.0402086	0.375891
1175	5	22.005	Block130014	0.500389	-0.016646	0.0596222	0.524629
1176	5	22.005	Block130016	0.500389	-0.016646	0.0596222	0.524629
1177	5	22.005	Block130013	0.500389	-0.016646	0.0596222	0.524629
1178	5	22.005	Block130018	0.500389	-0.016646	0.0596222	0.524629
1179	5	22.505	Block130073	0.704564	-0.00787171	0.0771889	0.770513
1180	5	23.01	Block130077	0.531376	-0.0515747	0.0827481	1.56944
1181	5	25.011	Block130098	0.747714	-0.0391929	0.0712203	1.04899
1182	5	25.511	Block130099	0.57738	-0.0438213	0.0612512	0.980763
1183	5	26.511	Block130102	0.628097	-0.0579423	0.0750485	1.59607
1184	5	27.511	Block130091	0.725351	-0.0489899	0.0982071	1.85808
1185	5	27.511	Block130233	0.725351	-0.0489899	0.0982071	1.85808
1186	5	27.511	Block130089	0.725351	-0.0489899	0.0982071	1.85808
1187	5	27.511	Block130097	0.725351	-0.0489899	0.0982071	1.85808
1188	5	28.011	Block130101	0.822707	-0.05648	0.117133	2.58442
1189	5	29.011	Block130188	0.538875	-0.0751164	0.069892	2.0944
1190	5	29.511	Block130174	0.61641	-0.0770518	0.0774919	2.31506
1191	5	30.511	Block130194	0.396061	-0.0587184	0.0382062	1.08263
1192	5	30.511	Block130191	0.396061	-0.0587184	0.0382062	1.08263
1193	5	30.511	Block130316	0.396061	-0.0587184	0.0382062	1.08263
1194	5	30.511	Block130193	0.396061	-0.0587184	0.0382062	1.08263
1195	5	30.511	Block130190	0.396061	-0.0587184	0.0382062	1.08263
1196	5	31.011	Block130182	0.324726	-0.0605351	0.0328761	1.08935
1197	5	31.011	Block130176	0.324726	-0.0605351	0.0328761	1.08935
1198	5	31.511	Block130185	0.360102	-0.0583433	0.0382123	1.07131
1199	5	31.511	Block130315	0.360102	-0.0583433	0.0382123	1.07131
1200	5	32.011	Block130359	0.429397	-0.0617905	0.0485548	1.29491
1201	5	32.011	Block130177	0.429397	-0.0617905	0.0485548	1.29491
1202	5	32.511	Block130391	0.304862	-0.0688843	0.0297324	1.34291
1203	5	32.511	Block130338	0.304862	-0.0688843	0.0297324	1.34291
1204	5	34.012	Block130441	0.31386	-0.0886056	0.0480442	2.33289
1205	5	35.012	Block130367	0.212608	-0.0892319	0.0443701	2.31725
1206	5	35.012	Block130432	0.212608	-0.0892319	0.0443701	2.31725
1207	5	35.012	Block130382	0.212608	-0.0892319	0.0443701	2.31725
1208	5	35.012	Block130627	0.212608	-0.0892319	0.0443701	2.31725
1209	5	35.012	Block130386	0.212608	-0.0892319	0.0443701	2.31725
1210	5	35.012	Block130370	0.212608	-0.0892319	0.0443701	2.31725
1211	5	35.012	Block130376	0.212608	-0.0892319	0.0443701	2.31725
1212	5	35.012	Block130365	0.212608	-0.0892319	0.0443701	2.31725
1213	5	35.012	Block130368	0.212608	-0.0892319	0.0443701	2.31725
1214	5	35.012	Block130388	0.212608	-0.0892319	0.0443701	2.31725
1215	5	35.012	Block130380	0.212608	-0.0892319	0.0443701	2.31725
1216	5	36.012	Block130570	0.114723	-0.100171	0.0187266	2.63612
1217	5	36.012	Block130442	0.114723	-0.100171	0.0187266	2.63612
1218	5	36.512	Block130437	0.300889	-0.111061	0.037803	3.37565
1219	5	36.512	Block130802	0.300889	-0.111061	0.037803	3.37565
1220	5	36.512	Block130455	0.300889	-0.111061	0.037803	3.37565
1221	5	38.513	Block130620	0.503974	-0.14598	0.0412288	5.72894
1222	5	38.513	Block130665	0.503974	-0.14598	0.0412288	5.72894
1223	5	38.513	Block130799	0.503974	-0.14598	0.0412288	5.72894
1224	5	38.513	Block130826	0.503974	-0.14598	0.0412288	5.72894
1225	5	38.513	Block130632	0.503974	-0.14598	0.0412288	5.72894
1226	5	39.013	Block130557	0.594719	-0.155281	0.0544634	6.62198
1227	5	39.013	Block130800	0.594719	-0.155281	0.0544634	6.62198
1228	5	39.013	Block130560	0.594719	-0.155281	0.0544634	6.62198
1229	5	39.013	Block130564	0.594719	-0.155281	0.0544634	6.62198
1230	5	39.013	Block130559	0.594719	-0.155281	0.0544634	6.62198
1231	5	39.013	Block130569	0.594719	-0.155281	0.0544634	6.62198
1232	5	39.013	Block130827	0.594719	-0.155281	0.0544634	6.62198
1233	5	39.513	Block130829	0.558382	-0.154158	0.0480821	6.44484
1234	5	39.513	Block130825	0.558382	-0.154158	0.0480821	6.44484
1235	5	40.013	Block131622	0.502922	-0.147897	0.0608783	6.14184
1236	5	40.513	Block131630	0.397782	-0.13165	0.0280955	4.57867
1237	5	41.013	Block131610	0.45531	-0.138453	0.00924582	4.95087
1238	5	42.013	Block131626	0.287306	-0.120539	-0.0463712	3.9832
1239	5	42.013	Block131524	0.287306	-0.120539	-0.0463712	3.9832
1240	5	42.013	Block130910	0.287306	-0.120539	-0.0463712	3.9832
1241	5	42.513	Block131534	0.305778	-0.134048	-0.0188961	4.65728
1242	5	43.013	Block131499	0.301165	-0.135931	-0.0202277	4.79368
1243	5	43.013	Block131523	0.301165	-0.135931	-0.0202277	4.79368
1244	5	43.513	Block131526	0.325496	-0.143535	-0.0353469	5.43512
1245	5	43.513	Block131483	0.325496	-0.143535	-0.0353469	5.43512
1246	5	44.514	Block131539	0.401069	-0.142957	-0.0265681	5.33021
1247	5	44.514	Block131388	0.401069	-0.142957	-0.0265681	5.33021
1248	5	44.514	Block131500	0.401069	-0.142957	-0.0265681	5.33021
1249	5	44.514	Block131543	0.401069	-0.142957	-0.0265681	5.33021
1250	5	45.014	Block131392	0.416613	-0.141767	-0.026346	5.2418
1251	5	45.514	Block131498	0.316272	-0.105457	-0.0948773	3.94833
1252	5	45.514	Block131568	0.316272	-0.105457	-0.0948773	3.94833
1253	5	45.514	Block131606	0.316272	-0.105457	-0.0948773	3.94833
1254	5	46.014	Block131602	0.367088	-0.0926671	-0.120506	3.98669
1255	5	46.514	Block131599	0.314301	-0.0919324	-0.114179	3.76779
1256	5	46.514	Block131584	0.314301	-0.0919324	-0.114179	3.76779
1257	5	46.514	Block131465	0.314301	-0.0919324	-0.114179	3.76779
1258	5	46.514	Block131601	0.314301	-0.0919324	-0.114179	3.76779
1259	5	46.514	Block133282	0.314301	-0.0919324	-0.114179	3.76779
1260	5	47.014	Block133283	0.339961	-0.0910005	-0.116543	3.79218
1261	5	47.514	Block131571	0.345073	-0.0865934	-0.12461	3.83523
1262	5	47.514	Block133278	0.345073	-0.0865934	-0.12461	3.83523
1263	5	47.514	Block133286	0.345073	-0.0865934	-0.12461	3.83523
1264	5	47.514	Block133276	0.345073	-0.0865934	-0.12461	3.83523
1265	5	47.514	Block133285	0.345073	-0.0865934	-0.12461	3.83523
1266	5	47.514	Block133290	0.345073	-0.0865934	-0.12461	3.83523
1267	5	47.514	Block131570	0.345073	-0.0865934	-0.12461	3.83523
1268	5	47.514	Block131861	0.345073	-0.0865934	-0.12461	3.83523
1269	5	47.514	Block131574	0.345073	-0.0865934	-0.12461	3.83523
1270	5	47.514	Block131569	0.345073	-0.0865934	-0.12461	3.83523
1271	5	48.014	Block133289	0.336285	-0.0937541	-0.110975	3.76431
1272	5	48.014	Block131855	0.336285	-0.0937541	-0.110975	3.76431
1273	5	48.014	Block131854	0.336285	-0.0937541	-0.110975	3.76431
1274	5	48.514	Block132166	0.354314	-0.0943909	-0.117191	3.97079
1275	5	49.014	Block134518	0.326272	-0.0978993	-0.110296	3.94789
1276	5	49.014	Block131805	0.326272	-0.0978993	-0.110296	3.94789
1277	5	49.514	Block131903	0.375424	-0.0822604	-0.144848	4.32921
1278	5	49.514	Block137266	0.375424	-0.0822604	-0.144848	4.32921
1279	5	49.514	Block131906	0.375424	-0.0822604	-0.144848	4.32921
1280	5	50.014	Block132091	0.370615	-0.0863502	-0.137098	4.23144
1281	5	50.514	Block132089	0.414347	-0.0826604	-0.143972	4.31434
1282	5	51.014	Block131909	0.305107	-0.113524	-0.0772291	4.02601
1283	5	51.014	Block131908	0.305107	-0.113524	-0.0772291	4.02601
1284	5	51.014	Block131915	0.305107	-0.113524	-0.0772291	4.02601
1285	5	51.014	Block131923	0.305107	-0.113524	-0.0772291	4.02601
1286	5	51.014	Block131916	0.305107	-0.113524	-0.0772291	4.02601
1287	5	51.014	Block131913	0.305107	-0.113524	-0.0772291	4.02601
1288	5	51.014	Block131919	0.305107	-0.113524	-0.0772291	4.02601
1289	5	51.514	Block131853	0.305016	-0.11026	-0.0847301	3.98841
1290	5	51.514	Block132018	0.305016	-0.11026	-0.0847301	3.98841
1291	5	51.514	Block131917	0.305016	-0.11026	-0.0847301	3.98841
1292	5	51.514	Block131910	0.305016	-0.11026	-0.0847301	3.98841
1293	5	52.014	Block131926	0.323789	-0.102135	-0.101331	3.92889
1294	5	52.014	Block131851	0.323789	-0.102135	-0.101331	3.92889
1295	5	52.014	Block131846	0.323789	-0.102135	-0.101331	3.92889
1296	5	52.014	Block131852	0.323789	-0.102135	-0.101331	3.92889
1297	5	52.014	Block131845	0.323789	-0.102135	-0.101331	3.92889
1298	5	52.014	Block131850	0.323789	-0.102135	-0.101331	3.92889
1299	5	52.514	Block132015	0.305259	-0.119318	-0.0662024	4.17803
1300	5	52.514	Block132144	0.305259	-0.119318	-0.0662024	4.17803
1301	5	52.514	Block132157	0.305259	-0.119318	-0.0662024	4.17803
1302	5	52.514	Block132159	0.305259	-0.119318	-0.0662024	4.17803
1303	5	52.514	Block132158	0.305259	-0.119318	-0.0662024	4.17803
1304	5	52.514	Block132149	0.305259	-0.119318	-0.0662024	4.17803
1305	5	53.514	Block131790	0.318858	-0.122721	-0.062003	4.32351
1306	5	53.514	Block131935	0.318858	-0.122721	-0.062003	4.32351
1307	5	53.514	Block132024	0.318858	-0.122721	-0.062003	4.32351
1308	5	53.514	Block132135	0.318858	-0.122721	-0.062003	4.32351
1309	5	53.514	Block131795	0.318858	-0.122721	-0.062003	4.32351
1310	5	53.514	Block131800	0.318858	-0.122721	-0.062003	4.32351
1311	5	53.514	Block132184	0.318858	-0.122721	-0.062003	4.32351
1312	5	53.514	Block132226	0.318858	-0.122721	-0.062003	4.32351
1313	5	53.514	Block131973	0.318858	-0.122721	-0.062003	4.32351
1314	5	53.514	Block137124	0.318858	-0.122721	-0.062003	4.32351
1315	5	53.514	Block132203	0.318858	-0.122721	-0.062003	4.32351
1316	5	53.514	Block131986	0.318858	-0.122721	-0.062003	4.32351
1317	5	53.514	Block132059	0.318858	-0.122721	-0.062003	4.32351
1318	5	53.514	Block131803	0.318858	-0.122721	-0.062003	4.32351
1319	5	53.514	Block131809	0.318858	-0.122721	-0.062003	4.32351
1320	5	53.514	Block131793	0.318858	-0.122721	-0.062003	4.32351
1321	5	53.514	Block132207	0.318858	-0.122721	-0.062003	4.32351
1322	5	53.514	Block132041	0.318858	-0.122721	-0.062003	4.32351
1323	5	53.514	Block132177	0.318858	-0.122721	-0.062003	4.32351
1324	5	53.514	Block132082	0.318858	-0.122721	-0.062003	4.32351
1325	5	53.514	Block132175	0.318858	-0.122721	-0.062003	4.32351
1326	5	53.514	Block132171	0.318858	-0.122721	-0.062003	4.32351
1327	5	53.514	Block131979	0.318858	-0.122721	-0.062003	4.32351
1328	5	53.514	Block132211	0.318858	-0.122721	-0.062003	4.32351
1329	5	53.514	Block134614	0.318858	-0.122721	-0.062003	4.32351
1330	5	53.514	Block131940	0.318858	-0.122721	-0.062003	4.32351
1331	5	53.514	Block131974	0.318858	-0.122721	-0.062003	4.32351
1332	5	53.514	Block132205	0.318858	-0.122721	-0.062003	4.32351
1333	5	53.514	Block131798	0.318858	-0.122721	-0.062003	4.32351
1334	5	53.514	Block132176	0.318858	-0.122721	-0.062003	4.32351
1335	5	53.514	Block131865	0.318858	-0.122721	-0.062003	4.32351
1336	5	54.014	Block131783	0.300352	-0.117006	-0.0520111	3.83472
1337	5	54.014	Block132223	0.300352	-0.117006	-0.0520111	3.83472
1338	5	54.014	Block132215	0.300352	-0.117006	-0.0520111	3.83472
1339	5	54.014	Block131987	0.300352	-0.117006	-0.0520111	3.83472
1340	5	54.014	Block132218	0.300352	-0.117006	-0.0520111	3.83472
1341	5	54.014	Block132216	0.300352	-0.117006	-0.0520111	3.83472
1342	5	54.014	Block132212	0.300352	-0.117006	-0.0520111	3.83472
1343	5	54.014	Block132221	0.300352	-0.117006	-0.0520111	3.83472
1344	5	54.014	Block132213	0.300352	-0.117006	-0.0520111	3.83472
1345	5	54.014	Block132219	0.300352	-0.117006	-0.0520111	3.83472
1346	5	54.014	Block132229	0.300352	-0.117006	-0.0520111	3.83472
1347	5	54.014	Block132217	0.300352	-0.117006	-0.0520111	3.83472
1348	5	54.014	Block132189	0.300352	-0.117006	-0.0520111	3.83472
1349	5	54.014	Block131807	0.300352	-0.117006	-0.0520111	3.83472
1350	5	54.014	Block132192	0.300352	-0.117006	-0.0520111	3.83472
1351	5	55.014	Block131989	0.306664	-0.112836	-0.0802032	4.04358
1352	5	55.014	Block133303	0.306664	-0.112836	-0.0802032	4.04358
1353	5	55.514	Block131997	0.305517	-0.119101	-0.0666471	4.17195
1354	5	55.514	Block133300	0.305517	-0.119101	-0.0666471	4.17195
1355	5	55.514	Block131895	0.305517	-0.119101	-0.0666471	4.17195
1356	5	55.514	Block131893	0.305517	-0.119101	-0.0666471	4.17195
1357	5	55.514	Block131885	0.305517	-0.119101	-0.0666471	4.17195
1358	5	55.514	Block131880	0.305517	-0.119101	-0.0666471	4.17195
1359	5	55.514	Block131881	0.305517	-0.119101	-0.0666471	4.17195
1360	5	55.514	Block133301	0.305517	-0.119101	-0.0666471	4.17195
1361	5	55.514	Block131877	0.305517	-0.119101	-0.0666471	4.17195
1362	5	56.514	Block131838	0.306249	-0.11613	-0.0727242	4.0964
1363	5	56.514	Block131831	0.306249	-0.11613	-0.0727242	4.0964
1364	5	56.514	Block131889	0.306249	-0.11613	-0.0727242	4.0964
1365	5	56.514	Block131837	0.306249	-0.11613	-0.0727242	4.0964
1366	5	56.514	Block131869	0.306249	-0.11613	-0.0727242	4.0964
1367	5	56.514	Block131825	0.306249	-0.11613	-0.0727242	4.0964
1368	5	57.014	Block131830	0.328335	-0.107344	-0.0903089	3.9465
1369	5	57.014	Block131826	0.328335	-0.107344	-0.0903089	3.9465
1370	5	57.014	Block131828	0.328335	-0.107344	-0.0903089	3.9465
1371	5	57.514	Block131834	0.311339	-0.110194	-0.0836604	3.96252
1372	5	57.514	Block131822	0.311339	-0.110194	-0.0836604	3.96252
1373	5	58.014	Block131823	0.30991	-0.118733	-0.0662068	4.14241
1374	5	58.014	Block131820	0.30991	-0.118733	-0.0662068	4.14241
1375	5	58.514	Block131816	0.309415	-0.115695	-0.0736135	4.08652
1376	5	58.514	Block131821	0.309415	-0.115695	-0.0736135	4.08652
1377	5	58.514	Block134599	0.309415	-0.115695	-0.0736135	4.08652
1378	5	58.514	Block134586	0.309415	-0.115695	-0.0736135	4.08652
1379	5	58.514	Block134747	0.309415	-0.115695	-0.0736135	4.08652
1380	5	59.014	Block134838	0.342063	-0.12526	-0.0556308	4.39422
1381	5	59.014	Block135717	0.342063	-0.12526	-0.0556308	4.39422
1382	5	59.014	Block132130	0.342063	-0.12526	-0.0556308	4.39422
1383	5	59.014	Block134513	0.342063	-0.12526	-0.0556308	4.39422
1384	5	59.014	Block131900	0.342063	-0.12526	-0.0556308	4.39422
1385	5	59.014	Block131565	0.342063	-0.12526	-0.0556308	4.39422
1386	5	59.014	Block137243	0.342063	-0.12526	-0.0556308	4.39422
1387	5	59.014	Block137131	0.342063	-0.12526	-0.0556308	4.39422
1388	5	59.014	Block132020	0.342063	-0.12526	-0.0556308	4.39422
1389	5	59.014	Block135223	0.342063	-0.12526	-0.0556308	4.39422
1390	5	59.014	Block133517	0.342063	-0.12526	-0.0556308	4.39422
1391	5	59.014	Block134511	0.342063	-0.12526	-0.0556308	4.39422
1392	5	59.014	Block137180	0.342063	-0.12526	-0.0556308	4.39422
1393	5	59.014	Block134584	0.342063	-0.12526	-0.0556308	4.39422
1394	5	59.014	Block133275	0.342063	-0.12526	-0.0556308	4.39422
1395	5	59.014	Block133518	0.342063	-0.12526	-0.0556308	4.39422
1396	5	59.014	Block131898	0.342063	-0.12526	-0.0556308	4.39422
1397	5	59.014	Block135027	0.342063	-0.12526	-0.0556308	4.39422
1398	5	59.014	Block131559	0.342063	-0.12526	-0.0556308	4.39422
1399	5	59.014	Block137269	0.342063	-0.12526	-0.0556308	4.39422
1400	5	59.014	Block133520	0.342063	-0.12526	-0.0556308	4.39422
1401	5	59.014	Block133562	0.342063	-0.12526	-0.0556308	4.39422
1402	5	59.014	Block132537	0.342063	-0.12526	-0.0556308	4.39422
1403	5	59.014	Block135576	0.342063	-0.12526	-0.0556308	4.39422
1404	5	59.014	Block131960	0.342063	-0.12526	-0.0556308	4.39422
1405	5	59.014	Block135573	0.342063	-0.12526	-0.0556308	4.39422
1406	5	59.514	Block132030	0.331946	-0.0912024	-0.123712	4.01557
1407	5	59.514	Block137176	0.331946	-0.0912024	-0.123712	4.01557
1408	5	59.514	Block137236	0.331946	-0.0912024	-0.123712	4.01557
1409	5	59.514	Block132033	0.331946	-0.0912024	-0.123712	4.01557
1410	5	59.514	Block133307	0.331946	-0.0912024	-0.123712	4.01557
1411	5	59.514	Block133306	0.331946	-0.0912024	-0.123712	4.01557
1412	5	59.514	Block131789	0.331946	-0.0912024	-0.123712	4.01557
1413	5	59.514	Block137185	0.331946	-0.0912024	-0.123712	4.01557
1414	5	60.014	Block132113	0.39217	-0.0838715	-0.139983	4.22417
1415	5	60.014	Block137372	0.39217	-0.0838715	-0.139983	4.22417
1416	5	60.014	Block137376	0.39217	-0.0838715	-0.139983	4.22417
1417	5	61.015	Block137350	0.471698	-0.0759014	-0.160798	4.68388
1418	5	61.015	Block137347	0.471698	-0.0759014	-0.160798	4.68388
1419	5	61.015	Block137358	0.471698	-0.0759014	-0.160798	4.68388
1420	5	61.015	Block137357	0.471698	-0.0759014	-0.160798	4.68388
1421	5	61.015	Block137352	0.471698	-0.0759014	-0.160798	4.68388
1422	5	61.015	Block137354	0.471698	-0.0759014	-0.160798	4.68388
1423	5	61.515	Block137353	0.383851	-0.0823271	-0.144702	4.32671
1424	5	61.515	Block131806	0.383851	-0.0823271	-0.144702	4.32671
1425	5	62.015	Block132114	0.330814	-0.0979688	-0.110149	3.94734
1426	5	63.015	Block132069	0.363716	-0.0872301	-0.130846	4.06157
1427	5	63.015	Block132052	0.363716	-0.0872301	-0.130846	4.06157
1428	5	63.515	Block132066	0.325236	-0.0925068	-0.121044	3.9953
1429	5	63.515	Block132064	0.325236	-0.0925068	-0.121044	3.9953
1430	5	63.515	Block132061	0.325236	-0.0925068	-0.121044	3.9953
1431	5	63.515	Block132062	0.325236	-0.0925068	-0.121044	3.9953
1432	5	64.015	Block137276	0.39171	-0.0847049	-0.138219	4.1986
1433	5	64.015	Block137301	0.39171	-0.0847049	-0.138219	4.1986
1434	5	64.015	Block132068	0.39171	-0.0847049	-0.138219	4.1986
1435	5	64.015	Block137210	0.39171	-0.0847049	-0.138219	4.1986
1436	5	64.015	Block132055	0.39171	-0.0847049	-0.138219	4.1986
1437	5	65.015	Block137315	0.250417	-0.0912108	-0.132873	4.30831
1438	5	65.015	Block137286	0.250417	-0.0912108	-0.132873	4.30831
1439	5	65.015	Block137253	0.250417	-0.0912108	-0.132873	4.30831
1440	5	65.515	Block137287	0.294734	-0.0862052	-0.142392	4.4095
1441	5	65.515	Block137227	0.294734	-0.0862052	-0.142392	4.4095
1442	5	65.515	Block137335	0.294734	-0.0862052	-0.142392	4.4095
1443	5	65.515	Block137225	0.294734	-0.0862052	-0.142392	4.4095
1444	5	65.515	Block137196	0.294734	-0.0862052	-0.142392	4.4095
1445	5	65.515	Block137289	0.294734	-0.0862052	-0.142392	4.4095
1446	5	65.515	Block137254	0.294734	-0.0862052	-0.142392	4.4095
1447	5	66.015	Block137195	0.365987	-0.0790774	-0.159115	4.74076
1448	5	66.015	Block137297	0.365987	-0.0790774	-0.159115	4.74076
1449	5	66.015	Block137308	0.365987	-0.0790774	-0.159115	4.74076
1450	5	67.015	Block137322	0.234444	-0.0939528	-0.125476	4.19958
1451	5	67.015	Block137223	0.234444	-0.0939528	-0.125476	4.19958
1452	5	68.015	Block137330	0.332119	-0.0923441	-0.130422	4.28082
1453	5	68.015	Block137712	0.332119	-0.0923441	-0.130422	4.28082
1454	5	68.015	Block137373	0.332119	-0.0923441	-0.130422	4.28082
1455	5	68.015	Block137674	0.332119	-0.0923441	-0.130422	4.28082
1456	5	68.015	Block137327	0.332119	-0.0923441	-0.130422	4.28082
1457	5	68.015	Block137323	0.332119	-0.0923441	-0.130422	4.28082
1458	5	68.515	Block137713	0.218076	-0.0920417	-0.134962	4.4166
1459	5	69.015	Block137709	0.131494	-0.0853011	-0.113224	3.44204
1460	5	69.015	Block137717	0.131494	-0.0853011	-0.113224	3.44204
1461	5	71.016	Block137718	0.0350097	-0.0768194	-0.0784398	2.26516
1462	5	71.516	Block137714	0.0245265	-0.07457	-0.0829034	2.26758
1463	5	72.021	Block137720	0.0634092	-0.0657674	-0.0815842	1.9263
1464	5	73.522	Block137729	0.0259416	-0.116354	-0.0493263	3.76299
1465	5	74.522	Block137732	0.0740709	-0.105763	-0.0247633	2.94338
1466	5	75.522	Block137721	0.065622	-0.105628	-0.0302309	2.97111
1467	5	75.522	Block137728	0.065622	-0.105628	-0.0302309	2.97111
1468	5	75.522	Block138693	0.065622	-0.105628	-0.0302309	2.97111
1469	5	76.522	Block138769	0.0173177	-0.120064	-0.0579296	4.0991
1470	5	77.022	Block137735	0.045143	-0.132421	-0.0820238	5.30812
1471	5	77.522	Block138629	0.0691019	-0.138273	-0.0904273	5.89054
1472	5	77.522	Block137739	0.0691019	-0.138273	-0.0904273	5.89054
1473	5	77.522	Block138766	0.0691019	-0.138273	-0.0904273	5.89054
1474	5	78.022	Block137741	0.243047	-0.144841	-0.0997778	6.58385
1475	5	78.522	Block137738	0.248219	-0.151537	-0.0861503	6.7819
1476	5	78.522	Block137737	0.248219	-0.151537	-0.0861503	6.7819
1477	5	78.522	Block137752	0.248219	-0.151537	-0.0861503	6.7819
1478	5	78.522	Block137736	0.248219	-0.151537	-0.0861503	6.7819
1479	5	79.022	Block137763	0.341362	-0.158221	-0.0952999	7.51421
1480	5	79.522	Block137793	0.382664	-0.163304	-0.100595	8.05902
1481	5	81.023	Block137764	0.198213	-0.160017	-0.0879488	7.49634
1482	5	81.023	Block137845	0.198213	-0.160017	-0.0879488	7.49634
1483	5	81.023	Block137792	0.198213	-0.160017	-0.0879488	7.49634
1484	5	82.023	Block137841	0.281157	-0.156258	-0.0884219	7.20214
1485	5	82.023	Block137838	0.281157	-0.156258	-0.0884219	7.20214
1486	5	82.023	Block137842	0.281157	-0.156258	-0.0884219	7.20214
1487	5	82.023	Block138025	0.281157	-0.156258	-0.0884219	7.20214
1488	5	82.523	Block137899	0.0949734	-0.150379	-0.0811168	6.58998
1489	5	83.023	Block138033	0.193988	-0.140264	-0.0987486	6.22515
1490	5	83.523	Block138036	0.236468	-0.1404	-0.103919	6.36356
1491	5	84.023	Block138042	0.279054	-0.140437	-0.104583	6.38313
1492	5	84.523	Block138043	0.204806	-0.148734	-0.088103	6.60795
1493	5	86.524	Block138038	0.16779	-0.122617	-0.0260687	3.93955
1494	5	86.524	Block138037	0.16779	-0.122617	-0.0260687	3.93955
1495	5	87.024	Block138047	0.0892138	-0.133129	-0.00892247	4.56576
1496	5	87.524	Block138048	0.0548338	-0.140203	-0.0199905	5.09581
1497	5	88.024	Block138053	0.107153	-0.136661	-0.0242189	4.86445
1498	5	90.025	Block138065	0.0452142	-0.157943	0.00180468	6.42239
1499	5	90.525	Block138056	0.0754998	-0.160569	-0.00690142	6.63636
1500	5	90.525	Block138068	0.0754998	-0.160569	-0.00690142	6.63636
1501	5	91.025	Block138059	0.0303719	-0.176047	0.0191231	8.03955
1502	5	91.025	Block138074	0.0303719	-0.176047	0.0191231	8.03955
1503	5	91.025	Block138064	0.0303719	-0.176047	0.0191231	8.03955
1504	5	91.525	Block138089	0.0303719	-0.176047	0.0191231	8.03955
1505	5	92.025	Block138104	0.0370318	-0.183871	0.0295648	8.83876
1506	5	92.025	Block138069	0.0370318	-0.183871	0.0295648	8.83876
1507	5	93.526	Block138106	0.219622	-0.173234	0.00502937	7.73144
1508	5	95.527	Block138107	0.161826	-0.178922	0.0118385	8.26767
1509	5	97.027	Block138108	2.86719	-0.189422	0.0500842	9.59828
1510	5	98.528	Block138113	0.208282	-0.181826	0.0306046	8.65476
1511	5	99.528	Block138231	0.495875	-0.167233	0.00709576	7.21031
1512	5	99.528	Block138112	0.495875	-0.167233	0.00709576	7.21031
1513	5	100.028	Block138179	0.281175	-0.167416	0.011579	7.24033
1514	5	100.528	Block138901	0.488441	-0.170302	0.00113506	7.46578
1515	5	100.528	Block138111	0.488441	-0.170302	0.00113506	7.46578
1516	5	101.528	Block138224	0.258262	-0.175046	0.00390993	7.8917
1517	5	101.528	Block138222	0.258262	-0.175046	0.00390993	7.8917
1518	5	101.528	Block138214	0.258262	-0.175046	0.00390993	7.8917
1519	5	101.528	Block138865	0.258262	-0.175046	0.00390993	7.8917
1520	5	101.528	Block138227	0.258262	-0.175046	0.00390993	7.8917
1521	5	102.028	Block139396	0.110191	-0.167733	0.0171076	7.29229
1522	5	102.028	Block139392	0.110191	-0.167733	0.0171076	7.29229
1523	5	102.028	Block138930	0.110191	-0.167733	0.0171076	7.29229
1524	5	102.528	Block139382	0.217826	-0.157092	-0.0033217	6.35033
1525	5	102.528	Block139599	0.217826	-0.157092	-0.0033217	6.35033
1526	5	102.528	Block139150	0.217826	-0.157092	-0.0033217	6.35033
1527	5	102.528	Block139184	0.217826	-0.157092	-0.0033217	6.35033
1528	6	0	Block139648	0.924667	0.0199603	0.147998	2.85084
1529	6	0	Block139647	0.924667	0.0199603	0.147998	2.85084
1530	6	0.5	Block139642	0.848578	0.0259989	0.137425	2.53854
1531	6	1.501	Block139619	1.04484	0.0163437	0.158509	3.22521
1532	6	2.006	Block139618	1.01908	0.00834272	0.158429	3.17748
1533	6	3.006	Block139615	1.31971	-0.0030018	0.18866	4.49479
1534	6	3.506	Block139612	1.15176	-0.0107015	0.177459	4.01124
1535	6	3.506	Block139613	1.15176	-0.0107015	0.177459	4.01124
1536	6	4.506	Block139607	0.986349	-0.0223302	0.150471	3.00098
1537	6	5.006	Block140043	0.893851	-0.0280247	0.1426	2.78693
1538	6	6.506	Block140039	0.998203	-0.0550214	0.193312	5.54558
1539	6	8.007	Block140036	0.867353	-0.0100476	0.142002	2.5766
1540	6	8.507	Block140025	0.955143	-0.00502857	0.148724	2.80028
1541	6	10.007	Block140026	1.26396	0.00703571	0.172484	3.75949
1542	6	10.007	Block140024	1.26396	0.00703571	0.172484	3.75949
1543	6	10.712	Block140019	1.20038	-0.0229584	0.176441	4.08263
1544	6	11.712	Block140008	1.11046	-0.0258395	0.185865	4.55322
1545	6	11.712	Block139938	1.11046	-0.0258395	0.185865	4.55322
1546	6	12.212	Block140015	0.855381	-0.050776	0.14353	3.29824
1547	6	13.713	Block139976	0.734158	-0.0492224	0.145501	3.32946
1548	6	13.713	Block140102	0.734158	-0.0492224	0.145501	3.32946
1549	6	14.218	Block139981	0.807276	-0.0481445	0.145214	3.29108
1550	6	14.718	Block139989	0.876795	-0.0482343	0.145454	3.30222
1551	6	14.718	Block139999	0.876795	-0.0482343	0.145454	3.30222
1552	6	14.718	Block139996	0.876795	-0.0482343	0.145454	3.30222
1553	6	14.718	Block139946	0.876795	-0.0482343	0.145454	3.30222
1554	6	14.718	Block139931	0.876795	-0.0482343	0.145454	3.30222
1555	6	14.718	Block139998	0.876795	-0.0482343	0.145454	3.30222
1556	6	14.718	Block139932	0.876795	-0.0482343	0.145454	3.30222
1557	6	14.718	Block139944	0.876795	-0.0482343	0.145454	3.30222
1558	6	14.718	Block139942	0.876795	-0.0482343	0.145454	3.30222
1559	6	14.718	Block139993	0.876795	-0.0482343	0.145454	3.30222
1560	6	15.218	Block139960	0.413991	-0.0803818	0.0856746	2.62293
1561	6	15.218	Block139970	0.413991	-0.0803818	0.0856746	2.62293
1562	6	16.218	Block139974	0.899653	-0.0435702	0.156353	3.60595
1563	6	16.718	Block140117	0.698544	-0.0436004	0.158595	3.6962
1564	6	16.718	Block140138	0.698544	-0.0436004	0.158595	3.6962
1565	6	17.718	Block139853	0.315363	-0.0516406	0.111868	2.29351
1566	6	19.719	Block139852	0.497875	-0.0477564	0.12743	2.6654
1567	6	20.219	Block139841	0.497079	-0.0426	0.113946	2.12886
1568	6	21.72	Block139863	0.773883	-0.0704545	0.155545	4.38368
1569	6	22.72	Block139868	1.29055	-0.0941667	0.198227	7.33116
1570	6	22.72	Block139866	1.29055	-0.0941667	0.198227	7.33116
1571	6	22.72	Block139869	1.29055	-0.0941667	0.198227	7.33116
1572	6	22.72	Block139864	1.29055	-0.0941667	0.198227	7.33116
1573	6	23.22	Block139861	1.36133	-0.101703	0.186198	7.12912
1574	6	23.22	Block139859	1.36133	-0.101703	0.186198	7.12912
1575	6	24.22	Block149343	1.16875	-0.0998279	0.165373	6.0963
1576	6	24.72	Block139862	1.02381	-0.0940341	0.149765	5.17479
1577	6	27.824	Block149348	1.45947	-0.11291	0.168602	6.96113
1578	6	27.824	Block149347	1.45947	-0.11291	0.168602	6.96113
1579	6	28.824	Block149378	1.15456	-0.0927778	0.159853	5.51206
1580	6	28.824	Block149379	1.15456	-0.0927778	0.159853	5.51206
1581	6	29.824	Block149376	0.874952	-0.0786432	0.14103	4.15554
1582	6	30.324	Block149363	0.62158	-0.107515	0.0833821	3.89652
1583	6	31.325	Block149364	0.876531	-0.12165	0.10345	5.22106
1584	6	31.83	Block149257	1.06591	-0.15381	0.110384	7.70989
1585	6	34.432	Block149249	0.509396	-0.116896	0.039848	3.7403
1586	6	35.932	Block140165	0.49863	-0.103452	0.0161877	2.7959
1587	6	37.433	Block140213	0.540755	-0.133195	-0.0401932	4.74344
1588	6	38.433	Block140178	0.310263	-0.106958	-0.0738341	3.59302
1589	6	40.434	Block158820	0.255321	-0.0899471	-0.097999	3.25014
1590	6	40.434	Block153139	0.255321	-0.0899471	-0.097999	3.25014
1591	6	40.434	Block142335	0.255321	-0.0899471	-0.097999	3.25014
1592	6	40.434	Block142198	0.255321	-0.0899471	-0.097999	3.25014
1593	6	40.434	Block153125	0.255321	-0.0899471	-0.097999	3.25014
1594	6	40.434	Block153127	0.255321	-0.0899471	-0.097999	3.25014
1595	6	40.434	Block153126	0.255321	-0.0899471	-0.097999	3.25014
1596	6	40.434	Block141075	0.255321	-0.0899471	-0.097999	3.25014
1597	6	40.434	Block141076	0.255321	-0.0899471	-0.097999	3.25014
1598	6	40.434	Block158651	0.255321	-0.0899471	-0.097999	3.25014
1599	6	40.934	Block141074	0.189287	-0.0645696	-0.0391199	1.25362
1600	6	40.934	Block140244	0.189287	-0.0645696	-0.0391199	1.25362
1601	6	40.934	Block145617	0.189287	-0.0645696	-0.0391199	1.25362
1602	6	41.434	Block146349	0.187545	-0.0698286	-0.047841	1.52716
1603	6	41.434	Block158687	0.187545	-0.0698286	-0.047841	1.52716
1604	6	41.434	Block146369	0.187545	-0.0698286	-0.047841	1.52716
1605	6	41.434	Block156059	0.187545	-0.0698286	-0.047841	1.52716
1606	6	41.434	Block153142	0.187545	-0.0698286	-0.047841	1.52716
1607	6	41.434	Block141077	0.187545	-0.0698286	-0.047841	1.52716
1608	6	41.434	Block146364	0.187545	-0.0698286	-0.047841	1.52716
1609	6	41.434	Block153176	0.187545	-0.0698286	-0.047841	1.52716
1610	6	41.434	Block146350	0.187545	-0.0698286	-0.047841	1.52716
1611	6	41.434	Block146361	0.187545	-0.0698286	-0.047841	1.52716
1612	6	41.434	Block155950	0.187545	-0.0698286	-0.047841	1.52716
1613	6	41.434	Block146375	0.187545	-0.0698286	-0.047841	1.52716
1614	6	41.434	Block146379	0.187545	-0.0698286	-0.047841	1.52716
1615	6	41.434	Block158699	0.187545	-0.0698286	-0.047841	1.52716
1616	6	41.434	Block158868	0.187545	-0.0698286	-0.047841	1.52716
1617	6	41.434	Block146383	0.187545	-0.0698286	-0.047841	1.52716
1618	6	41.434	Block146327	0.187545	-0.0698286	-0.047841	1.52716
1619	6	41.434	Block146354	0.187545	-0.0698286	-0.047841	1.52716
1620	6	41.434	Block146370	0.187545	-0.0698286	-0.047841	1.52716
1621	6	41.434	Block146378	0.187545	-0.0698286	-0.047841	1.52716
1622	6	41.434	Block146118	0.187545	-0.0698286	-0.047841	1.52716
1623	6	41.434	Block158688	0.187545	-0.0698286	-0.047841	1.52716
1624	6	41.434	Block142033	0.187545	-0.0698286	-0.047841	1.52716
1625	6	41.434	Block146356	0.187545	-0.0698286	-0.047841	1.52716
1626	6	41.434	Block158702	0.187545	-0.0698286	-0.047841	1.52716
1627	6	41.434	Block146351	0.187545	-0.0698286	-0.047841	1.52716
1628	6	41.434	Block140249	0.187545	-0.0698286	-0.047841	1.52716
1629	6	41.434	Block146355	0.187545	-0.0698286	-0.047841	1.52716
1630	6	41.434	Block153162	0.187545	-0.0698286	-0.047841	1.52716
1631	6	41.434	Block145502	0.187545	-0.0698286	-0.047841	1.52716
1632	6	41.434	Block146368	0.187545	-0.0698286	-0.047841	1.52716
1633	6	41.434	Block153163	0.187545	-0.0698286	-0.047841	1.52716
1634	6	41.434	Block158685	0.187545	-0.0698286	-0.047841	1.52716
1635	6	41.434	Block153124	0.187545	-0.0698286	-0.047841	1.52716
1636	6	41.434	Block146352	0.187545	-0.0698286	-0.047841	1.52716
1637	6	41.434	Block158698	0.187545	-0.0698286	-0.047841	1.52716
1638	6	41.434	Block156057	0.187545	-0.0698286	-0.047841	1.52716
1639	6	41.434	Block146381	0.187545	-0.0698286	-0.047841	1.52716
1640	6	41.434	Block146382	0.187545	-0.0698286	-0.047841	1.52716
1641	6	41.434	Block146177	0.187545	-0.0698286	-0.047841	1.52716
1642	6	41.434	Block146377	0.187545	-0.0698286	-0.047841	1.52716
1643	6	41.434	Block158930	0.187545	-0.0698286	-0.047841	1.52716
1644	6	41.434	Block146353	0.187545	-0.0698286	-0.047841	1.52716
1645	6	41.434	Block158695	0.187545	-0.0698286	-0.047841	1.52716
1646	6	41.434	Block140252	0.187545	-0.0698286	-0.047841	1.52716
1647	6	41.434	Block146367	0.187545	-0.0698286	-0.047841	1.52716
1648	6	41.434	Block148980	0.187545	-0.0698286	-0.047841	1.52716
1649	6	41.434	Block146376	0.187545	-0.0698286	-0.047841	1.52716
1650	6	41.434	Block158691	0.187545	-0.0698286	-0.047841	1.52716
1651	6	41.434	Block158677	0.187545	-0.0698286	-0.047841	1.52716
1652	6	41.434	Block146365	0.187545	-0.0698286	-0.047841	1.52716
1653	6	41.434	Block145720	0.187545	-0.0698286	-0.047841	1.52716
1654	6	41.434	Block158689	0.187545	-0.0698286	-0.047841	1.52716
1655	6	41.434	Block153164	0.187545	-0.0698286	-0.047841	1.52716
1656	6	41.434	Block156060	0.187545	-0.0698286	-0.047841	1.52716
1657	6	41.434	Block146363	0.187545	-0.0698286	-0.047841	1.52716
1658	6	41.434	Block141078	0.187545	-0.0698286	-0.047841	1.52716
1659	6	41.434	Block153123	0.187545	-0.0698286	-0.047841	1.52716
1660	6	41.434	Block146384	0.187545	-0.0698286	-0.047841	1.52716
1661	6	41.434	Block158867	0.187545	-0.0698286	-0.047841	1.52716
1662	6	42.434	Block145588	0.407418	-0.10649	-0.134845	5.14132
1663	6	43.434	Block148945	0.38786	-0.0993298	-0.118897	4.26416
1664	6	43.434	Block153191	0.38786	-0.0993298	-0.118897	4.26416
1665	6	43.434	Block148954	0.38786	-0.0993298	-0.118897	4.26416
1666	6	43.434	Block148915	0.38786	-0.0993298	-0.118897	4.26416
1667	6	43.434	Block142612	0.38786	-0.0993298	-0.118897	4.26416
1668	6	43.434	Block148594	0.38786	-0.0993298	-0.118897	4.26416
1669	6	43.434	Block142299	0.38786	-0.0993298	-0.118897	4.26416
1670	6	43.434	Block148536	0.38786	-0.0993298	-0.118897	4.26416
1671	6	43.434	Block153190	0.38786	-0.0993298	-0.118897	4.26416
1672	6	44.435	Block164206	0.287836	-0.0976631	-0.115185	4.07282
1673	6	44.435	Block140472	0.287836	-0.0976631	-0.115185	4.07282
1674	6	44.435	Block145801	0.287836	-0.0976631	-0.115185	4.07282
1675	6	44.435	Block158636	0.287836	-0.0976631	-0.115185	4.07282
1676	6	45.435	Block142046	0.304585	-0.0893298	-0.0966242	3.18881
1677	6	45.435	Block142036	0.304585	-0.0893298	-0.0966242	3.18881
1678	6	45.435	Block142045	0.304585	-0.0893298	-0.0966242	3.18881
1679	6	46.435	Block142097	0.345478	-0.10254	-0.126046	4.64631
1680	6	46.435	Block164187	0.345478	-0.10254	-0.126046	4.64631
1681	6	46.435	Block142039	0.345478	-0.10254	-0.126046	4.64631
1682	6	46.435	Block158773	0.345478	-0.10254	-0.126046	4.64631
1683	6	46.435	Block164185	0.345478	-0.10254	-0.126046	4.64631
1684	6	46.435	Block153206	0.345478	-0.10254	-0.126046	4.64631
1685	6	46.435	Block164188	0.345478	-0.10254	-0.126046	4.64631
1686	6	46.435	Block158747	0.345478	-0.10254	-0.126046	4.64631
1687	6	46.435	Block166537	0.345478	-0.10254	-0.126046	4.64631
1688	6	46.435	Block164182	0.345478	-0.10254	-0.126046	4.64631
1689	6	46.435	Block142031	0.345478	-0.10254	-0.126046	4.64631
1690	6	46.435	Block153202	0.345478	-0.10254	-0.126046	4.64631
1691	6	46.435	Block158744	0.345478	-0.10254	-0.126046	4.64631
1692	6	46.435	Block142030	0.345478	-0.10254	-0.126046	4.64631
1693	6	46.435	Block160757	0.345478	-0.10254	-0.126046	4.64631
1694	6	46.435	Block153180	0.345478	-0.10254	-0.126046	4.64631
1695	6	46.435	Block164183	0.345478	-0.10254	-0.126046	4.64631
1696	6	47.435	Block146555	0.318363	-0.0967989	-0.11326	3.97552
1697	6	47.435	Block142207	0.318363	-0.0967989	-0.11326	3.97552
1698	6	47.435	Block146553	0.318363	-0.0967989	-0.11326	3.97552
1699	6	47.435	Block142208	0.318363	-0.0967989	-0.11326	3.97552
1700	6	47.435	Block147693	0.318363	-0.0967989	-0.11326	3.97552
1701	6	47.435	Block153485	0.318363	-0.0967989	-0.11326	3.97552
1702	6	47.435	Block158928	0.318363	-0.0967989	-0.11326	3.97552
1703	6	47.435	Block153172	0.318363	-0.0967989	-0.11326	3.97552
1704	6	47.435	Block146450	0.318363	-0.0967989	-0.11326	3.97552
1705	6	47.435	Block146552	0.318363	-0.0967989	-0.11326	3.97552
1706	6	47.435	Block154252	0.318363	-0.0967989	-0.11326	3.97552
1707	6	47.435	Block158631	0.318363	-0.0967989	-0.11326	3.97552
1708	6	47.435	Block166539	0.318363	-0.0967989	-0.11326	3.97552
1709	6	47.435	Block166540	0.318363	-0.0967989	-0.11326	3.97552
1710	6	47.435	Block146556	0.318363	-0.0967989	-0.11326	3.97552
1711	6	47.435	Block154250	0.318363	-0.0967989	-0.11326	3.97552
1712	6	48.935	Block140224	0.322655	-0.112446	-0.110479	4.73246
1713	6	49.935	Block153134	0.288121	-0.0959799	-0.106826	3.75978
1714	6	49.935	Block145798	0.288121	-0.0959799	-0.106826	3.75978
1715	6	49.935	Block142375	0.288121	-0.0959799	-0.106826	3.75978
1716	6	49.935	Block145695	0.288121	-0.0959799	-0.106826	3.75978
1717	6	49.935	Block142214	0.288121	-0.0959799	-0.106826	3.75978
1718	6	49.935	Block158700	0.288121	-0.0959799	-0.106826	3.75978
1719	6	49.935	Block148936	0.288121	-0.0959799	-0.106826	3.75978
1720	6	49.935	Block146337	0.288121	-0.0959799	-0.106826	3.75978
1721	6	49.935	Block158827	0.288121	-0.0959799	-0.106826	3.75978
1722	6	49.935	Block158931	0.288121	-0.0959799	-0.106826	3.75978
1723	6	49.935	Block146373	0.288121	-0.0959799	-0.106826	3.75978
1724	6	49.935	Block158832	0.288121	-0.0959799	-0.106826	3.75978
1725	6	49.935	Block164176	0.288121	-0.0959799	-0.106826	3.75978
1726	6	49.935	Block153175	0.288121	-0.0959799	-0.106826	3.75978
1727	6	49.935	Block142264	0.288121	-0.0959799	-0.106826	3.75978
1728	6	49.935	Block146339	0.288121	-0.0959799	-0.106826	3.75978
1729	6	49.935	Block141853	0.288121	-0.0959799	-0.106826	3.75978
1730	6	49.935	Block155930	0.288121	-0.0959799	-0.106826	3.75978
1731	6	49.935	Block154263	0.288121	-0.0959799	-0.106826	3.75978
1732	6	49.935	Block146333	0.288121	-0.0959799	-0.106826	3.75978
1733	6	49.935	Block155909	0.288121	-0.0959799	-0.106826	3.75978
1734	6	49.935	Block147973	0.288121	-0.0959799	-0.106826	3.75978
1735	6	49.935	Block145829	0.288121	-0.0959799	-0.106826	3.75978
1736	6	49.935	Block158644	0.288121	-0.0959799	-0.106826	3.75978
1737	6	49.935	Block155677	0.288121	-0.0959799	-0.106826	3.75978
1738	6	49.935	Block145687	0.288121	-0.0959799	-0.106826	3.75978
1739	6	49.935	Block166535	0.288121	-0.0959799	-0.106826	3.75978
1740	6	49.935	Block158707	0.288121	-0.0959799	-0.106826	3.75978
1741	6	49.935	Block158935	0.288121	-0.0959799	-0.106826	3.75978
1742	6	49.935	Block145725	0.288121	-0.0959799	-0.106826	3.75978
1743	6	49.935	Block141811	0.288121	-0.0959799	-0.106826	3.75978
1744	6	49.935	Block145569	0.288121	-0.0959799	-0.106826	3.75978
1745	6	49.935	Block146269	0.288121	-0.0959799	-0.106826	3.75978
1746	6	49.935	Block158577	0.288121	-0.0959799	-0.106826	3.75978
1747	6	49.935	Block146359	0.288121	-0.0959799	-0.106826	3.75978
1748	6	49.935	Block166548	0.288121	-0.0959799	-0.106826	3.75978
1749	6	49.935	Block153152	0.288121	-0.0959799	-0.106826	3.75978
1750	6	49.935	Block158575	0.288121	-0.0959799	-0.106826	3.75978
1751	6	49.935	Block148500	0.288121	-0.0959799	-0.106826	3.75978
1752	6	49.935	Block148963	0.288121	-0.0959799	-0.106826	3.75978
1753	6	49.935	Block154266	0.288121	-0.0959799	-0.106826	3.75978
1754	6	49.935	Block154261	0.288121	-0.0959799	-0.106826	3.75978
1755	6	49.935	Block153177	0.288121	-0.0959799	-0.106826	3.75978
1756	6	49.935	Block152031	0.288121	-0.0959799	-0.106826	3.75978
1757	6	49.935	Block166553	0.288121	-0.0959799	-0.106826	3.75978
1758	6	49.935	Block145577	0.288121	-0.0959799	-0.106826	3.75978
1759	6	49.935	Block141823	0.288121	-0.0959799	-0.106826	3.75978
1760	6	49.935	Block153174	0.288121	-0.0959799	-0.106826	3.75978
1761	6	49.935	Block153145	0.288121	-0.0959799	-0.106826	3.75978
1762	6	49.935	Block153171	0.288121	-0.0959799	-0.106826	3.75978
1763	6	49.935	Block154470	0.288121	-0.0959799	-0.106826	3.75978
1764	6	49.935	Block142242	0.288121	-0.0959799	-0.106826	3.75978
1765	6	49.935	Block158681	0.288121	-0.0959799	-0.106826	3.75978
1766	6	49.935	Block155907	0.288121	-0.0959799	-0.106826	3.75978
1767	6	49.935	Block146330	0.288121	-0.0959799	-0.106826	3.75978
1768	6	49.935	Block163639	0.288121	-0.0959799	-0.106826	3.75978
1769	6	49.935	Block142312	0.288121	-0.0959799	-0.106826	3.75978
1770	6	49.935	Block145552	0.288121	-0.0959799	-0.106826	3.75978
1771	6	49.935	Block154574	0.288121	-0.0959799	-0.106826	3.75978
1772	6	49.935	Block142074	0.288121	-0.0959799	-0.106826	3.75978
1773	6	49.935	Block146329	0.288121	-0.0959799	-0.106826	3.75978
1774	6	49.935	Block145723	0.288121	-0.0959799	-0.106826	3.75978
1775	6	49.935	Block156871	0.288121	-0.0959799	-0.106826	3.75978
1776	6	49.935	Block158674	0.288121	-0.0959799	-0.106826	3.75978
1777	6	49.935	Block158736	0.288121	-0.0959799	-0.106826	3.75978
1778	6	49.935	Block154275	0.288121	-0.0959799	-0.106826	3.75978
1779	6	49.935	Block153153	0.288121	-0.0959799	-0.106826	3.75978
1780	6	49.935	Block153194	0.288121	-0.0959799	-0.106826	3.75978
1781	6	49.935	Block146341	0.288121	-0.0959799	-0.106826	3.75978
1782	6	49.935	Block146805	0.288121	-0.0959799	-0.106826	3.75978
1783	6	49.935	Block146374	0.288121	-0.0959799	-0.106826	3.75978
1784	6	49.935	Block153687	0.288121	-0.0959799	-0.106826	3.75978
1785	6	49.935	Block158553	0.288121	-0.0959799	-0.106826	3.75978
1786	6	49.935	Block145730	0.288121	-0.0959799	-0.106826	3.75978
1787	6	49.935	Block154271	0.288121	-0.0959799	-0.106826	3.75978
1788	6	49.935	Block153154	0.288121	-0.0959799	-0.106826	3.75978
1789	6	49.935	Block146328	0.288121	-0.0959799	-0.106826	3.75978
1790	6	49.935	Block145811	0.288121	-0.0959799	-0.106826	3.75978
1791	6	49.935	Block141819	0.288121	-0.0959799	-0.106826	3.75978
1792	6	49.935	Block159075	0.288121	-0.0959799	-0.106826	3.75978
1793	6	49.935	Block142040	0.288121	-0.0959799	-0.106826	3.75978
1794	6	49.935	Block146344	0.288121	-0.0959799	-0.106826	3.75978
1795	6	49.935	Block158693	0.288121	-0.0959799	-0.106826	3.75978
1796	6	49.935	Block140241	0.288121	-0.0959799	-0.106826	3.75978
1797	6	49.935	Block153121	0.288121	-0.0959799	-0.106826	3.75978
1798	6	49.935	Block141079	0.288121	-0.0959799	-0.106826	3.75978
1799	6	49.935	Block141899	0.288121	-0.0959799	-0.106826	3.75978
1800	6	49.935	Block141080	0.288121	-0.0959799	-0.106826	3.75978
1801	6	49.935	Block158375	0.288121	-0.0959799	-0.106826	3.75978
1802	6	49.935	Block154258	0.288121	-0.0959799	-0.106826	3.75978
1803	6	49.935	Block154272	0.288121	-0.0959799	-0.106826	3.75978
1804	6	49.935	Block142049	0.288121	-0.0959799	-0.106826	3.75978
1805	6	49.935	Block142154	0.288121	-0.0959799	-0.106826	3.75978
1806	6	49.935	Block148965	0.288121	-0.0959799	-0.106826	3.75978
1807	6	49.935	Block145438	0.288121	-0.0959799	-0.106826	3.75978
1808	6	49.935	Block153189	0.288121	-0.0959799	-0.106826	3.75978
1809	6	49.935	Block145426	0.288121	-0.0959799	-0.106826	3.75978
1810	6	49.935	Block145682	0.288121	-0.0959799	-0.106826	3.75978
1811	6	49.935	Block153166	0.288121	-0.0959799	-0.106826	3.75978
1812	6	49.935	Block148952	0.288121	-0.0959799	-0.106826	3.75978
1813	6	49.935	Block145365	0.288121	-0.0959799	-0.106826	3.75978
1814	6	49.935	Block163041	0.288121	-0.0959799	-0.106826	3.75978
1815	6	49.935	Block163038	0.288121	-0.0959799	-0.106826	3.75978
1816	6	49.935	Block145700	0.288121	-0.0959799	-0.106826	3.75978
1817	6	49.935	Block153116	0.288121	-0.0959799	-0.106826	3.75978
1818	6	49.935	Block146347	0.288121	-0.0959799	-0.106826	3.75978
1819	6	49.935	Block141828	0.288121	-0.0959799	-0.106826	3.75978
1820	6	49.935	Block142265	0.288121	-0.0959799	-0.106826	3.75978
1821	6	49.935	Block148971	0.288121	-0.0959799	-0.106826	3.75978
1822	6	49.935	Block145696	0.288121	-0.0959799	-0.106826	3.75978
1823	6	49.935	Block146472	0.288121	-0.0959799	-0.106826	3.75978
1824	6	49.935	Block145645	0.288121	-0.0959799	-0.106826	3.75978
1825	6	49.935	Block158690	0.288121	-0.0959799	-0.106826	3.75978
1826	6	49.935	Block148961	0.288121	-0.0959799	-0.106826	3.75978
1827	6	49.935	Block148948	0.288121	-0.0959799	-0.106826	3.75978
1828	6	49.935	Block158833	0.288121	-0.0959799	-0.106826	3.75978
1829	6	49.935	Block163994	0.288121	-0.0959799	-0.106826	3.75978
1830	6	49.935	Block153170	0.288121	-0.0959799	-0.106826	3.75978
1831	6	49.935	Block141825	0.288121	-0.0959799	-0.106826	3.75978
1832	6	49.935	Block158683	0.288121	-0.0959799	-0.106826	3.75978
1833	6	49.935	Block142372	0.288121	-0.0959799	-0.106826	3.75978
1834	6	49.935	Block154773	0.288121	-0.0959799	-0.106826	3.75978
1835	6	49.935	Block155905	0.288121	-0.0959799	-0.106826	3.75978
1836	6	49.935	Block142355	0.288121	-0.0959799	-0.106826	3.75978
1837	6	49.935	Block155900	0.288121	-0.0959799	-0.106826	3.75978
1838	6	49.935	Block145635	0.288121	-0.0959799	-0.106826	3.75978
1839	6	49.935	Block142034	0.288121	-0.0959799	-0.106826	3.75978
1840	6	49.935	Block142137	0.288121	-0.0959799	-0.106826	3.75978
1841	6	49.935	Block154353	0.288121	-0.0959799	-0.106826	3.75978
1842	6	49.935	Block153406	0.288121	-0.0959799	-0.106826	3.75978
1843	6	49.935	Block147115	0.288121	-0.0959799	-0.106826	3.75978
1844	6	49.935	Block142329	0.288121	-0.0959799	-0.106826	3.75978
1845	6	49.935	Block158686	0.288121	-0.0959799	-0.106826	3.75978
1846	6	49.935	Block153167	0.288121	-0.0959799	-0.106826	3.75978
1847	6	49.935	Block142332	0.288121	-0.0959799	-0.106826	3.75978
1848	6	49.935	Block163042	0.288121	-0.0959799	-0.106826	3.75978
1849	6	49.935	Block140225	0.288121	-0.0959799	-0.106826	3.75978
1850	6	49.935	Block155906	0.288121	-0.0959799	-0.106826	3.75978
1851	6	49.935	Block145824	0.288121	-0.0959799	-0.106826	3.75978
1852	6	49.935	Block166300	0.288121	-0.0959799	-0.106826	3.75978
1853	6	49.935	Block145828	0.288121	-0.0959799	-0.106826	3.75978
1854	6	49.935	Block146366	0.288121	-0.0959799	-0.106826	3.75978
1855	6	49.935	Block145484	0.288121	-0.0959799	-0.106826	3.75978
1856	6	49.935	Block155903	0.288121	-0.0959799	-0.106826	3.75978
1857	6	49.935	Block158704	0.288121	-0.0959799	-0.106826	3.75978
1858	6	49.935	Block158591	0.288121	-0.0959799	-0.106826	3.75978
1859	6	49.935	Block142041	0.288121	-0.0959799	-0.106826	3.75978
1860	6	49.935	Block158866	0.288121	-0.0959799	-0.106826	3.75978
1861	6	49.935	Block148953	0.288121	-0.0959799	-0.106826	3.75978
1862	6	49.935	Block145761	0.288121	-0.0959799	-0.106826	3.75978
1863	6	49.935	Block145449	0.288121	-0.0959799	-0.106826	3.75978
1864	6	49.935	Block146342	0.288121	-0.0959799	-0.106826	3.75978
1865	6	49.935	Block145799	0.288121	-0.0959799	-0.106826	3.75978
1866	6	49.935	Block146334	0.288121	-0.0959799	-0.106826	3.75978
1867	6	49.935	Block158887	0.288121	-0.0959799	-0.106826	3.75978
1868	6	49.935	Block142102	0.288121	-0.0959799	-0.106826	3.75978
1869	6	49.935	Block145523	0.288121	-0.0959799	-0.106826	3.75978
1870	6	49.935	Block148969	0.288121	-0.0959799	-0.106826	3.75978
1871	6	49.935	Block145572	0.288121	-0.0959799	-0.106826	3.75978
1872	6	49.935	Block158676	0.288121	-0.0959799	-0.106826	3.75978
1873	6	49.935	Block146345	0.288121	-0.0959799	-0.106826	3.75978
1874	6	49.935	Block153143	0.288121	-0.0959799	-0.106826	3.75978
1875	6	49.935	Block142212	0.288121	-0.0959799	-0.106826	3.75978
1876	6	49.935	Block154268	0.288121	-0.0959799	-0.106826	3.75978
1877	6	49.935	Block158441	0.288121	-0.0959799	-0.106826	3.75978
1878	6	49.935	Block158679	0.288121	-0.0959799	-0.106826	3.75978
1879	6	49.935	Block148959	0.288121	-0.0959799	-0.106826	3.75978
1880	6	49.935	Block156285	0.288121	-0.0959799	-0.106826	3.75978
1881	6	49.935	Block145440	0.288121	-0.0959799	-0.106826	3.75978
1882	6	49.935	Block158831	0.288121	-0.0959799	-0.106826	3.75978
1883	6	49.935	Block155901	0.288121	-0.0959799	-0.106826	3.75978
1884	6	49.935	Block145778	0.288121	-0.0959799	-0.106826	3.75978
1885	6	49.935	Block148924	0.288121	-0.0959799	-0.106826	3.75978
1886	6	49.935	Block145773	0.288121	-0.0959799	-0.106826	3.75978
1887	6	49.935	Block159078	0.288121	-0.0959799	-0.106826	3.75978
1888	6	49.935	Block141829	0.288121	-0.0959799	-0.106826	3.75978
1889	6	49.935	Block142083	0.288121	-0.0959799	-0.106826	3.75978
1890	6	49.935	Block162333	0.288121	-0.0959799	-0.106826	3.75978
1891	6	49.935	Block154273	0.288121	-0.0959799	-0.106826	3.75978
1892	6	49.935	Block153159	0.288121	-0.0959799	-0.106826	3.75978
1893	6	49.935	Block154270	0.288121	-0.0959799	-0.106826	3.75978
1894	6	49.935	Block142043	0.288121	-0.0959799	-0.106826	3.75978
1895	6	49.935	Block145712	0.288121	-0.0959799	-0.106826	3.75978
1896	6	49.935	Block146332	0.288121	-0.0959799	-0.106826	3.75978
1897	6	49.935	Block148932	0.288121	-0.0959799	-0.106826	3.75978
1898	6	49.935	Block153160	0.288121	-0.0959799	-0.106826	3.75978
1899	6	49.935	Block146325	0.288121	-0.0959799	-0.106826	3.75978
1900	6	49.935	Block142370	0.288121	-0.0959799	-0.106826	3.75978
1901	6	49.935	Block153130	0.288121	-0.0959799	-0.106826	3.75978
1902	6	49.935	Block158573	0.288121	-0.0959799	-0.106826	3.75978
1903	6	49.935	Block145752	0.288121	-0.0959799	-0.106826	3.75978
1904	6	49.935	Block148960	0.288121	-0.0959799	-0.106826	3.75978
1905	6	49.935	Block158870	0.288121	-0.0959799	-0.106826	3.75978
1906	6	49.935	Block140239	0.288121	-0.0959799	-0.106826	3.75978
1907	6	49.935	Block158697	0.288121	-0.0959799	-0.106826	3.75978
1908	6	49.935	Block145454	0.288121	-0.0959799	-0.106826	3.75978
1909	6	49.935	Block154468	0.288121	-0.0959799	-0.106826	3.75978
1910	6	49.935	Block158766	0.288121	-0.0959799	-0.106826	3.75978
1911	6	49.935	Block158549	0.288121	-0.0959799	-0.106826	3.75978
1912	6	49.935	Block145728	0.288121	-0.0959799	-0.106826	3.75978
1913	6	49.935	Block155902	0.288121	-0.0959799	-0.106826	3.75978
1914	6	49.935	Block158709	0.288121	-0.0959799	-0.106826	3.75978
1915	6	49.935	Block142044	0.288121	-0.0959799	-0.106826	3.75978
1916	6	49.935	Block141822	0.288121	-0.0959799	-0.106826	3.75978
1917	6	49.935	Block145741	0.288121	-0.0959799	-0.106826	3.75978
1918	6	49.935	Block145727	0.288121	-0.0959799	-0.106826	3.75978
1919	6	49.935	Block145417	0.288121	-0.0959799	-0.106826	3.75978
1920	6	49.935	Block142192	0.288121	-0.0959799	-0.106826	3.75978
1921	6	49.935	Block154277	0.288121	-0.0959799	-0.106826	3.75978
1922	6	49.935	Block146331	0.288121	-0.0959799	-0.106826	3.75978
1923	6	49.935	Block146362	0.288121	-0.0959799	-0.106826	3.75978
1924	6	49.935	Block155676	0.288121	-0.0959799	-0.106826	3.75978
1925	6	49.935	Block153179	0.288121	-0.0959799	-0.106826	3.75978
1926	6	49.935	Block153178	0.288121	-0.0959799	-0.106826	3.75978
1927	6	49.935	Block158639	0.288121	-0.0959799	-0.106826	3.75978
1928	6	49.935	Block155477	0.288121	-0.0959799	-0.106826	3.75978
1929	6	49.935	Block145814	0.288121	-0.0959799	-0.106826	3.75978
1930	6	49.935	Block154276	0.288121	-0.0959799	-0.106826	3.75978
1931	6	49.935	Block142371	0.288121	-0.0959799	-0.106826	3.75978
1932	6	49.935	Block148951	0.288121	-0.0959799	-0.106826	3.75978
1933	6	49.935	Block156163	0.288121	-0.0959799	-0.106826	3.75978
1934	6	49.935	Block145732	0.288121	-0.0959799	-0.106826	3.75978
1935	6	49.935	Block143916	0.288121	-0.0959799	-0.106826	3.75978
1936	6	49.935	Block145757	0.288121	-0.0959799	-0.106826	3.75978
1937	6	49.935	Block145711	0.288121	-0.0959799	-0.106826	3.75978
1938	6	49.935	Block158826	0.288121	-0.0959799	-0.106826	3.75978
1939	6	49.935	Block145679	0.288121	-0.0959799	-0.106826	3.75978
1940	6	49.935	Block141855	0.288121	-0.0959799	-0.106826	3.75978
1941	6	49.935	Block146343	0.288121	-0.0959799	-0.106826	3.75978
1942	6	49.935	Block145441	0.288121	-0.0959799	-0.106826	3.75978
1943	6	49.935	Block142129	0.288121	-0.0959799	-0.106826	3.75978
1944	6	49.935	Block146380	0.288121	-0.0959799	-0.106826	3.75978
1945	6	49.935	Block154267	0.288121	-0.0959799	-0.106826	3.75978
1946	6	49.935	Block145649	0.288121	-0.0959799	-0.106826	3.75978
1947	6	49.935	Block158696	0.288121	-0.0959799	-0.106826	3.75978
1948	6	49.935	Block156293	0.288121	-0.0959799	-0.106826	3.75978
1949	6	49.935	Block145643	0.288121	-0.0959799	-0.106826	3.75978
1950	6	49.935	Block164031	0.288121	-0.0959799	-0.106826	3.75978
1951	6	49.935	Block158725	0.288121	-0.0959799	-0.106826	3.75978
1952	6	49.935	Block153155	0.288121	-0.0959799	-0.106826	3.75978
1953	6	49.935	Block156183	0.288121	-0.0959799	-0.106826	3.75978
1954	6	49.935	Block142220	0.288121	-0.0959799	-0.106826	3.75978
1955	6	49.935	Block153151	0.288121	-0.0959799	-0.106826	3.75978
1956	6	49.935	Block158646	0.288121	-0.0959799	-0.106826	3.75978
1957	6	49.935	Block156858	0.288121	-0.0959799	-0.106826	3.75978
1958	6	49.935	Block141852	0.288121	-0.0959799	-0.106826	3.75978
1959	6	49.935	Block163040	0.288121	-0.0959799	-0.106826	3.75978
1960	6	49.935	Block145715	0.288121	-0.0959799	-0.106826	3.75978
1961	6	49.935	Block142042	0.288121	-0.0959799	-0.106826	3.75978
1962	6	49.935	Block155957	0.288121	-0.0959799	-0.106826	3.75978
1963	6	49.935	Block153132	0.288121	-0.0959799	-0.106826	3.75978
1964	6	49.935	Block154269	0.288121	-0.0959799	-0.106826	3.75978
1965	6	49.935	Block145826	0.288121	-0.0959799	-0.106826	3.75978
1966	6	49.935	Block158694	0.288121	-0.0959799	-0.106826	3.75978
1967	6	49.935	Block145599	0.288121	-0.0959799	-0.106826	3.75978
1968	6	49.935	Block146348	0.288121	-0.0959799	-0.106826	3.75978
1969	6	49.935	Block147970	0.288121	-0.0959799	-0.106826	3.75978
1970	6	49.935	Block164191	0.288121	-0.0959799	-0.106826	3.75978
1971	6	49.935	Block164194	0.288121	-0.0959799	-0.106826	3.75978
1972	6	49.935	Block158576	0.288121	-0.0959799	-0.106826	3.75978
1973	6	49.935	Block163998	0.288121	-0.0959799	-0.106826	3.75978
1974	6	49.935	Block158788	0.288121	-0.0959799	-0.106826	3.75978
1975	6	49.935	Block141776	0.288121	-0.0959799	-0.106826	3.75978
1976	6	49.935	Block158557	0.288121	-0.0959799	-0.106826	3.75978
1977	6	49.935	Block148987	0.288121	-0.0959799	-0.106826	3.75978
1978	6	49.935	Block148912	0.288121	-0.0959799	-0.106826	3.75978
1979	6	49.935	Block166586	0.288121	-0.0959799	-0.106826	3.75978
1980	6	49.935	Block142048	0.288121	-0.0959799	-0.106826	3.75978
1981	6	49.935	Block148935	0.288121	-0.0959799	-0.106826	3.75978
1982	6	49.935	Block153165	0.288121	-0.0959799	-0.106826	3.75978
1983	6	49.935	Block158932	0.288121	-0.0959799	-0.106826	3.75978
1984	6	49.935	Block145574	0.288121	-0.0959799	-0.106826	3.75978
1985	6	49.935	Block146358	0.288121	-0.0959799	-0.106826	3.75978
1986	6	49.935	Block160758	0.288121	-0.0959799	-0.106826	3.75978
1987	6	49.935	Block147113	0.288121	-0.0959799	-0.106826	3.75978
1988	6	49.935	Block145729	0.288121	-0.0959799	-0.106826	3.75978
1989	6	50.436	Block158658	0.198479	-0.0909965	-0.100336	3.35592
1990	6	50.436	Block158661	0.198479	-0.0909965	-0.100336	3.35592
1991	6	50.436	Block145784	0.198479	-0.0909965	-0.100336	3.35592
1992	6	50.436	Block153146	0.198479	-0.0909965	-0.100336	3.35592
1993	6	50.436	Block153147	0.198479	-0.0909965	-0.100336	3.35592
1994	6	50.436	Block147974	0.198479	-0.0909965	-0.100336	3.35592
1995	6	50.436	Block153144	0.198479	-0.0909965	-0.100336	3.35592
1996	6	50.436	Block160770	0.198479	-0.0909965	-0.100336	3.35592
1997	6	50.436	Block158660	0.198479	-0.0909965	-0.100336	3.35592
[truncated: 1,921 more rows]

## Sheet: TGW9.1
Table S6. List of 45 genes located in the QTL TGW9.1
Gene ID	E_value	GO Annotation	KEGG Annotation	Swiss-Prot Annotation	nr Annotation
SMEL_009g329470	0	Molecular Function: obsolete signal transducer activity (GO:0004871);; Biological Process: signal transduction (GO:0007165);; Biological Process: response to light stimulus (GO:0009416);; Biological Process: pollen tube growth (GO:0009860);;	--	BTB/POZ domain-containing protein At1g03010 GN=At1g03010 OS=Arabidopsis thaliana (Mouse-ear cress) PE=2 SV=1	PREDICTED: BTB/POZ domain-containing protein At1g03010-like isoform X1 [Solanum tuberosum]
SMEL_009g329480	2.3e-232	Molecular Function: metal ion binding (GO:0046872);;	--	Zinc finger CCCH domain-containing protein 32 GN=At2g47850 OS=Arabidopsis thaliana (Mouse-ear cress) PE=2 SV=2	PREDICTED: zinc finger CCCH domain-containing protein 32-like isoform X1 [Solanum tuberosum]
SMEL_009g329490	0	--	K14794|0.0e+00|sly:101244787|K14794 ribosomal RNA-processing protein 12 | (RefSeq) RRP12-like protein	--	PREDICTED: RRP12-like protein [Solanum lycopersicum]
SMEL_009g329500	8.2e-75	--	--	F-box/kelch-repeat protein At3g27150 GN=At3g27150 OS=Arabidopsis thaliana (Mouse-ear cress) PE=2 SV=1	PREDICTED: F-box/kelch-repeat protein At3g27150-like [Solanum tuberosum]
SMEL_009g329510	3.7e-36	--	--	G-type lectin S-receptor-like serine/threonine-protein kinase At4g03230 (Precursor) GN=At4g03230 OS=Arabidopsis thaliana (Mouse-ear cress) PE=3 SV=3	PREDICTED: F-box/kelch-repeat protein At3g27150-like [Solanum tuberosum]
SMEL_009g329520	7.9e-38	--	K01054|1.8e-38|sly:101256743|K01054 acylglycerol lipase [EC:3.1.1.23] | (RefSeq) caffeoylshikimate esterase	Caffeoylshikimate esterase GN=CSE OS=Arabidopsis thaliana (Mouse-ear cress) PE=1 SV=1	PREDICTED: caffeoylshikimate esterase [Solanum lycopersicum]
SMEL_009g329530	1.5e-218	Cellular Component: cytoplasm (GO:0005737);; Biological Process: translational termination (GO:0006415);; Biological Process: heme biosynthetic process (GO:0006783);; Biological Process: chloroplast relocation (GO:0009902);; Biological Process: thylakoid membrane organization (GO:0010027);; Biological Process: carotenoid biosynthetic process (GO:0016117);; Molecular Function: translation release …	K02835|3.3e-219|sly:101256123|K02835 peptide chain release factor 1 | (RefSeq) peptide chain release factor APG3, chloroplastic	Peptide chain release factor APG3, chloroplastic {ECO:0000305} (Precursor) OS=Arabidopsis thaliana (Mouse-ear cress) PE=2 SV=1	PREDICTED: peptide chain release factor 1-like, mitochondrial [Solanum lycopersicum]
SMEL_009g329540	0	--	--	--	PREDICTED: spermatogenesis-associated protein 20-like [Solanum tuberosum]
SMEL_009g329550	0	--	--	--	PREDICTED: uncharacterized protein LOC102605571 isoform X1 [Solanum tuberosum]
SMEL_009g329560	0	Biological Process: ubiquitin-dependent protein catabolic process (GO:0006511);; Cellular Component: cullin-RING ubiquitin ligase complex (GO:0031461);; Molecular Function: ubiquitin protein ligase binding (GO:0031625);;	K03347|0.0e+00|sot:102605003|K03347 cullin 1 | (RefSeq) cullin-1-like	Cullin-1 GN=CUL1 OS=Arabidopsis thaliana (Mouse-ear cress) PE=1 SV=1	PREDICTED: cullin-1-like [Solanum tuberosum]
SMEL_009g329570	0	--	--	Homeobox protein LUMINIDEPENDENS GN=LD OS=Arabidopsis thaliana (Mouse-ear cress) PE=1 SV=2	PREDICTED: homeobox protein LUMINIDEPENDENS-like [Solanum tuberosum]
SMEL_009g329580	4.8e-71	--	--	Metal tolerance protein 2 GN=OsJ_10821 OS=Oryza sativa subsp. japonica (Rice) PE=2 SV=1	PREDICTED: metal tolerance protein C1-like isoform X1 [Solanum tuberosum]
SMEL_009g329590	3.3e-76	--	--	Metal tolerance protein C1 GN=F17A22.22 OS=Arabidopsis thaliana (Mouse-ear cress) PE=2 SV=1	PREDICTED: metal tolerance protein 2 isoform X1 [Solanum lycopersicum]
SMEL_009g329600	4e-67	Cellular Component: nucleus (GO:0005634);; Biological Process: regulation of transcription, DNA-templated (GO:0006355);; Molecular Function: sequence-specific DNA binding (GO:0043565);; Molecular Function: protein heterodimerization activity (GO:0046982);;	K08065|9.0e-68|sot:102587650|K08065 nuclear transcription Y subunit beta | (RefSeq) nuclear transcription factor Y subunit B-5-like	Nuclear transcription factor Y subunit B-5 GN=NFYB5 OS=Arabidopsis thaliana (Mouse-ear cress) PE=2 SV=1	PREDICTED: nuclear transcription factor Y subunit B-5-like [Solanum tuberosum]
SMEL_009g329610	3e-58	Cellular Component: nucleus (GO:0005634);; Biological Process: regulation of transcription, DNA-templated (GO:0006355);; Molecular Function: sequence-specific DNA binding (GO:0043565);; Molecular Function: protein heterodimerization activity (GO:0046982);;	K08065|6.8e-59|sot:102587650|K08065 nuclear transcription Y subunit beta | (RefSeq) nuclear transcription factor Y subunit B-5-like	Nuclear transcription factor Y subunit B-5 GN=NFYB5 OS=Arabidopsis thaliana (Mouse-ear cress) PE=2 SV=1	PREDICTED: nuclear transcription factor Y subunit B-5-like [Solanum tuberosum]
SMEL_009g329620	6.3e-259	--	--	Protein indeterminate-domain 2 {ECO:0000303|PubMed:16784536} OS=Arabidopsis thaliana (Mouse-ear cress) PE=2 SV=1	PREDICTED: zinc finger protein JACKDAW-like [Solanum tuberosum]
SMEL_009g329630	0	--	K03549|0.0e+00|sot:102587332|K03549 KUP system potassium uptake protein | (RefSeq) potassium transporter 5-like	Potassium transporter 5 OS=Oryza sativa subsp. japonica (Rice) PE=2 SV=2	PREDICTED: potassium transporter 5-like [Solanum tuberosum]
SMEL_009g329640	0	--	K03549|0.0e+00|sot:102587001|K03549 KUP system potassium uptake protein | (RefSeq) potassium transporter 5-like	Potassium transporter 5 OS=Oryza sativa subsp. japonica (Rice) PE=2 SV=2	PREDICTED: potassium transporter 5-like [Solanum tuberosum]
SMEL_009g329650	1.6e-51	--	--	Transcription factor bHLH55 OS=Arabidopsis thaliana (Mouse-ear cress) PE=2 SV=1	PREDICTED: transcription factor bHLH125-like [Solanum lycopersicum]
SMEL_009g329660	0	--	K03549|0.0e+00|sot:102602546|K03549 KUP system potassium uptake protein | (RefSeq) potassium transporter 5-like	Potassium transporter 5 OS=Oryza sativa subsp. japonica (Rice) PE=2 SV=2	PREDICTED: potassium transporter 5-like [Solanum tuberosum]
SMEL_009g329670	5e-265	Biological Process: nuclear division (GO:0000280);; Biological Process: double-strand break repair via homologous recombination (GO:0000724);; Biological Process: cytokinesis by cell plate formation (GO:0000911);; Molecular Function: protein serine/threonine kinase activity (GO:0004674);; Molecular Function: ATP binding (GO:0005524);; Biological Process: DNA replication initiation (GO:0006270);; …	K06632|6.6e-266|spen:107029703|K06632 wee1-like protein kinase [EC:2.7.11.1] | (RefSeq) wee1-like protein kinase	Wee1-like protein kinase GN=WEE1 OS=Arabidopsis thaliana (Mouse-ear cress) PE=1 SV=1	protein kinase WEE1 [Solanum lycopersicum]
SMEL_009g329680	5.8e-161	--	--	--	PREDICTED: uncharacterized protein LOC104213798 [Nicotiana sylvestris]
SMEL_009g329690	1.3e-106	Molecular Function: glutathione transferase activity (GO:0004364);; Biological Process: response to stress (GO:0006950);; Biological Process: auxin-activated signaling pathway (GO:0009734);;	K00799|4.7e-105|spen:107029376|K00799 glutathione S-transferase [EC:2.5.1.18] | (RefSeq) glutathione S-transferase PARB-like	Glutathione S-transferase PARB GN=PARB OS=Nicotiana tabacum (Common tobacco) PE=2 SV=1	PREDICTED: glutathione S-transferase PARB [Nicotiana sylvestris]
SMEL_009g329700	1.2e-14	Cellular Component: mitochondrion (GO:0005739);; Cellular Component: membrane (GO:0016020);; Biological Process: electron transport chain (GO:0022900);;	K00416|2.7e-15|sly:101252432|K00416 ubiquinol-cytochrome c reductase subunit 6 | (RefSeq) cytochrome b-c1 complex subunit 6	Cytochrome b-c1 complex subunit 6 OS=Solanum tuberosum (Potato) PE=1 SV=2	PREDICTED: cytochrome b-c1 complex subunit 6 [Solanum lycopersicum]
SMEL_009g329710	1.4e-233	Biological Process: thylakoid membrane organization (GO:0010027);; Biological Process: photosystem II oxygen evolving complex assembly (GO:0010270);;	--	Protein LOW PSII ACCUMULATION 1, chloroplastic (Precursor) GN=LPA1 OS=Arabidopsis thaliana (Mouse-ear cress) PE=1 SV=1	PREDICTED: protein LOW PSII ACCUMULATION 1, chloroplastic [Solanum lycopersicum]
SMEL_009g329720	2.7e-53	Biological Process: cell communication (GO:0007154);; Biological Process: signaling (GO:0044700);;	--	Rapid alkalinization factor (Precursor) GN=RALF OS=Nicotiana tabacum (Common tobacco) PE=1 SV=1	PREDICTED: rapid alkalinization factor [Solanum lycopersicum]
SMEL_009g329730	7.4e-234	Molecular Function: alpha-1,3-mannosyltransferase activity (GO:0000033);; Cellular Component: endoplasmic reticulum (GO:0005783);; Biological Process: protein glycosylation (GO:0006486);; Cellular Component: integral component of membrane (GO:0016021);; Biological Process: cellulose biosynthetic process (GO:0030244);; Biological Process: Golgi vesicle transport (GO:0048193);;	K03845|1.7e-234|sot:102598887|K03845 alpha-1,3-mannosyltransferase [EC:2.4.1.258] | (RefSeq) dol-P-Man:Man(5)GlcNAc(2)-PP-Dol alpha-1,3-mannosyltransferase	Dol-P-Man:Man(5)GlcNAc(2)-PP-Dol alpha-1,3-mannosyltransferase GN=ALG3 OS=Arabidopsis thaliana (Mouse-ear cress) PE=1 SV=1	PREDICTED: dol-P-Man:Man(5)GlcNAc(2)-PP-Dol alpha-1,3-mannosyltransferase-like [Solanum tuberosum]
SMEL_009g329740	1.8e-89	Cellular Component: endoplasmic reticulum (GO:0005783);; Cellular Component: Golgi stack (GO:0005795);; Biological Process: porphyrin-containing compound metabolic process (GO:0006778);; Cellular Component: integral component of membrane (GO:0016021);; Molecular Function: heme binding (GO:0020037);;	K05770|4.0e-90|sot:102598218|K05770 benzodiazapine receptor | (RefSeq) translocator protein homolog	Translocator protein homolog GN=TSPO OS=Arabidopsis thaliana (Mouse-ear cress) PE=1 SV=1	PREDICTED: translocator protein homolog [Solanum tuberosum]
SMEL_009g329750	1.8e-89	Cellular Component: endoplasmic reticulum (GO:0005783);; Cellular Component: Golgi stack (GO:0005795);; Biological Process: porphyrin-containing compound metabolic process (GO:0006778);; Cellular Component: integral component of membrane (GO:0016021);; Molecular Function: heme binding (GO:0020037);;	K05770|4.0e-90|sot:102598218|K05770 benzodiazapine receptor | (RefSeq) translocator protein homolog	Translocator protein homolog GN=TSPO OS=Arabidopsis thaliana (Mouse-ear cress) PE=1 SV=1	PREDICTED: translocator protein homolog [Solanum tuberosum]
SMEL_009g329760	1.5e-85	Molecular Function: oxidoreductase activity (GO:0016491);;	--	--	PREDICTED: alkylated DNA repair protein alkB homolog 8-like [Solanum tuberosum]
SMEL_009g329770	1.3e-128	Biological Process: response to stress (GO:0006950);; Biological Process: fatty acid catabolic process (GO:0009062);;	--	Stress-related protein GN=SRP OS=Vitis riparia (Frost grape) PE=2 SV=1	PREDICTED: stress-related protein [Solanum lycopersicum]
SMEL_009g329780	0	Cellular Component: cytoplasmic part (GO:0044444);;	--	Translocase of chloroplast 159, chloroplastic GN=At4g02510 OS=Arabidopsis thaliana (Mouse-ear cress) PE=1 SV=1	PREDICTED: translocase of chloroplast 159, chloroplastic-like [Solanum tuberosum]
SMEL_009g329790	4.4e-307	--	--	--	PREDICTED: uncharacterized protein LOC102597355 isoform X1 [Solanum tuberosum]
SMEL_009g329800	0	--	--	Katanin p60 ATPase-containing subunit A1 {ECO:0000255|HAMAP-Rule:MF_03023} GN=At1g80350 OS=Arabidopsis thaliana (Mouse-ear cress) PE=1 SV=1	PREDICTED: uncharacterized protein LOC102597355 isoform X1 [Solanum tuberosum]
SMEL_009g329810	0	--	--	Probable metal-nicotianamine transporter YSL7 GN=YSL7 OS=Arabidopsis thaliana (Mouse-ear cress) PE=2 SV=1	PREDICTED: probable metal-nicotianamine transporter YSL7-like [Solanum tuberosum]
SMEL_009g329820	3.7e-35	--	K00949|8.4e-36|sot:102596818|K00949 thiamine pyrophosphokinase [EC:2.7.6.2] | (RefSeq) thiamine pyrophosphokinase 2	Thiamine pyrophosphokinase 2 GN=TPK2 OS=Arabidopsis thaliana (Mouse-ear cress) PE=2 SV=1	PREDICTED: thiamine pyrophosphokinase 2-like isoform X1 [Solanum tuberosum]
SMEL_009g329830	7.4e-75	Molecular Function: thiamine diphosphokinase activity (GO:0004788);; Molecular Function: ATP binding (GO:0005524);; Biological Process: thiamine metabolic process (GO:0006772);; Biological Process: thiamine diphosphate biosynthetic process (GO:0009229);; Molecular Function: kinase activity (GO:0016301);; Biological Process: phosphorylation (GO:0016310);;	K00949|4.9e-75|sot:102596818|K00949 thiamine pyrophosphokinase [EC:2.7.6.2] | (RefSeq) thiamine pyrophosphokinase 2	Thiamine pyrophosphokinase 2 GN=TPK2 OS=Arabidopsis thaliana (Mouse-ear cress) PE=2 SV=1	PREDICTED: thiamine pyrophosphokinase 2 isoform X1 [Nicotiana tomentosiformis]
SMEL_009g329840	0	Biological Process: DNA repair (GO:0006281);; Biological Process: DNA recombination (GO:0006310);; Biological Process: embryo development ending in seed dormancy (GO:0009793);; Biological Process: RNA metabolic process (GO:0016070);; Biological Process: regulation of nucleobase-containing compound metabolic process (GO:0019219);; Biological Process: cell cycle process (GO:0022402);; Biological Pr…	K10858|0.0e+00|sot:102596485|K10858 DNA mismatch repair protein PMS2 | (RefSeq) DNA mismatch repair protein PMS1	DNA mismatch repair protein PMS1 GN=PMS1 OS=Arabidopsis thaliana (Mouse-ear cress) PE=1 SV=1	PREDICTED: DNA mismatch repair protein PMS1-like [Solanum tuberosum]
SMEL_009g329850	1.4e-215	Molecular Function: nucleotide binding (GO:0000166);; Biological Process: mRNA splicing, via spliceosome (GO:0000398);; Biological Process: RNA methylation (GO:0001510);; Biological Process: protein maturation (GO:0051604);; Cellular Component: Cul4-RING E3 ubiquitin ligase complex (GO:0080008);;	--	Protein Mut11 GN=Mut11 OS=Chlamydomonas reinhardtii (Chlamydomonas smithii) PE=2 SV=1	PREDICTED: WD repeat-containing protein 89 homolog [Solanum lycopersicum]
SMEL_009g329860	7.7e-96	--	--	Uncharacterized protein OsI_027940 OS=Oryza sativa subsp. indica (Rice) PE=1 SV=2	PREDICTED: uncharacterized protein Os08g0359500-like [Solanum tuberosum]
SMEL_009g329870	0	Cellular Component: plant-type vacuole (GO:0000325);; Molecular Function: ATP binding (GO:0005524);; Cellular Component: vacuolar membrane (GO:0005774);; Cellular Component: plasma membrane (GO:0005886);; Biological Process: obsolete ATP catabolic process (GO:0006200);; Molecular Function: folic acid transmembrane transporter activity (GO:0008517);; Biological Process: response to water deprivati…	--	ABC transporter C family member 4 GN=F17A22.19 OS=Arabidopsis thaliana (Mouse-ear cress) PE=2 SV=2	PREDICTED: ABC transporter C family member 4-like [Solanum tuberosum]
SMEL_009g329880	5.9e-98	--	K14839|1.3e-98|sot:102594937|K14839 nucleolar protein 16 | (RefSeq) uncharacterized LOC102594937	--	PREDICTED: uncharacterized protein LOC102594937 [Solanum tuberosum]
SMEL_009g329890	7.1e-176	Molecular Function: ubiquitin-protein transferase activity (GO:0004842);; Cellular Component: nucleus (GO:0005634);; Biological Process: phosphate ion transport (GO:0006817);; Molecular Function: zinc ion binding (GO:0008270);; Biological Process: plant-type hypersensitive response (GO:0009626);; Biological Process: systemic acquired resistance (GO:0009627);; Biological Process: salicylic acid bi…	K16275|1.6e-176|sot:102594612|K16275 E3 ubiquitin-protein ligase BAH [EC:2.3.2.27] | (RefSeq) probable E3 ubiquitin-protein ligase BAH1-like 1	Probable E3 ubiquitin-protein ligase BAH1-like 1 GN=OsI_27296 OS=Oryza sativa subsp. indica (Rice) PE=3 SV=1	PREDICTED: probable E3 ubiquitin-protein ligase BAH1-like 1-like [Solanum tuberosum]
SMEL_009g329900	5e-258	--	K01188|1.2e-196|tcc:TCM_004646|K01188 beta-glucosidase [EC:3.2.1.21] | (RefSeq) Beta glucosidase 11 isoform 1	Beta-glucosidase 11 (Precursor) GN=BGLU11 OS=Arabidopsis thaliana (Mouse-ear cress) PE=2 SV=2	PREDICTED: beta-glucosidase 11-like isoform X2 [Nicotiana tomentosiformis]
SMEL_009g329910	1.4e-104	Molecular Function: hydrolase activity, hydrolyzing O-glycosyl compounds (GO:0004553);; Cellular Component: extracellular region (GO:0005576);;	K01188|3.5e-83|bna:106397871|K01188 beta-glucosidase [EC:3.2.1.21] | (RefSeq) beta-glucosidase 11-like	Beta-glucosidase 11 (Precursor) GN=BGLU11 OS=Arabidopsis thaliana (Mouse-ear cress) PE=2 SV=2	PREDICTED: beta-glucosidase 11-like isoform X1 [Nicotiana sylvestris]

## Sheet:  homologou proteins
Table S7. The 15 top homologous proteins information of SmGTS1.
name	Sequence ID	Species	Expect	Query Coverage	Identities	Description
StKY284_036786	KAH0634000.1	Solanum tuberosum	0	1	0.94	hypothetical protein KY284_036786
StKY285_036770	KAH0640184.1	Solanum tuberosum	0	1	0.94	hypothetical protein KY285_036770
SlGTS1	XP_004247429.1	Solanum lycopersicum	0	1	0.93	WD repeat-containing protein GTS1
DsGTS1	MCD9639950.1	Datura stramonium	0	1	0.94	WD repeat-containing protein gts1
StWD-89X2	XP_006359386.1	Solanum tuberosum	0	1	0.93	PREDICTED: WD repeat-containing protein 89 homolog isoform X2
ScEJD97_003894	TMW98550.1	Solanum chilense	0	1	0.92	hypothetical protein EJD97_003894
SpGTS1	XP_015088617.1	Solanum pennellii	0	1	0.92	WD repeat-containing protein GTS1
StWD-89X1	XP_006359385.1	Solanum tuberosum	0	1	0.93	PREDICTED: WD repeat-containing protein 89 homolog isoform X1
CaWD-89	XP_016556197.1	Capsicum annuum	0	1	0.93	PREDICTED: WD repeat-containing protein 89 homolog
ScH5410_048127	KAG5587693.1	Solanum commersonii	0	1	0.87	hypothetical protein H5410_048127
NaWD-89X2	XP_019247170.1	Nicotiana attenuata	0	1	0.91	PREDICTED: WD repeat-containing protein 89 homolog isoform X2
NaWD -89	XP_016464720.1	Nicotiana tabacum	0	1	0.92	PREDICTED: WD repeat-containing protein 89 homolog
NtGTS1	XP_009598043.1	Nicotiana tomentosiformis	0	1	0.92	WD repeat-containing protein GTS1
NsWD-89	XP_009801941.1	Nicotiana sylvestris	0	1	0.9	PREDICTED: WD repeat-containing protein 89 homolog
NaWD-89X1	XP_019247162.1	Nicotiana attenuata	0	1	0.9	PREDICTED: WD repeat-containing protein 89 homolog isoform X1

## Sheet: Comparison
Table S8. Comparison results of candidate gene（SMEL_009g329850） in different versions (V3,V4)of the eggplant genome
Gene ID	The genome versions	Chr	Length	Description
SMEL_009g329850.1.01	V3	9	1146	gene=SMEL_009g329850.1 Name:"Similar to GTS1 WD repeat-containing protein GTS1 (Arabidopsis thaliana OX=3702)" Length=1146
SMEL4_09g007390.1.01	V4	9	1146	gene=SMEL4_09g007390.1 Name:"Similar to GTS1 WD repeat-containing protein GTS1 (Arabidopsis thaliana OX=3702)" Length=1146
